# Supplementary material for: First-in-class small molecule inhibitors of ICOS/ICOSL interaction as a novel class of immunomodulators
Source: Royal Society of Chemistry journal article supplement (doi:10.1039/d3md00150d), 2023-01-01
Supplement: d3md00150d1.zip [file d3md00150d1.zip]

## Sheet: AA-Residues
		Distance					Glycan-LIG			GLN50			PHE114			PHE119
	Time	Glycan-LIG	GLN50	PHE114	PHE119		Zbiór danych (koszyk)	Częstość	%	Zbiór danych (koszyk)	Częstość	%	Zbiór danych (koszyk)	Częstość	%	Zbiór danych (koszyk)	Częstość	%
		10.1606	10.2984	5.8912	8.8877	2	2	0	0	2	0	0	2	0	0	2	0	0
		9.6154	11.4266	6.4429	9.2237	2.2	2.2	0	0	2.2	0	0	2.2	0	0	2.2	0	0
		9.7395	10.5386	5.5454	8.6909	2.4	2.4	0	0	2.4	0	0	2.4	0	0	2.4	0	0
		10.2563	11.0652	6.2021	9.0078	2.6	2.6	0	0	2.6	0	0	2.6	0	0	2.6	0	0
		9.9944	10.6789	5.2806	8.6293	2.8	2.8	0	0	2.8	0	0	2.8	0	0	2.8	0	0
		9.3059	10.0885	5.1171	7.8075	3	3	0	0	3	0	0	3	0	0	3	0	0
		9.9894	10.4949	5.4489	8.3633	3.2	3.2	0	0	3.2	0	0	3.2	1	3.33333e-05	3.2	0	0
		10.108	9.6517	4.9608	7.8786	3.4	3.4	2	6.66667e-05	3.4	0	0	3.4	13	0.000433333	3.4	0	0
		9.3039	9.5939	5.2997	7.7614	3.6	3.6	3	0.0001	3.6	0	0	3.6	30	0.001	3.6	11	0.000366667
		8.9527	10.1752	5.8054	9.0086	3.8	3.8	15	0.0005	3.8	0	0	3.8	138	0.0046	3.8	22	0.000733333
		10.0055	10.3748	5.3431	8.8744	4	4	49	0.00163333	4	0	0	4	334	0.0111333	4	48	0.0016
		10.0021	9.5882	5.0318	7.4518	4.2	4.2	139	0.00463333	4.2	0	0	4.2	541	0.0180333	4.2	128	0.00426667
		9.4739	9.7104	5.1156	6.5427	4.4	4.4	414	0.0138	4.4	0	0	4.4	844	0.0281333	4.4	203	0.00676667
		9.6663	9.9352	5.5021	8.1533	4.6	4.6	890	0.0296667	4.6	0	0	4.6	1088	0.0362667	4.6	358	0.0119333
		10.3472	9.7596	6.0612	8.8226	4.8	4.8	1351	0.0450333	4.8	0	0	4.8	1351	0.0450333	4.8	482	0.0160667
		9.8566	9.9062	5.4181	7.8637	5	5	1600	0.0533333	5	0	0	5	1359	0.0453	5	626	0.0208667
		9.2578	10.4076	6.073	7.9422	5.2	5.2	1429	0.0476333	5.2	0	0	5.2	1244	0.0414667	5.2	876	0.0292
		10.0581	10.034	5.9838	8.4654	5.4	5.4	1068	0.0356	5.4	0	0	5.4	1095	0.0365	5.4	922	0.0307333
		9.4183	10.2003	6.2744	8.3231	5.6	5.6	763	0.0254333	5.6	0	0	5.6	995	0.0331667	5.6	1037	0.0345667
		10.0593	9.9169	5.8051	8.9907	5.8	5.8	604	0.0201333	5.8	1	3.33333e-05	5.8	815	0.0271667	5.8	885	0.0295
		10.1396	10.098	5.7844	8.4971	6	6	567	0.0189	6	5	0.000166667	6	734	0.0244667	6	759	0.0253
		10.2593	9.5886	5.4912	8.3128	6.2	6.2	754	0.0251333	6.2	28	0.000933333	6.2	644	0.0214667	6.2	655	0.0218333
		9.7921	10.2928	5.9047	8.7367	6.4	6.4	1034	0.0344667	6.4	86	0.00286667	6.4	518	0.0172667	6.4	677	0.0225667
		9.64	10.1709	5.6945	8.1853	6.6	6.6	1247	0.0415667	6.6	164	0.00546667	6.6	472	0.0157333	6.6	693	0.0231
		10.6902	9.6623	5.4101	8.1399	6.8	6.8	1112	0.0370667	6.8	165	0.0055	6.8	411	0.0137	6.8	802	0.0267333
		10.8671	9.2613	5.9717	9.6874	7	7	904	0.0301333	7	180	0.006	7	411	0.0137	7	846	0.0282
		10.0303	10.4573	6.4867	9.0774	7.2	7.2	682	0.0227333	7.2	160	0.00533333	7.2	381	0.0127	7.2	958	0.0319333
		10.9065	9.6342	5.1367	7.6752	7.4	7.4	560	0.0186667	7.4	216	0.0072	7.4	477	0.0159	7.4	970	0.0323333
		9.7334	10.0439	6.2012	9.1951	7.6	7.6	448	0.0149333	7.6	342	0.0114	7.6	559	0.0186333	7.6	1029	0.0343
		9.9442	9.8757	5.8708	8.1789	7.8	7.8	441	0.0147	7.8	475	0.0158333	7.8	671	0.0223667	7.8	1030	0.0343333
		10.244	10.0375	6.0208	8.5557	8	8	399	0.0133	8	592	0.0197333	8	751	0.0250333	8	1030	0.0343333
		10.0306	10.4376	6.1432	7.8658	8.2	8.2	314	0.0104667	8.2	804	0.0268	8.2	845	0.0281667	8.2	923	0.0307667
		11.1039	10.3252	6.1278	8.8467	8.4	8.4	318	0.0106	8.4	1038	0.0346	8.4	827	0.0275667	8.4	920	0.0306667
		11.4365	9.7262	5.4446	8.142	8.6	8.6	373	0.0124333	8.6	1358	0.0452667	8.6	783	0.0261	8.6	814	0.0271333
		11.054	9.355	5.6282	8.608	8.8	8.8	401	0.0133667	8.8	1561	0.0520333	8.8	733	0.0244333	8.8	792	0.0264
		10.3447	9.6013	5.8373	8.5195	9	9	437	0.0145667	9	1407	0.0469	9	674	0.0224667	9	736	0.0245333
		9.2561	9.7583	6.6427	9.1568	9.2	9.2	481	0.0160333	9.2	1090	0.0363333	9.2	736	0.0245333	9.2	696	0.0232
		9.7894	8.9135	6.2404	9.1699	9.4	9.4	511	0.0170333	9.4	798	0.0266	9.4	667	0.0222333	9.4	543	0.0181
		10.901	8.9913	5.7392	8.1639	9.6	9.6	623	0.0207667	9.6	574	0.0191333	9.6	594	0.0198	9.6	552	0.0184
		10.1312	9.2919	5.7694	8.4841	9.8	9.8	681	0.0227	9.8	445	0.0148333	9.8	533	0.0177667	9.8	496	0.0165333
		9.7931	9.3401	6.0204	9.122	10	10	728	0.0242667	10	338	0.0112667	10	475	0.0158333	10	457	0.0152333
		9.7357	9.5834	6.177	9.2861	10.2	10.2	783	0.0261	10.2	293	0.00976667	10.2	491	0.0163667	10.2	435	0.0145
		9.662	9.4596	6.272	9.317	10.4	10.4	681	0.0227	10.4	270	0.009	10.4	467	0.0155667	10.4	383	0.0127667
		9.411	8.8451	6.2933	9.4433	10.6	10.6	670	0.0223333	10.6	333	0.0111	10.6	426	0.0142	10.6	400	0.0133333
		9.6667	8.9976	5.9333	9.4562	10.8	10.8	640	0.0213333	10.8	365	0.0121667	10.8	445	0.0148333	10.8	412	0.0137333
		10.9564	8.5635	5.7405	8.8212	11	11	543	0.0181	11	410	0.0136667	11	376	0.0125333	11	439	0.0146333
		10.7851	8.7865	6.0608	9.6155	11.2	11.2	427	0.0142333	11.2	456	0.0152	11.2	379	0.0126333	11.2	420	0.014
		10.5139	8.8498	6.1835	9.5251	11.4	11.4	400	0.0133333	11.4	491	0.0163667	11.4	317	0.0105667	11.4	396	0.0132
		10.816	8.1297	5.0573	8.7676	11.6	11.6	366	0.0122	11.6	498	0.0166	11.6	308	0.0102667	11.6	462	0.0154
		10.6002	8.6156	5.2383	9.1097	11.8	11.8	327	0.0109	11.8	616	0.0205333	11.8	295	0.00983333	11.8	418	0.0139333
		10.1308	8.1535	6.1	9.5142	12	12	318	0.0106	12	596	0.0198667	12	259	0.00863333	12	423	0.0141
		10.2571	8.9038	6.4685	9.4186	12.2	12.2	311	0.0103667	12.2	643	0.0214333	12.2	253	0.00843333	12.2	377	0.0125667
		9.2128	8.9765	5.7242	9.0951	12.4	12.4	305	0.0101667	12.4	658	0.0219333	12.4	284	0.00946667	12.4	349	0.0116333
		10.1256	8.6161	6.0524	9.3057	12.6	12.6	278	0.00926667	12.6	613	0.0204333	12.6	246	0.0082	12.6	315	0.0105
		10.073	8.6055	6.4607	9.1664	12.8	12.8	255	0.0085	12.8	590	0.0196667	12.8	229	0.00763333	12.8	258	0.0086
		9.6714	8.7871	6.0852	9.3316	13	13	232	0.00773333	13	583	0.0194333	13	231	0.0077	13	222	0.0074
		9.6735	8.6201	6.3839	9.2152	13.2	13.2	217	0.00723333	13.2	535	0.0178333	13.2	216	0.0072	13.2	228	0.0076
		10.0976	8.4753	6.4055	10.2355	13.4	13.4	196	0.00653333	13.4	460	0.0153333	13.4	167	0.00556667	13.4	208	0.00693333
		9.2299	8.4825	6.1503	9.7196	13.6	13.6	202	0.00673333	13.6	422	0.0140667	13.6	158	0.00526667	13.6	210	0.007
		10.0421	8.6575	6.792	10.2616	13.8	13.8	174	0.0058	13.8	391	0.0130333	13.8	138	0.0046	13.8	181	0.00603333
		10.3243	8.6001	6.5831	9.7966	14	14	173	0.00576667	14	334	0.0111333	14	148	0.00493333	14	169	0.00563333
		10.603	8.7534	6.5811	10.1728	14.2	14.2	171	0.0057	14.2	380	0.0126667	14.2	128	0.00426667	14.2	138	0.0046
		10.8867	8.501	6.556	10.4156	14.4	14.4	147	0.0049	14.4	381	0.0127	14.4	119	0.00396667	14.4	157	0.00523333
		11.3007	8.351	6.6135	10.3562	14.6	14.6	103	0.00343333	14.6	376	0.0125333	14.6	92	0.00306667	14.6	155	0.00516667
		12.4589	8.0249	7.2531	10.3728	14.8	14.8	123	0.0041	14.8	310	0.0103333	14.8	98	0.00326667	14.8	146	0.00486667
		10.7982	8.9256	7.2378	10.5096	15	15	106	0.00353333	15	344	0.0114667	15	82	0.00273333	15	103	0.00343333
		11.0818	8.7874	6.5062	9.7848	15.2	15.2	89	0.00296667	15.2	363	0.0121	15.2	72	0.0024	15.2	87	0.0029
		11.0063	8.3845	6.1752	9.1969	15.4	15.4	83	0.00276667	15.4	333	0.0111	15.4	49	0.00163333	15.4	94	0.00313333
		11.0518	8.7875	6.2718	9.3712	15.6	15.6	65	0.00216667	15.6	332	0.0110667	15.6	64	0.00213333	15.6	93	0.0031
		10.7111	8.0784	6.415	10.0554	15.8	15.8	56	0.00186667	15.8	374	0.0124667	15.8	45	0.0015	15.8	68	0.00226667
		10.8194	8.3902	6.4482	9.9178	16	16	53	0.00176667	16	379	0.0126333	16	56	0.00186667	16	67	0.00223333
		10.7839	8.1982	6.809	10.4941	16.2	16.2	35	0.00116667	16.2	334	0.0111333	16.2	51	0.0017	16.2	45	0.0015
		9.7601	9.208	6.7944	9.538	16.4	16.4	22	0.000733333	16.4	314	0.0104667	16.4	46	0.00153333	16.4	40	0.00133333
		10.1326	8.1383	6.5528	10.367	16.6	16.6	17	0.000566667	16.6	304	0.0101333	16.6	40	0.00133333	16.6	38	0.00126667
		10.9689	8.6698	6.8266	10.4964	16.8	16.8	18	0.0006	16.8	311	0.0103667	16.8	42	0.0014	16.8	25	0.000833333
		10.9113	8.2852	6.4179	10.7542	17	17	13	0.000433333	17	294	0.0098	17	30	0.001	17	16	0.000533333
		11.3898	8.8463	6.7748	11.6426	17.2	17.2	8		17.2	253	0.00843333	17.2	33	0.0011	17.2	8	0.000266667
		11.7319	8.938	6.494	9.7659	17.4	17.4	7		17.4	227	0.00756667	17.4	33	0.0011	17.4	6	0.0002
		11.3902	9.056	6.1911	9.9577	17.6	17.6	8		17.6	232	0.00773333	17.6	42	0.0014	17.6	13	0.000433333
		11.8418	8.5411	6.3649	9.9456	17.8	17.8	6		17.8	236	0.00786667	17.8	26	0.000866667	17.8	5	0.000166667
		11.284	8.9356	6.5168	9.8879	18	18	7		18	197	0.00656667	18	34	0.00113333	18	4	0.000133333
		10.5121	8.8899	6.786	9.8006	18.2	18.2	7		18.2	205	0.00683333	18.2	25	0.000833333	18.2	6	0.0002
		9.0064	9.6325	6.7259	9.5712	18.4	18.4	2		18.4	168	0.0056	18.4	20	0.000666667	18.4	3	0.0001
		9.3718	9.6112	6.7782	9.5727	18.6	18.6	6		18.6	169	0.00563333	18.6	22	0.000733333	18.6	1	3.33333e-05
		9.2114	9.2911	7.0866	9.8082	18.8	18.8	2		18.8	158	0.00526667	18.8	17	0.000566667	18.8	0	0
		10.1988	8.7889	6.1562	8.5188	19	19	3		19	142	0.00473333	19	18	0.0006	19	0	0
		9.9248	8.7845	6.2443	9.1475	19.2	19.2	2		19.2	112	0.00373333	19.2	25	0.000833333	19.2	0	0
		9.2351	8.6763	5.8775	8.1957	19.4	19.4	0		19.4	109	0.00363333	19.4	14	0.000466667	19.4	0	0
		9.3961	8.7328	6.2865	8.6172	19.6	19.6	1		19.6	91	0.00303333	19.6	11	0.000366667	19.6	1	3.33333e-05
		8.9258	8.9162	5.5852	9.0451	19.8	19.8	0		19.8	96	0.0032	19.8	6	0.0002	19.8	0	0
		9.0898	8.9811	5.9714	8.3418	20	20	0		20	89	0.00296667	20	21	0.0007	20	0	0
		8.8487	8.4078	5.9128	9.1048	20.2	20.2	0		20.2	87	0.0029	20.2	10	0.000333333	20.2	0	0
		8.882	9.0555	6.0166	8.6144	20.4	20.4	0		20.4	67	0.00223333	20.4	12	0.0004	20.4	0	0
		9.2116	8.7672	5.6263	9.0013	20.6	20.6	0		20.6	58	0.00193333	20.6	11	0.000366667	20.6	0	0
		8.5722	9.5615	6.2832	9.4776	20.8	20.8	0		20.8	61	0.00203333	20.8	8	0.000266667	20.8	0	0
		9.715	8.933	5.9981	9.5575	21	21	0		21	53	0.00176667	21	5	0.000166667	21	0	0
		9.1808	9.3879	5.9485	9.5269	21.2	21.2	0		21.2	44	0.00146667	21.2	6	0.0002	21.2	0	0
		8.9678	9.0405	6.0261	8.9821	21.4	21.4	0		21.4	52	0.00173333	21.4	5	0.000166667	21.4	0	0
		9.6085	9.11	5.9549	8.8229	21.6	21.6	0		21.6	42	0.0014	21.6	0	0	21.6	0	0
		9.8967	9.4345	6.257	9.4188	21.8	21.8	0		21.8	40	0.00133333	21.8	3	0.0001	21.8	0	0
		9.6397	9.2478	6.1613	9.3309	22	22	0		22	50	0.00166667	22	1	3.33333e-05	22	0	0
		9.4569	9.9741	6.8999	9.6717	22.2	22.2	0		22.2	37	0.00123333	22.2	1	3.33333e-05	22.2	0	0
		9.6362	10.0698	6.5587	9.4423	22.4	22.4	0		22.4	37	0.00123333	22.4	0	0	22.4	0	0
		9.1763	10.4968	7.3509	9.1478	22.6	22.6	0		22.6	37	0.00123333	22.6	0	0	22.6	0	0
		8.5808	10.461	7.2712	8.7188	22.8	22.8	0		22.8	35	0.00116667	22.8	0	0	22.8	0	0
		8.4346	11.2228	7.4555	8.4086	23	23	0		23	35	0.00116667	23	0	0	23	0	0
		8.5828	10.7805	7.6959	8.7697	23.2	23.2	0		23.2	22	0.000733333	23.2	0	0	23.2	0	0
		9.3223	10.4715	7.494	9.4529	23.4	23.4	0		23.4	25	0.000833333	23.4	0	0	23.4	0	0
		7.5375	11.7435	8.298	10.8976	23.6	23.6	0		23.6	25	0.000833333	23.6	0	0	23.6	0	0
		7.5086	11.2794	8.1435	10.9864	23.8	23.8	0		23.8	13	0.000433333	23.8	0	0	23.8	0	0
		7.1512	11.6137	8.172	10.3023	24	24	0		24	16	0.000533333	24	0	0	24	0	0
		7.1093	11.9849	8.4417	10.744	24.2	24.2	0		24.2	24	0.0008	24.2	0	0	24.2	0	0
		7.2626	10.8938	7.4055	10.1755	24.4	24.4	0		24.4	11	0.000366667	24.4	0	0	24.4	0	0
		6.9284	11.41	8.2612	11.0494	24.6	24.6	0		24.6	15	0.0005	24.6	0	0	24.6	0	0
		6.6036	11.5965	8.6559	11.1697	24.8	24.8	0		24.8	15	0.0005	24.8	0	0	24.8	0	0
		6.6972	11.7212	8.4598	10.8367	25	25	0		25	11	0.000366667	25	0	0	25	0	0
		6.934	12.7093	8.8036	11.0126	25.2	25.2	0		25.2	13	0.000433333	25.2	0	0	25.2	0	0
		7.2884	11.9767	8.444	10.5005	25.4	25.4	0		25.4	8	0.000266667	25.4	0	0	25.4	0	0
		7.8503	12.4602	8.4846	10.8517	25.6	25.6	0		25.6	13	0.000433333	25.6	0	0	25.6	0	0
		8.4357	11.0243	8.1204	10.1721	25.8	25.8	0		25.8	10	0.000333333	25.8	0	0	25.8	0	0
		8.4413	11.4775	8.4788	10.8286	26	26	0		26	9	0.0003	26	0	0	26	0	0
		8.7101	11.6308	8.0317	10.5769	26.2	26.2	0		26.2	4	0.000133333	26.2	0	0	26.2	0	0
		9.585	11.595	8.0085	10.648	26.4	26.4	0		26.4	5	0.000166667	26.4	0	0	26.4	0	0
		8.2498	13.416	9.5527	11.3033	26.6	26.6	0		26.6	6	0.0002	26.6	0	0	26.6	0	0
		8.6071	13.0881	8.7798	10.9522	26.8	26.8	0		26.8	9	0.0003	26.8	0	0	26.8	0	0
		9.4699	12.1937	8.2632	11.0892	27	27	0		27	5	0.000166667	27	0	0	27	0	0
		8.5085	11.6995	7.7908	10.52	27.2	27.2	0		27.2	2	6.66667e-05	27.2	0	0	27.2	0	0
		8.9973	12.2173	8.3205	10.8951	27.4	27.4	0		27.4	4	0.000133333	27.4	0	0	27.4	0	0
		9.7234	11.7843	8.4495	11.0161	27.6	27.6	0		27.6	3	0.0001	27.6	0	0	27.6	0	0
		8.3382	11.6543	8.2754	10.5526	27.8	27.8	0		27.8	0	0	27.8	0	0	27.8	0	0
		9.8804	10.3142	7.2787	10.1376	28	28	0		28	0	0	28	0	0	28	0	0
		10.1568	10.5623	7.7785	10.7636	28.2	28.2	0		28.2	0	0	28.2	0	0	28.2	0	0
		10.4999	11.2192	8.3749	11.4447	28.4	28.4	0		28.4	0	0	28.4	0	0	28.4	0	0
		10.0259	11.3619	8.239	11.0743	28.6	28.6	0		28.6	0	0	28.6	0	0	28.6	0	0
		9.805	11.7189	7.9926	9.9258	28.8	28.8	0		28.8	0	0	28.8	0	0	28.8	0	0
		8.9849	10.915	7.669	10.2468	29	29	0		29	0	0	29	0	0	29	0	0
		9.7148	10.9073	7.3309	10.2303	29.2	29.2	0		29.2	0	0	29.2	0	0	29.2	0	0
		10.1674	10.778	7.9685	10.0996	29.4	29.4	0		29.4	0	0	29.4	0	0	29.4	0	0
		9.9408	10.8493	8.0975	10.4078	29.6	29.6	0		29.6	0	0	29.6	0	0	29.6	0	0
		10.1192	11.5263	7.9307	10.4483	29.8	29.8	0		29.8	0	0	29.8	0	0	29.8	0	0
		9.631	11.764	8.2159	11.0423	30	30	0		30	0	0	30	0	0	30	0	0
		8.8913	11.5273	7.8513	10.6316		Więcej	0		Więcej	0		Więcej	0		Więcej	0
		10.5861	10.9914	7.9149	10.7491
		9.7578	11.6719	7.6897	9.6365
		9.811	11.8285	8.224	10.8784
		9.9741	11.7223	8.018	10.42
		9.8187	11.9495	8.0361	9.847
		9.5561	12.0518	7.9041	9.7591
		9.1111	11.886	8.4401	9.8382
		9.1229	12.0961	8.0284	9.9368
		9.2853	11.3946	8.1361	10.8271
		9.0606	11.786	8.7217	11.5415
		9.2411	10.8011	7.4946	9.949
		8.992	11.2461	7.9628	11.1461
		9.1029	10.8666	7.5114	10.3241
		9.0723	11.1954	8.0101	10.9184
		9.7092	10.8329	7.726	10.3769
		8.965	11.6693	8.2868	11.4664
		8.6252	12.9626	8.9174	10.5162
		9.357	12.2446	7.8804	10.7284
		9.9527	11.2258	8.0846	10.7786
		10.0556	11.1215	8.0523	10.5366
		8.7584	11.3665	8.1237	9.937
		8.7961	11.7817	8.2344	11.0981
		9.3117	10.9208	7.6068	10.2715
		10.0621	11.5516	8.1477	10.6222
		9.0363	11.3652	7.6433	9.735
		8.8223	11.008	8.2077	10.1443
		9.6058	10.8668	8.7342	11.5505
		8.6826	11.7597	7.7411	10.4829
		9.0956	12.7815	8.5951	10.4956
		8.7484	12.2989	8.4761	10.5867
		8.9271	11.5241	8.6726	10.8431
		8.6959	10.7291	8.5093	11.3568
		8.4712	10.954	8.1073	11.5672
		8.9514	9.9442	7.6296	10.7898
		9.1475	10.6461	7.8001	11.3954
		8.7392	10.7947	7.5617	10.7294
		8.8497	10.5419	7.2483	10.0792
		9.5714	11.2324	7.9242	10.6034
		9.1303	10.9553	8.0985	10.8969
		8.3271	10.328	7.8969	11.001
		7.9647	10.9801	7.6908	11.0205
		7.7064	10.6075	7.4912	10.463
		7.7808	11.9182	8.6432	11.5025
		8.0038	10.6023	8.0865	10.8753
		8.0938	11.0575	8.1397	10.7153
		7.9412	11.4552	8.1683	11.189
		8.2755	10.9949	8.0671	11.0588
		8.1428	10.6378	7.4367	11.1373
		8.747	10.9434	7.7016	11.407
		7.9089	10.5252	7.7249	11.0203
		7.7039	10.9238	7.9142	10.6111
		8.4477	10.7588	8.103	11.2005
		8.2655	10.9635	7.8977	11.418
		8.2798	11.1754	7.8992	11.1445
		7.6944	10.4339	7.33	10.6599
		8.0941	10.5244	7.6859	10.842
		8.3431	10.7145	7.3565	9.8302
		8.1175	11.1956	8.2777	10.6784
		8.4099	11.1823	8.0519	10.1394
		8.6728	11.3186	8.2155	10.8685
		8.2607	12.3623	8.4339	10.7778
		7.9919	11.4574	7.9613	11.226
		8.0844	11.2987	7.8974	10.7159
		8.4797	10.7563	7.2203	11.1445
		7.9603	11.1897	7.9364	10.9598
		8.2397	11.0461	7.2659	9.8275
		8.2968	11.018	7.631	10.7056
		8.4125	11.0871	7.3715	10.3272
		7.8837	11.2301	7.358	9.74
		8.0817	10.4083	7.0428	9.78
		8.1303	11.3043	7.9164	10.7493
		8.3788	10.1918	7.7308	10.9341
		9.4316	9.9576	7.1623	10.596
		7.7881	10.2984	7.2571	9.8329
		7.9198	10.9757	7.6459	9.7624
		7.9503	11.495	7.7011	10.8356
		8.2728	11.1967	7.7601	10.4346
		8.0562	11.7632	8.2304	10.645
		7.7834	10.8807	7.8769	10.6953
		8.308	10.9203	7.4354	10.87
		8.4064	10.888	7.4505	10.0757
		7.9275	12.5216	8.5305	9.9132
		7.6837	11.8715	7.7893	10.1612
		8.5183	10.9125	7.3103	9.7567
		7.76	11.8925	8.0544	9.8562
		7.9448	11.1257	8.2108	11.4599
		8.0234	10.5714	7.4933	10.4822
		8.2018	10.8352	8.0252	11.2869
		7.8075	11.3934	8.1072	11.6143
		7.9936	10.2903	8.5202	11.8372
		7.779	11.4742	8.8386	11.3504
		7.9632	10.3388	8.0629	10.9309
		7.6854	11.6808	8.0818	11.0965
		7.2269	11.5292	8.4438	11.2057
		7.7825	9.685	7.5031	10.0793
		7.4064	10.8663	8.274	11.0413
		7.6433	10.4981	7.6145	11.5257
		7.8973	9.1651	7.4801	10.7895
		7.9807	10.5517	8.5761	12.3743
		7.8385	10.3641	7.898	10.8253
		8.2567	10.9229	8.3544	11.5462
		8.4258	10.5777	7.9749	10.6347
		8.8493	9.0635	7.3978	11.5528
		8.5866	10.4481	7.9718	11.6343
		8.4986	9.3433	7.1116	10.7141
		7.9651	10.6015	8.0478	10.9034
		8.4265	9.5192	7.4716	11.3693
		8.0631	10.2973	7.9547	10.9116
		8.5749	9.2067	7.6167	10.6671
		8.7882	9.1981	7.1489	10.2135
		8.6763	9.2412	7.3394	8.564
		9.7607	8.6819	6.7346	9.1928
		9.2562	8.9913	7.0915	9.313
		9.0146	8.8763	6.9852	10.2444
		9.6561	9.5619	7.0748	10.0436
		9.0106	11.4378	7.8593	10.1301
		9.3897	9.6753	7.5652	10.2622
		9.957	9.1482	7.394	11.8738
		10.1992	8.1395	6.9255	10.7197
		9.9116	8.7174	7.2628	10.9387
		10.2349	8.6765	6.8139	10.0047
		10.1081	8.2657	7.21	10.2155
		10.4944	8.9722	6.1651	9.4085
		11.0517	8.5243	6.8102	11.0309
		11.5593	8.9598	6.7781	10.4102
		11.3735	8.5884	6.897	10.6649
		11.2088	8.3791	6.6939	11.343
		12.0633	8.6655	7.1323	10.5747
		12.1313	7.8709	7.3481	10.817
		12.272	8.3851	6.0356	9.7844
		11.3674	8.7178	6.6822	10.2869
		13.8077	8.551	6.9546	10.0498
		12.9233	8.6189	7.543	10.671
		11.1997	8.1359	7.4981	10.9964
		11.5438	9.0713	8.4067	12.2842
		11.597	9.3324	7.2897	10.0574
		12.8775	8.984	6.3312	9.9341
		12.1731	8.7124	6.4983	10.2015
		12.2937	9.0564	6.536	9.4939
		13.1432	8.3659	7.2757	11.2119
		12.4742	8.966	7.23	11.4291
		12.8869	8.88	7.0474	10.7632
		12.5784	8.5105	6.72	10.2262
		12.2489	9.0386	6.4758	10.1463
		12.285	9.1455	5.8503	8.768
		12.9104	8.7095	6.42	8.9266
		12.1312	8.7236	6.6082	10.3009
		12.2725	8.1624	7.8186	11.2104
		12.3989	8.2098	6.3072	9.6874
		12.6028	8.3035	5.3402	8.2716
		11.5399	8.5648	5.3011	8.4257
		11.4674	9.4162	5.2298	7.895
		11.301	9.3511	5.3135	7.718
		11.3086	8.9187	5.0156	8.3509
		10.7066	9.3442	5.7532	8.3601
		10.7665	9.285	5.492	7.7578
		10.0207	9.3087	5.6485	7.7917
		9.1723	9.6638	5.7017	7.8583
		9.5213	9.3435	5.483	7.9642
		10.5886	8.3238	4.9817	8.3934
		9.9037	8.5648	5.29	8.2311
		10.0698	8.6863	5.2046	8.5695
		9.9637	9.6993	4.8094	7.184
		9.8033	9.3338	5.1838	7.3607
		10.1489	8.4272	5.3337	8.9098
		10.2613	9.5147	5.9479	9.2646
		9.9793	9.4332	5.6596	7.7956
		9.851	8.975	5.7784	8.8236
		10.2639	8.9956	4.7652	8.008
		10.5673	8.5605	4.8438	8.4336
		9.943	9.4291	5.8232	8.1064
		8.7279	9.5968	5.1956	7.9563
		9.3555	9.7005	5.5092	8.0975
		9.7928	9.7265	5.3018	8.5712
		10.5098	9.9131	5.2138	7.2283
		10.5363	9.2001	4.8056	6.6443
		10.73	9.3482	4.2951	7.222
		10.8399	8.6657	4.6884	7.403
		10.0067	8.8765	4.7203	6.9765
		9.5585	9.2998	4.9036	7.4956
		9.3363	8.8741	4.7116	6.8687
		10.0349	8.7375	4.5437	7.3215
		10.0049	9.3032	4.2936	6.5783
		10.0258	9.3811	4.7917	7.4398
		10.6493	8.5445	5.8651	9.28
		10.499	8.3411	6.2819	9.3425
		10.9045	8.3669	5.8763	9.619
		10.0862	8.731	4.9597	8.6896
		10.4321	8.5287	5.4537	8.474
		10.2851	8.6554	5.2538	8.6228
		9.3352	8.7319	6.5188	9.6308
		11.0674	8.9602	5.9875	9.536
		10.4534	9.7316	6.3656	10.1115
		11.0795	9.3305	5.2669	8.1368
		10.8682	8.5504	5.3868	9.4245
		10.4016	9.0368	5.5454	8.7347
		10.2025	8.8795	5.4026	8.946
		9.7822	8.6706	5.4666	8.9047
		10.5552	8.6365	5.3465	8.9616
		9.8047	8.3735	5.7137	8.7542
		9.5017	8.8811	5.7402	8.9386
		9.9512	8.6479	5.4192	8.122
		9.2922	8.5058	6.4359	9.5866
		9.4246	8.6653	6.1275	9.6451
		9.4572	8.4442	5.5904	8.6756
		10.0938	8.5428	4.862	8.4224
		9.8932	9.2712	4.9226	7.7115
		9.7138	8.9925	4.5777	8.108
		9.9777	8.6616	4.9997	8.0011
		10.4407	8.6319	4.9035	8.4198
		9.7914	8.3818	4.8824	8.3252
		9.7558	8.7117	4.6979	7.5807
		10.1485	8.5887	4.7569	8.6691
		10.127	9.8166	5.523	8.0975
		9.8749	9.1805	4.7133	8.0107
		9.6029	8.7767	5.128	8.38
		9.6801	8.1448	4.688	7.5978
		10.5741	8.7095	5.3506	8.979
		10.7813	8.718	5.0534	8.8622
		10.2232	8.6297	5.3798	8.6071
		10.8372	8.2098	5.0643	8.1788
		10.3102	8.5913	4.7394	7.4788
		9.8138	8.8281	4.8526	7.9157
		10.9884	8.9938	5.018	8.62
		10.0182	9.0803	5.3882	8.6034
		9.9037	8.7439	4.9681	8.1021
		10.2055	8.6348	5.0754	8.8551
		10.4642	8.5797	4.8334	7.4792
		9.3126	8.5103	4.5597	7.3355
		9.2534	8.6849	4.3281	7.7714
		9.5398	8.5756	4.288	7.4229
		9.6437	8.5822	4.3431	8.0225
		9.7209	8.6394	4.8889	8.2688
		9.8915	8.6703	4.8906	8.2845
		10.7173	8.3579	4.9074	8.8097
		9.5056	9.0307	4.9548	8.5201
		10.2061	8.7141	5.1912	8.4308
		10.9545	8.5347	5.318	8.9847
		10.8805	8.6641	5.3868	8.9105
		10.788	8.2795	5.5581	8.8048
		10.3237	8.8824	6.2613	9.6813
		9.9565	8.3068	5.4815	8.8489
		10.0843	8.7901	4.9425	8.1852
		11.2688	8.9107	5.0157	8.2321
		10.5002	8.4826	4.9201	9.0855
		10.3215	8.5347	5.0338	8.6782
		10.0923	8.3956	4.8994	8.5558
		10.2885	8.9834	4.8657	7.7397
		10.115	8.4316	5.014	8.4127
		10.6166	8.5269	4.5717	7.6008
		10.9316	8.6489	4.6504	8.1432
		10.0675	8.9634	4.4067	8.0497
		9.6206	9.0467	5.1573	7.7391
		10.0301	9.3761	5.4908	8.4841
		10.1636	8.8233	5.1071	8.8003
		10.2337	8.8733	4.6666	8.3467
		9.9346	8.9063	5.2465	7.9306
		9.863	9.0754	5.5652	8.5898
		9.9599	9.3073	5.3924	7.7636
		10.2058	8.6817	4.6437	7.6525
		10.35	9.2238	5.3793	7.7104
		10.6614	9.254	5.5387	7.9689
		10.4557	8.9758	5.2657	8.0764
		10.266	8.8877	5.2622	8.6949
		10.583	9.0566	5.7764	7.7378
		10.1066	8.8045	5.1851	7.6921
		10.0972	8.6665	5.3628	7.4819
		9.8234	8.6814	5.1776	8.4784
		9.9836	8.946	5.1846	8.408
		9.8431	8.6079	4.8884	8.1705
		10.0119	8.8035	5.1013	8.0812
		10.1036	8.8278	5.2539	7.7199
		10.2738	9.0804	5.6627	8.2339
		9.4314	8.769	5.4586	8.0232
		10.3413	8.7277	4.9873	7.4285
		10.4545	8.4666	4.8525	8.0097
		9.6289	8.7463	5.3624	8.1032
		10.1191	8.6633	5.0572	7.9016
		10.9548	8.8237	4.9152	8.0019
		9.444	9.4019	5.5132	7.6983
		9.887	9.1794	5.5603	7.8306
		10.1402	8.7807	5.7102	7.6406
		9.2206	9.4171	5.4866	7.6569
		9.4849	8.3898	5.1017	7.5929
		9.6912	8.8775	5.2842	7.9251
		9.608	8.7956	5.0433	8.1995
		10.2249	8.8071	5.4272	8.4678
		10.0879	8.9781	5.8382	8.816
		10.4356	8.6663	5.097	8.1644
		10.4513	8.9325	5.4833	7.7266
		10.3922	8.3941	5.3695	7.826
		9.9708	8.6449	5.1307	7.9271
		10.7261	8.3958	5.2955	8.2691
		10.4323	8.4845	5.3767	7.7908
		10.826	8.6576	5.5465	8.0709
		10.442	9.0069	5.1878	8.1619
		10.3432	9.3387	4.9121	7.6079
		11.9087	8.9881	4.9999	7.1536
		10.5616	9.0578	4.8544	7.8439
		9.7622	8.9662	5.0771	7.2531
		10.0241	9.3895	5.691	7.0892
		10.7726	8.7647	5.2788	8.3734
		10.0234	9.0072	5.6257	7.8464
		10.8085	8.9136	6.5034	9.6949
		9.6818	8.8172	5.8972	9.2888
		10.8407	8.3323	6.0006	9.5966
		11.7202	8.3087	7.1955	11.4852
		10.7496	8.2144	6.2185	9.6488
		11.6327	7.6117	6.4803	10.5779
		11.0415	8.3132	5.782	8.9622
		11.0066	8.5558	6.0498	9.3208
		11.9905	9.0675	6.1371	9.2613
		11.2178	8.4202	5.9607	8.5258
		12.9246	8.565	6.412	8.589
		12.3613	8.9599	5.4014	8.4387
		12.1305	8.5061	5.1277	8.5582
		12.458	8.5599	5.3562	8.0653
		12.2812	8.8302	5.2559	8.165
		11.3799	9.0568	5.5552	8.3748
		11.694	9.0461	4.8508	8.4656
		11.6736	8.5977	4.5903	8.1235
		11.9091	8.3333	4.6609	8.4615
		11.4049	8.562	4.6496	8.3791
		11.229	9.0036	5.4189	7.9505
		10.5802	8.6498	5.1782	8.0001
		10.3424	8.8993	5.2981	8.29
		10.413	9.1635	5.0223	6.9892
		10.5276	8.8499	4.5458	7.1347
		10.2431	9.8614	5.1464	7.2202
		10.7123	9.021	4.9439	7.305
		11.4192	9.0518	4.9904	7.3075
		11.2957	9.1437	4.4336	6.891
		12.6689	8.5638	4.9478	7.9048
		12.8244	8.8764	5.2215	8.5166
		13.1991	8.7461	4.3461	7.8575
		13.7141	8.51	4.0704	7.7609
		12.1264	8.7186	5.1727	8.2112
		12.4718	8.6008	4.2173	8.2746
		12.1028	8.3473	4.3321	7.9546
		11.8554	8.7975	4.878	7.8357
		12.2223	8.5728	4.7232	8.3084
		11.7841	8.5809	4.3296	8.3543
		13.0148	8.918	4.6992	8.6212
		13.0435	8.9521	5.0711	8.1433
		12.4815	9.7405	6.0812	8.072
		13.6679	8.7224	4.91	8.2818
		14.1269	8.7452	5.3176	7.964
		12.3877	9.2846	5.2894	7.4771
		11.555	9.5892	5.8987	7.8043
		11.2351	9.9322	5.5497	7.495
		11.3412	9.1883	5.719	7.5961
		12.2169	8.815	4.3555	7.5506
		11.5555	8.6683	4.3443	7.4678
		11.9848	8.4187	4.9216	7.8811
		11.9057	9.1946	5.4517	7.9418
		11.8518	8.7718	4.5836	6.9717
		11.1001	8.9302	5.1543	7.7827
		13.0342	8.8957	4.8197	8.2549
		13.0521	8.6428	4.7899	8.0551
		11.838	8.9422	5.507	8.7798
		12.719	8.4345	5.3909	8.931
		13.3195	8.8543	5.1632	7.8037
		12.8239	8.7277	5.9811	9.8671
		11.8319	8.5461	5.5185	9.1688
		11.9369	8.6915	5.1068	8.589
		11.6617	8.657	4.665	8.5479
		11.9551	8.8183	5.2456	8.4775
		12.7357	8.5884	5.2971	9.0108
		13.0589	8.9775	5.111	8.6239
		12.8341	10.0347	6.544	10.1555
		14.6361	8.7932	7.7911	11.9004
		14.9445	8.366	7.2352	10.9813
		12.9422	8.7196	5.9336	9.739
		11.3147	8.4737	6.2745	9.5283
		13.2508	8.4543	5.7553	9.5898
		13.8161	9.1962	6.7002	10.6508
		12.8563	8.594	6.5705	10.5246
		11.7558	8.5687	5.9726	9.5931
		11.5975	8.9095	6.6277	10.0234
		11.9997	8.8714	6.9976	10.4268
		12.624	8.8707	6.1039	10.3996
		11.2336	8.815	6.0116	8.9683
		10.9887	9.223	6.7271	9.6802
		11.645	8.5437	5.793	9.5149
		11.0834	8.512	5.4284	9.4744
		10.8221	8.9056	5.7669	8.7676
		11.5036	8.4464	4.9672	8.7821
		9.9766	8.6068	5.755	9.4448
		10.5905	8.7913	5.3552	9.105
		10.934	8.7443	6.2323	9.9072
		10.6407	8.5658	6.2721	8.9435
		10.3472	8.4673	5.6833	8.9924
		10.4969	9.0434	5.7729	9.4439
		12.3194	8.6024	5.4199	8.7157
		11.4339	8.2966	4.2504	8.1996
		11.0595	9.3974	5.4122	8.1385
		11.5743	8.768	5.7759	8.8302
		10.2639	9.3124	5.2087	7.7489
		10.0824	9.1702	4.5197	7.9033
		10.5527	8.8187	5.3939	8.8556
		9.668	9.4963	5.3822	8.3065
		10.7599	9.0512	5.1433	8.8436
		11.9888	9.5229	5.0372	8.1358
		10.743	9.0328	4.3599	7.9772
		10.6819	8.8555	5.1457	8.1027
		10.273	9.2523	5.0894	7.5568
		10.4308	8.8026	5.8794	7.9851
		10.4037	8.7836	5.496	8.6135
		11.6048	8.725	4.7215	8.1967
		11.2323	8.3242	4.8173	8.9408
		11.6489	8.6749	5.2092	8.5952
		11.343	8.6363	5.1707	8.4391
		10.5045	8.6696	5.4096	7.3985
		11.7456	8.9687	5.1735	8.0748
		11.8417	8.5854	4.3382	7.7911
		12.1339	8.6465	4.1858	8.3977
		12.042	8.4881	4.3989	7.9994
		12.2021	8.694	4.6326	8.2406
		12.2973	8.4889	4.9731	8.7641
		12.0015	8.4141	5.323	9.0654
		11.2035	8.9053	6.0111	9.3216
		12.0117	9.1011	4.6447	8.4267
		12.2623	9.3459	5.2389	8.1794
		10.9073	8.5253	4.6131	8.4008
		10.2884	8.3024	4.7392	7.954
		9.9636	9.0624	5.4002	8.2143
		10.4779	8.5591	4.9862	8.0229
		9.7828	8.7448	5.1383	7.9015
		10.2779	8.7634	4.6009	8.2111
		9.3742	8.6906	4.8557	7.6185
		10.7901	8.3362	4.4704	8.0633
		10.3082	8.5974	4.6781	8.0677
		9.6244	8.4252	5.0072	8.2848
		10.7205	8.3787	4.8235	8.3336
		10.3144	8.9827	4.4511	7.8987
		9.4154	9.1345	5.1389	7.7064
		9.7625	8.9002	5.1916	7.9876
		9.1052	8.8376	4.9523	8.0136
		9.7339	8.7381	4.3094	7.7102
		9.8344	8.9467	4.9177	7.8536
		9.8704	8.454	4.8387	7.7981
		10.477	8.7756	4.5647	8.0958
		10.0015	8.5006	4.6248	7.8645
		9.8776	8.5748	4.7193	7.545
		10.1948	8.7959	4.7946	7.5281
		10.5799	8.8594	4.6927	8.0178
		10.2298	9.5684	4.7189	7.3743
		10.1845	8.5361	4.4448	7.679
		9.8051	9.593	4.7156	7.6709
		10.1639	10.0764	5.1531	7.5306
		10.3754	9.7361	4.93	7.8778
		10.1526	10.4503	5.9095	8.3615
		10.714	10.0013	6.0405	10.2543
		10.0449	10.2635	6.1212	9.3872
		9.9753	10.1513	5.7844	9.2325
		10.312	10.7414	6.0003	9.0747
		10.1468	11.0398	7.2595	10.3812
		9.1633	11.5069	6.9789	9.4058
		10.2732	10.5091	7.0513	9.9227
		10.1942	11.2054	7.3387	9.9405
		9.9784	11.2999	7.3133	10.9559
		10.3698	11.7027	7.4113	9.5783
		10.7391	11.2648	6.328	9.5167
		9.811	9.9583	6.6024	8.7446
		10.1137	9.7071	6.0733	7.9612
		10.3254	10.8262	6.6178	8.7984
		9.3967	11.3386	6.6575	8.5296
		8.9198	9.847	6.2613	8.5349
		7.6927	11.5096	7.1751	9.3969
		7.5933	12.4048	8.2849	9.8258
		7.7771	12.1317	7.3737	9.5154
		7.9775	12.2507	7.4877	9.0084
		8.2962	14.3355	9.2269	9.3252
		7.2499	14.3342	8.945	9.6003
		7.7159	13.465	8.5795	10.091
		7.2161	11.9415	7.8064	9.0061
		6.9323	13.323	9.0114	10.5866
		7.1831	13.0315	8.456	9.9143
		7.1345	12.3657	8.2996	9.7307
		7.211	13.5242	8.8852	10.3098
		7.9271	11.7376	8.1207	10.3197
		6.9785	11.848	8.6224	11.6867
		7.2635	11.668	7.8947	11.5071
		7.3123	12.7403	8.4622	11.3472
		7.7357	11.3922	7.5493	9.9621
		7.5403	11.6697	8.5936	11.4295
		7.6685	13.1355	9.3803	10.8751
		7.8176	12.5992	8.9294	11.7808
		7.8071	11.493	7.6555	10.4067
		7.1121	13.4812	9.1251	11.281
		7.6775	13.1511	8.8706	11.3995
		7.6753	12.6116	8.5715	11.7585
		7.65	12.8536	8.8605	11.1377
		7.8485	12.7376	8.0828	10.4674
		7.1891	13.3	8.2449	10.0447
		7.0373	13.0227	8.7042	10.9281
		6.7233	12.5257	8.6303	11.2263
		6.4075	13.6619	8.7114	10.6013
		7.7654	12.6171	8.3382	10.8101
		7.2128	13.3961	8.5939	10.5583
		7.6294	13.7124	8.8882	11.4365
		8.153	13.9213	9.125	10.9807
		7.2376	14.5688	9.4658	10.9916
		6.1616	14.1399	9.4725	10.244
		6.3149	14.2049	9.3169	10.6919
		6.1106	13.6479	8.6703	10.6954
		5.9767	14.8627	9.7571	10.9155
		5.547	13.5571	8.7483	10.5707
		5.7126	13.8462	8.9566	11.0019
		7.0433	11.8697	7.92	9.3653
		7.0672	12.0357	7.7445	9.4242
		6.4481	12.114	8.394	9.5473
		5.8411	12.5631	8.2948	10.535
		6.032	12.8604	8.5758	10.5901
		5.9754	12.6662	8.1042	9.9922
		6.4972	12.5483	8.2005	10.476
		5.7901	12.7249	8.3992	10.3757
		6.7055	13.2626	9.2014	10.7445
		6.606	13.6246	9.3468	10.7516
		5.9792	14.2894	9.2748	10.9335
		5.1964	14.0287	9.1684	10.5063
		4.9757	14.0627	9.043	10.4024
		4.8075	13.9092	9.3055	11.0473
		4.5231	13.7894	8.9507	10.9687
		4.8968	13.5941	9.0168	10.4639
		4.2076	13.824	9.0755	11.2639
		4.3943	14.0502	9.536	11.32
		4.085	14.2102	9.1981	10.365
		4.6197	14.421	9.3553	10.5041
		5.0964	12.8262	8.6928	10.6894
		4.3063	13.6987	9.6646	11.3275
		3.7688	14.451	10.0944	11.1121
		4.5034	14.4761	9.6132	11.1437
		4.1017	13.9673	9.202	10.3549
		4.1371	14.5154	9.4938	10.6177
		4.3587	14.2857	9.4474	10.7348
		4.1551	14.6867	9.8624	10.9108
		4.0962	15.0896	10.2113	11.8874
		4.4525	14.5103	9.7802	10.8294
		4.073	14.9692	9.5889	10.0569
		3.8557	14.7209	9.6845	11.2608
		3.7203	14.8716	9.6658	10.7556
		4.8174	13.9784	8.9092	10.5987
		4.7112	13.5737	8.9165	11.2125
		4.5631	12.9303	8.5878	10.956
		4.7797	13.424	8.6136	10.429
		4.924	13.3074	8.9407	10.5773
		5.1261	12.9047	8.8409	10.9736
		4.345	13.4286	8.6696	10.775
		4.6927	13.1674	8.4763	9.9839
		5.4159	12.3228	8.2296	10.092
		5.12	12.262	8.483	9.9595
		5.5394	12.8716	8.9199	9.7706
		5.4957	12.5203	8.1265	9.4673
		5.2085	11.8366	7.9754	10.1406
		5.3812	12.3866	8.3021	10.2415
		4.8193	11.8259	8.0402	10.0471
		4.9019	12.3013	8.1288	9.6448
		5.1397	11.3765	8.2418	10.4055
		4.7094	11.6048	7.8427	9.883
		4.665	11.2752	7.9199	9.4749
		4.873	11.7563	7.9286	9.2486
		4.597	11.9894	7.897	10.1932
		4.822	12.0402	8.2994	10.692
		4.7489	11.7521	7.8423	9.4767
		4.7248	12.4499	8.2532	10.596
		4.6673	12.4	8.1378	9.6836
		5.6187	12.1605	8.6781	9.8844
		5.1539	11.8348	8.0097	9.862
		4.7695	11.9654	8.1572	9.8207
		5.5093	11.3465	7.966	10.4164
		4.7879	12.4217	8.4052	9.7203
		5.1971	11.6756	7.9367	9.7463
		4.8839	12.0682	8.8904	10.1808
		4.9667	11.5544	8.1315	10.2999
		4.9922	11.9779	8.4618	10.3383
		4.9597	12.5573	8.2985	10.1139
		4.2895	12.7333	8.9267	10.8733
		5.5123	11.9829	8.1296	10.0514
		4.8811	11.8834	7.987	10.3566
		5.063	11.985	8.508	10.8059
		4.7085	11.6549	7.9943	9.9283
		5.2825	11.5105	7.6386	9.5417
		4.9291	11.8937	8.3853	9.6219
		4.6287	11.8328	8.1804	10.1031
		4.7078	11.8657	7.7816	9.1109
		4.6868	11.9219	8.2805	9.5113
		4.7728	11.9998	8.8374	10.253
		4.5938	10.4068	7.6018	10.0894
		4.3068	11.8342	7.7874	10.1195
		4.8284	11.9106	8.1006	10.8845
		4.0606	12.5261	8.4719	10.8727
		4.1681	12.6141	8.584	11.0777
		4.0047	12.9365	8.4985	10.9268
		4.1254	13.1072	8.7183	11.5671
		4.0646	12.4673	8.0331	10.6691
		3.7988	13.2718	9.0199	10.6337
		3.604	13.6063	9.1268	10.5771
		3.837	13.7312	9.146	10.4625
		3.7931	13.6462	8.984	10.7572
		3.9461	14.3957	9.6333	11.3623
		4.6798	13.5639	8.7518	10.3574
		5.031	13.7977	8.8896	10.6389
		5.268	13.8772	8.9159	9.6236
		5.1866	13.4017	8.3171	9.7688
		5.0393	13.38	8.768	11.0299
		5.5138	13.1129	8.4597	9.6444
		5.1779	12.9897	8.604	9.8889
		5.217	11.8791	7.7666	10.1755
		5.2242	11.405	7.5474	10.3053
		4.8269	13.1952	8.7499	10.4693
		5.6308	13.0566	8.6765	10.4073
		4.972	12.3179	8.0789	10.2042
		4.9359	12.0097	7.8168	9.6722
		4.8097	13.531	8.3201	9.2211
		5.2167	13.4429	8.9553	10.6035
		5.2518	13.8259	8.9485	10.6366
		5.0053	13.0382	8.4615	9.9135
		4.5662	12.6245	8.2813	9.7429
		5.8481	13.8378	9.1086	10.9672
		5.3311	13.3784	8.9335	10.3334
		5.7792	12.8603	8.5393	9.8948
		5.831	13.0481	8.5687	10.3859
		5.3037	12.2851	7.0088	8.6903
		5.7233	12.5887	7.0718	8.7931
		5.3273	13.2683	8.2101	8.7185
		5.2605	13.6266	8.2418	8.9164
		5.2636	13.27	8.2812	8.5679
		4.9646	12.9724	7.8077	7.8088
		5.0983	14.025	7.7037	7.8823
		5.2785	14.1487	8.3111	8.0136
		5.1758	13.6649	7.8323	7.7182
		5.3346	13.7697	8.0937	8.5272
		4.9565	14.1216	8.9877	9.2029
		5.3419	13.7308	8.1529	8.9085
		5.2905	14.2084	9.0824	9.5074
		5.1334	14.6498	9.0796	8.8533
		5.5699	15.8546	9.6244	9.2012
		5.7028	15.5524	9.5271	8.6695
		5.4499	14.7294	8.5919	8.4134
		5.7773	15.0287	8.4552	8.3739
		5.7103	15.0508	9.2248	8.4519
		5.5311	14.2891	8.4061	8.4389
		5.0346	14.1002	8.7836	8.8431
		5.219	14.0339	8.7308	8.3474
		5.3225	13.5708	8.1273	8.4614
		5.0179	14.0578	8.4376	8.5419
		4.7373	13.9687	8.8002	8.8242
		5.1288	14.709	8.4852	8.5991
		5.1993	14.425	8.4544	8.7763
		4.9956	15.2138	8.5861	8.1588
		5.2429	14.7018	8.647	8.3431
		5.3256	14.8371	8.7532	8.7853
		5.1108	14.81	9.0594	8.4763
		5.3311	13.7524	7.9696	8.3182
		4.9947	14.8863	8.8581	8.3098
		5.2651	14.307	8.6708	9.426
		6.1864	14.5271	8.8133	9.0669
		5.4134	15.4208	9.3377	8.7953
		5.5699	14.5769	8.7356	8.823
		5.3636	13.7303	8.3227	7.6743
		5.0292	15.1111	8.8611	8.3071
		5.0921	14.381	8.3137	7.9318
		5.3687	15.1506	8.9057	8.4223
		5.4096	15.319	9.462	8.8368
		5.1169	14.549	8.7023	7.7577
		5.2489	13.4715	8.0739	8.1168
		5.2203	14.1359	8.4709	7.7484
		5.7923	14.6296	8.9904	8.9144
		5.7111	13.9159	8.2958	8.5549
		5.7372	13.9712	8.3373	8.7266
		5.2687	14.8686	9.3658	8.7774
		5.4724	14.3846	8.6183	9.683
		5.5436	15.1067	9.8294	9.2871
		5.3207	14.638	9.0742	10.0834
		5.6792	17.1154	12.2143	12.3053
		5.2502	17.1064	11.6967	10.9415
		5.661	14.6362	8.9713	9.0201
		5.1427	14.3517	8.9472	8.6998
		5.4462	14.5943	9.5913	8.419
		5.5973	14.514	9.2746	9.4276
		5.7675	14.0603	9.2175	9.9069
		5.275	14.133	8.2969	9.426
		5.1421	14.2	8.6696	9.025
		5.0022	14.0534	8.4714	8.9834
		5.4605	13.8925	8.183	8.8329
		5.6515	13.4238	7.9863	8.9104
		5.4165	13.0572	8.0699	8.4785
		5.0359	13.3449	8.246	9.7259
		5.427	13.5915	8.829	9.7173
		5.3353	14.8059	9.9907	10.3769
		4.569	15.1848	9.105	9.9709
		5.0502	14.1539	9.4227	10.0966
		4.9276	13.4352	9.0367	9.784
		5.7126	14.0552	9.5178	10.2578
		5.1578	13.7547	9.2088	9.8278
		5.4362	13.8306	9.0401	9.5509
		5.4156	14.3985	8.7673	8.8175
		5.2758	14.3007	8.957	9.1811
		4.8607	14.111	8.8026	9.3458
		5.1741	13.5341	7.8525	9.278
		5.3435	12.3142	8.119	8.755
		4.895	12.9234	8.0608	9.1029
		5.4551	12.898	7.7062	8.4423
		5.5553	13.5431	8.1055	8.9003
		5.4074	13.6714	8.4797	8.6529
		5.0992	13.1057	8.4033	8.832
		5.3225	12.4288	7.6673	8.9154
		5.2283	12.877	8.1982	8.827
		5.1836	12.5358	7.8115	8.326
		4.9458	13.9052	9.1002	9.3155
		5.2688	13.8511	9.3111	9.7573
		5.1013	13.7533	9.0887	9.0832
		5.4556	13.1171	8.2757	9.0184
		4.9661	13.8981	9.1162	9.3755
		5.335	13.284	8.1781	8.4933
		5.0884	13.4684	8.8634	8.9566
		5.8421	13.65	8.9231	7.6405
		5.4729	13.3537	7.7718	8.1747
		5.5003	14.3957	9.5198	9.5756
		5.0672	13.2201	8.2916	8.4715
		4.6807	14.6689	9.2685	9.622
		5.0682	13.8406	9.1578	9.6376
		4.9931	12.727	7.9148	8.4413
		5.0262	14.3759	8.9717	8.9943
		4.8001	14.1214	8.9303	9.4341
		4.69	13.2336	8.1744	8.5721
		5.3831	13.5813	8.6465	8.8418
		5.0305	13.8842	8.7009	8.2976
		5.6777	13.4278	8.4817	8.0989
		6.2795	12.726	7.9404	8.6908
		5.4506	13.9277	8.9508	9.2816
		5.0527	13.5313	8.5483	8.6762
		5.4161	14.6385	9.204	8.7352
		5.7654	13.0544	7.8109	8.1303
		5.8176	12.963	8.489	8.7058
		5.4904	13.3244	8.5227	9.4624
		5.115	13.3856	8.6436	9.2069
		5.2268	13.4146	8.382	9.62
		4.9037	13.9849	9.3375	9.6103
		4.686	13.8582	9.3097	9.6326
		4.9059	13.227	8.6535	8.9129
		5.5531	12.1017	7.9786	9.2422
		5.6478	12.3706	8.7251	9.3214
		5.6322	11.8146	7.6528	9.1891
		5.7819	12.9066	8.7114	9.3856
		5.542	13.2158	8.6612	9.6406
		5.2405	14.2708	8.8796	8.7804
		4.7287	14.5671	9.2475	8.2236
		5.6156	13.504	8.7608	8.9265
		5.1787	14.012	9.3986	9.6178
		5.532	14.0695	8.2143	9.1249
		5.5529	13.8861	8.5513	8.8739
		5.2293	13.3855	8.5349	8.6456
		5.2097	13.2872	8.543	9.6123
		5.2455	12.5602	8.3305	10.1043
		4.6227	14.3817	9.4707	10.7187
		4.791	14.4222	9.523	10.311
		5.2163	13.7302	9.2128	10.7325
		4.8586	13.6307	8.4925	9.6479
		5.5487	13.0112	8.3712	9.7315
		5.474	12.9124	8.1385	10.3218
		5.8349	13.078	8.9753	10.6375
		5.4199	13.1315	8.5071	9.9612
		5.3776	12.9224	8.6184	9.6147
		5.2551	12.614	7.9593	10.0496
		5.033	13.4778	9.3273	10.5229
		5.294	13.9385	9.9142	11.1105
		5.1053	15.0538	10.6331	12.7323
		5.5075	14.1704	10.6579	12.7115
		6.2627	13.9435	10.2981	12.0512
		5.8043	14.2404	9.6549	11.633
		5.5828	12.7691	8.6513	10.0062
		5.3952	12.5788	8.0807	8.5143
		5.5507	11.7381	6.6194	8.8019
		5.5504	10.9945	6.453	8.2265
		5.3009	11.8829	7.2381	8.6291
		5.3192	11.6418	7.2306	9.0203
		5.3915	11.5106	7.016	8.9906
		5.1025	11.8571	7.965	9.7601
		4.9364	12.9318	8.2222	9.2525
		5.0102	11.2767	6.8911	8.5977
		4.9084	11.5646	7.1014	9.1934
		5.7716	10.837	6.5221	9.1963
		5.5108	10.6391	6.4248	9.1084
		5.4496	10.6	6.6394	9.0683
		4.9573	11.1926	6.9001	9.1797
		5.5462	10.9367	6.4647	8.3628
		5.4167	10.4038	5.6951	8.5051
		5.5767	10.6443	5.8841	7.8611
		5.132	11.2994	6.2027	7.9327
		5.0506	11.4353	6.8034	7.5214
		5.2518	11.2385	5.8555	8.1778
		5.6705	12.5659	6.9453	8.516
		5.2965	12.8738	7.6011	9.3735
		4.7403	13.5392	8.5386	9.021
		5.5371	12.1728	7.3762	8.665
		5.9071	11.6989	7.4447	8.7484
		5.4427	12.7291	8.2134	8.9554
		6.0497	11.0601	6.4773	8.2196
		6.0482	11.0934	5.9942	7.6815
		6.5008	10.2769	5.6394	8.8904
		5.5601	12.0286	6.6519	8.419
		5.7512	11.433	6.754	9.3726
		6.169	10.708	6.6953	9.8424
		6.2186	12.4765	7.5155	10.1199
		6.2536	11.6374	6.6694	7.2959
		6.7159	11.3068	6.2527	6.8
		6.8385	11.8345	6.5163	6.4992
		6.9894	12.9662	7.1884	6.0979
		6.5181	12.3449	6.7545	7.0534
		6.5936	13.2609	7.9556	8.0439
		6.0839	13.1809	8.0266	8.3422
		5.8217	13.9191	8.448	8.1531
		6.3018	14.0077	8.5519	8.2879
		6.5204	13.3963	7.5859	8.6364
		5.9754	14.1362	7.9984	8.2515
		4.8398	14.7555	8.5326	9.4219
		5.5359	13.3701	8.2218	8.3865
		5.9075	15.2943	8.9843	8.487
		5.7332	14.4563	8.799	8.7736
		5.38	14.8217	8.916	9.5871
		5.4519	14.7347	8.8764	9.1015
		6.3621	13.552	8.3561	9.6268
		5.2692	13.9158	8.9786	9.6879
		5.2311	13.6066	7.8941	8.261
		5.6136	13.9506	8.5432	8.6042
		5.3195	14.1536	8.4944	8.6313
		5.325	14.1515	8.5743	8.7748
		5.2273	14.6586	8.9537	8.7734
		5.6859	14.4464	9.8002	10.0341
		4.8572	14.6771	9.1546	9.4037
		5.6497	13.3023	7.8134	8.1223
		4.8389	13.0906	7.7328	8.2564
		4.9586	13.2813	8.0672	7.5135
		5.2654	12.5102	7.4625	7.7447
		4.4756	13.8147	8.5642	8.1597
		5.0022	12.3675	7.6474	8.9721
		4.9798	12.6379	7.8665	8.875
		4.7416	11.0032	6.4582	8.0501
		4.8061	11.256	6.0344	7.7466
		5.588	11.2001	5.738	7.897
		5.3041	10.957	6.0241	8.5938
		5.1952	10.6307	5.6287	7.853
		5.4763	10.8823	5.9703	8.3413
		5.172	12.1869	6.773	8.5738
		5.8008	13.418	7.7378	8.9193
		5.2335	12.7026	8.1261	8.5156
		5.5389	13.0212	7.5737	8.356
		4.9033	14.179	8.5252	7.7998
		5.3503	14.8999	9.0028	8.2786
		6.0673	14.5298	9.2739	9.5538
		5.6726	13.0918	7.951	8.6911
		4.8083	13.6714	8.6082	8.9527
		5.0721	13.824	8.5057	8.9072
		4.5469	13.4347	8.3547	9.4094
		5.6346	14.373	9.0901	10.0842
		5.5207	15.0717	9.4628	9.4624
		5.1519	14.2296	8.3609	9.8204
		5.9091	13.1129	7.6901	8.9595
		5.3396	14.2807	8.7922	9.623
		5.468	15.0897	9.8569	10.5172
		5.2095	14.8764	9.9077	10.4804
		5.5875	14.7844	9.252	9.184
		4.7906	14.3825	9.1189	9.0865
		5.299	14.2214	8.9607	8.1479
		5.2285	14.9722	9.8469	9.7426
		5.2825	15.2417	9.8337	9.1769
		6.1836	15.183	9.4038	9.1323
		6.0844	14.1663	8.6032	9.5533
		7.1517	14.4587	9.4243	10.0491
		6.8538	13.8125	8.4067	9.0525
		7.8536	12.6358	8.0711	8.7537
		8.0542	12.6769	8.0364	8.7087
		6.9247	14.0587	9.5291	10.2296
		7.2736	13.5273	9.0663	10.1065
		8.2363	13.2874	8.7586	8.8301
		7.6672	13.4562	8.7058	9.5233
		7.31	13.6171	8.661	9.0164
		6.8342	13.1081	8.7037	8.7923
		7.1769	12.741	7.8587	8.6458
		7.28	12.4133	7.6443	8.6972
		7.3019	13.7823	8.5785	8.8229
		7.5044	13.5606	8.9035	8.8847
		6.8172	13.5277	8.823	9.2007
		7.0849	12.3129	7.5557	9.4086
		6.4253	12.7738	7.5349	8.9726
		7.2912	11.7484	7.1816	8.9231
		6.6833	11.8268	6.2772	8.4274
		7.3572	13.0999	7.9786	9.3517
		6.7261	12.7809	8.1484	9.5613
		6.6686	12.6592	7.922	10.3569
		6.4619	12.905	8.3884	10.8719
		7.0045	13.6507	8.929	10.3504
		6.6874	13.0611	8.5676	10.3879
		6.3945	14.0695	9.2244	11.3524
		5.8826	13.3765	8.8011	10.2692
		6.5493	13.4307	8.6279	10.6443
		6.768	12.8404	8.6017	11.2187
		7.4411	13.119	8.8568	10.4064
		7.1904	13.4413	9.5516	11.0314
		7.1335	13.7901	9.2585	11.4214
		7.127	12.5912	8.5144	10.097
		7.0632	12.2384	8.2168	10.9447
		6.7449	12.9926	9.0544	10.8912
		5.9926	13.1439	8.8153	11.0706
		6.9288	12.9226	8.5726	11.1482
		6.4805	12.8151	8.6914	10.6753
		6.5906	12.6087	8.4265	10.4246
		6.4241	13.6194	9.227	10.7487
		6.9597	12.8584	8.6624	10.6963
		6.2945	12.9992	8.4789	10.627
		6.2892	12.7858	8.4378	10.9631
		6.3813	13.504	8.7456	10.7825
		5.8805	13.5836	8.6552	10.8109
		6.0485	13.4259	8.3337	10.4346
		6.3125	12.585	7.8841	10.2036
		6.539	12.7704	8.6746	11.0335
		6.5934	13.075	8.1075	10.39
		6.6469	12.3987	7.627	9.871
		6.2058	13.0925	9.2211	10.7676
		6.5028	12.8056	8.3566	9.9482
		6.5786	12.8511	8.6032	10.7826
		6.4327	12.642	8.3945	10.7563
		6.6608	12.543	8.6988	10.5405
		6.6279	12.2669	8.4236	10.9745
		6.055	12.5867	8.3905	9.3536
		6.2904	12.2688	7.646	9.9332
		6.2886	12.1638	7.6989	10.0184
		5.9568	12.1229	7.6462	9.1054
		7.0695	10.7178	6.1324	7.655
		7.1117	10.603	6.2119	8.3398
		7.05	12.0108	7.2777	9.2496
		6.6605	12.2472	7.4598	7.9247
		6.3738	13.4024	8.4526	9.0923
		7.0002	12.6507	8.0857	9.7755
		6.6963	12.7452	8.2482	9.3298
		7.199	12.806	8.1451	9.1581
		7.2562	12.6704	8.3348	8.2764
		6.9974	12.3713	7.9372	9.0736
		6.955	12.3313	8.1578	9.1559
		6.8653	13.3095	8.228	9.3477
		7.043	11.984	7.8631	8.0708
		7.1828	12.4629	8.0047	8.6719
		7.3544	12.1065	7.5622	8.42
		7.188	12.5526	7.7599	9.2506
		6.5508	12.3109	7.9759	10.136
		7.3614	12.1493	7.1814	8.4393
		7.5597	12.2912	7.6173	8.5423
		7.1849	12.5992	8.1428	8.0365
		6.4681	13.1897	8.4998	8.8075
		6.5866	13.2779	8.572	9.8991
		6.4667	13.0403	8.7192	10.4136
		7.2694	13.2239	8.8879	10.5826
		7.4242	12.9737	8.3895	10.0808
		7.3509	12.1434	8.1257	10.3394
		7.4676	12.435	8.269	10.5528
		6.367	12.5721	8.6529	11.4363
		6.7045	12.285	8.1367	9.931
		6.7496	13.6419	8.4435	9.7783
		7.0138	13.3219	8.3333	10.4212
		6.4778	13.8444	8.8752	10.6321
		6.8882	14.4503	9.0829	10.1305
		6.9474	13.4106	8.3708	10.4154
		6.7663	13.0825	8.4416	10.6722
		6.9289	12.7581	8.4076	10.7735
		6.4138	12.7187	8.1781	10.2219
		6.5501	13.3158	8.652	9.7906
		6.8975	12.5611	8.0989	9.0142
		7.2654	13.1506	8.1627	9.8826
		7.2804	12.9871	8.2461	8.9191
		7.7055	12.8819	7.8786	9.2442
		7.8951	13.3026	8.0144	9.0651
		7.3684	12.8163	8.1682	10.008
		7.9584	11.5783	7.8681	9.721
		7.9479	11.3303	7.539	8.7201
		7.6526	12.4316	8.1733	10.2097
		7.2162	12.1025	8.2355	9.769
		6.9908	11.8305	7.3114	10.1024
		7.2615	11.6508	7.8944	9.56
		7.5925	12.3236	8.465	9.0782
		7.0326	13.2975	8.6344	10.0686
		7.1271	13.6271	8.6089	8.4664
		7.2055	13.4208	8.3782	9.135
		7.0721	12.6552	8.1655	8.9907
		6.8174	12.9864	8.5004	9.4762
		7.2404	13.612	8.4758	8.7291
		8.2669	12.9971	7.9424	9.1088
		7.5328	13.0127	8.4005	9.7198
		7.8896	12.6982	8.2469	8.2906
		7.1901	13.2171	8.4502	8.8389
		7.9225	12.6602	8.0972	10.2828
		7.3583	12.3342	7.9947	8.9924
		7.071	12.9681	8.4196	9.3434
		7.0129	13.0374	8.1395	9.1849
		7.6977	12.4268	8.0976	8.8138
		6.1762	12.0544	8.0802	9.7161
		6.4098	12.9775	8.2041	9.1482
		6.6423	13.0893	8.2114	9.1994
		6.4704	12.7655	8.0779	9.1119
		6.7451	12.3003	7.5611	9.8201
		6.8322	12.7351	8.4189	11.0765
		6.8015	13.3407	8.3633	9.1852
		7.1954	12.6403	8.0666	9.6762
		6.3828	12.6596	7.9028	9.1086
		6.4845	13.3436	8.2413	10.0352
		6.6626	12.5451	7.6327	9.7034
		6.1534	13.5504	8.85	9.0291
		6.052	13.1783	8.3098	9.3495
		6.4393	13.0749	8.3188	9.0126
		6.3209	13.3207	8.2331	10.0902
		6.3907	12.9206	8.2351	9.5978
		6.7495	13.1203	8.1707	9.5701
		6.5073	13.6352	8.3314	9.5343
		6.5485	13.2245	8.2942	9.5995
		7.1351	13.7348	8.8614	11.507
		6.8662	13.7073	8.9099	10.2353
		6.5799	13.3701	9.0326	10.4762
		7.0166	13.5686	8.7089	9.3077
		7.1629	13.0209	8.4623	9.8068
		7.1546	12.701	8.0097	10.5791
		7.3415	13.2723	8.4325	10.2057
		7.634	12.9563	8.4571	10.0377
		7.5894	13.1106	8.1997	9.0638
		7.9527	13.7175	8.7713	9.1764
		7.7003	12.6777	8.3806	9.8621
		7.6098	12.7707	8.2608	9.0904
		7.8847	13.4776	8.7178	9.9209
		7.738	13.181	8.4711	9.6116
		7.2745	13.017	8.1169	8.8486
		7.149	13.7435	8.7857	9.7473
		7.0769	12.5873	8.0477	9.7586
		7.0038	12.7181	8.078	9.772
		6.8611	12.7127	8.0676	10.7015
		6.6708	13.0136	8.2259	9.8336
		6.5808	13.5604	8.7938	10.48
		6.2906	13.8213	8.5884	9.6502
		6.9262	13.779	8.86	10.0875
		6.5508	13.2531	8.3036	10.263
		6.2479	13.6054	8.8262	11.1564
		6.2831	13.4991	8.5856	10.5273
		6.5104	13.163	8.8853	11.0345
		6.5662	13.1907	8.6468	9.903
		6.5123	13.1662	8.6726	9.6645
		6.3827	14.0727	8.9505	10.1002
		6.2397	13.528	9.2175	9.6696
		6.1876	12.8597	8.1584	9.3796
		6.5198	13.0663	8.8282	9.7903
		6.8286	13.6591	8.6406	9.3633
		7.6142	12.1819	7.2798	9.3244
		7.3509	12.4076	7.9336	10.7054
		6.6092	13.7382	8.8599	10.4855
		7.3878	12.8084	8.4055	10.7494
		7.0427	13.7422	8.9116	10.9137
		7.5529	12.7694	8.3313	9.7946
		7.3602	12.4422	7.3315	8.3781
		6.3544	13.3657	8.1399	9.9245
		6.587	13.2459	8.1969	10.8819
		6.8442	12.4827	7.7139	9.8851
		6.3834	13.4733	8.4661	10.017
		6.3776	13.5085	8.9977	10.7275
		6.5486	12.7753	8.2214	10.0088
		6.674	13.5007	8.4868	11.1053
		6.578	13.3501	8.8685	10.9855
		6.9039	12.5514	7.9322	10.8874
		6.6573	12.8299	8.4233	11.421
		5.7806	13.1676	8.4355	10.4723
		6.1932	12.9114	8.5872	11.1502
		5.9084	13.743	9.3121	11.0749
		6.2109	13.1601	8.8254	10.2489
		6.5598	12.7979	9.0119	10.0166
		6.871	13.2021	8.7047	10.1013
		7.1133	12.5171	8.3774	10.8596
		6.6905	13.0581	8.6318	9.5373
		6.5347	12.649	8.6341	10.9815
		6.4545	11.9405	7.8792	10.6806
		6.6671	12.4045	8.1564	10.9585
		7.2175	12.1752	7.5855	10.942
		7.0508	11.9558	7.2589	9.6612
		6.6215	13.1681	8.086	10.233
		7.0639	12.4962	8.1135	10.7997
		7.2318	13.2389	8.6208	10.4248
		6.9182	11.809	7.4657	10.7873
		6.9328	12.8732	8.2604	10.2661
		6.9372	12.6482	7.9714	9.8476
		6.4462	12.7964	8.2406	10.7327
		7.6386	13.0283	7.9218	10.2748
		7.1917	12.794	7.8738	9.7202
		7.1118	13.0146	8.1827	10.0366
		6.8723	12.7404	7.9381	10.7652
		6.4232	13.2887	8.6598	10.8095
		7.0623	12.7513	8.0993	10.0714
		6.9542	12.4904	7.7234	10.5056
		6.6723	12.7491	8.1685	10.8782
		5.9814	12.8769	8.1751	10.8708
		6.3502	13.8717	8.5257	10.4606
		6.2096	12.9034	8.1368	9.8205
		5.9377	13.0571	8.8193	9.8464
		6.1258	13.2993	8.3266	9.8474
		6.3512	12.6961	7.9904	10.2206
		6.0031	13.6002	8.7499	10.0308
		6.3455	13.2536	8.4283	10.2297
		6.4985	13.3996	9.049	9.8075
		6.2319	13.2053	8.6513	9.2106
		5.8796	13.1405	8.5718	9.5193
		5.9951	12.8464	8.6414	9.687
		6.3356	12.9698	8.3365	9.761
		6.3195	12.9066	8.6224	9.667
		6.8437	12.8631	8.5412	9.9017
		6.9758	12.9322	8.4306	8.9303
		6.9432	12.847	8.6212	9.2432
		7.1916	12.2858	8.1635	9.542
		7.7016	11.6938	7.4821	9.3043
		7.8965	11.0088	6.8208	9.0856
		7.6253	12.9317	7.7152	9.5701
		7.4763	13.0373	7.8224	11.132
		7.1676	13.0722	9.0895	12.5727
		7.0893	13.7872	9.6547	13.5981
		7.0569	14.3528	10.3624	14.6951
		7.33	13.9051	10.4266	13.7007
		7.8135	12.4806	8.8069	11.4567
		8.124	12.9561	8.8832	11.5871
		7.7314	11.5984	8.0054	10.9416
		7.1611	13.2797	9.064	11.2427
		7.2826	13.3833	8.6692	11.3627
		7.171	13.5835	8.8688	12.0617
		7.4067	12.8791	8.7408	11.9522
		7.072	12.9189	8.7828	12.1888
		7.196	12.8173	9.3362	12.9927
		7.1491	13.3541	9.0034	11.4965
		7.3925	13.4329	9.6876	11.5762
		7.6482	13.9629	9.3431	11.9921
		7.2292	13.5222	8.6755	11.731
		6.8284	13.2482	8.8916	11.5411
		7.5613	13.9874	9.5635	12.3264
		7.7721	13.5632	8.3474	10.9015
		7.9737	13.4941	9.0689	12.516
		7.4315	13.3279	8.7071	11.8136
		8.2037	13.2737	8.974	11.7506
		7.8756	13.0908	7.9936	11.3904
		7.7891	13.4889	9.0321	11.776
		7.8262	13.8775	9.7585	12.5018
		8.0881	13.5267	8.94	10.9448
		7.4651	13.2279	8.9	11.0963
		7.3368	12.6004	8.4118	11.3392
		7.0929	12.7672	8.9304	11.2988
		9.8536	10.9057	7.2912	9.0834
		9.408	12.1781	7.9566	9.7227
		9.8539	12.0514	7.9871	9.7467
		11.0406	11.0668	8.0965	10.107
		10.1507	10.8565	7.5393	9.9074
		10.382	10.3106	7.741	9.9816
		10.8414	10.7748	7.3716	9.823
		11.5803	9.7793	7.0356	9.8972
		10.5104	10.084	8.2172	10.7232
		10.5053	10.3464	7.705	10.7577
		10.856	10.8206	8.0342	10.8024
		10.0888	13.7176	8.6576	10.9879
		8.949	13.2872	8.8003	11.7122
		9.3992	12.873	9.1154	10.9323
		9.3674	12.8996	8.5948	11.2891
		10.3898	12.8574	8.5561	10.5198
		9.7827	12.9686	8.3618	10.4597
		10.4455	12.293	8.6758	11.4789
		10.1875	13.2882	9.2146	11.0443
		9.95	13.8477	10.4463	12.3966
		9.5749	13.2587	9.6012	12.2171
		8.8459	12.3402	8.7047	10.6539
		9.1016	11.9872	8.7772	11.1046
		9.1562	12.8607	8.7646	11.3289
		9.3863	12.5592	9.6612	11.8014
		9.4646	13.2478	9.4169	11.4631
		9.3009	12.2957	9.5103	11.5436
		9.7726	12.8178	9.1973	12.1898
		9.6912	12.6213	9.1033	11.8973
		9.6337	12.3355	8.6933	11.0219
		9.8393	12.632	8.9887	11.5142
		9.7864	12.0617	8.6152	11.4446
		9.6865	12.8318	9.2656	11.7327
		9.1565	12.7183	9.0849	11.2502
		9.3802	12.4828	9.5248	11.4795
		9.8539	12.0984	8.8361	11.5074
		9.268	13.3293	8.9013	11.3134
		9.7596	12.8055	8.7462	10.7862
		10.3116	12.4814	8.5245	10.9792
		9.563	12.2806	8.1997	10.6361
		10.1118	11.8274	8.223	10.9476
		9.818	11.587	7.7216	10.1914
		9.4634	11.4463	8.3128	10.785
		9.8746	11.644	8.3163	11.6344
		9.4793	11.939	8.8737	11.9618
		8.4542	12.5888	8.8439	10.8684
		7.7156	12.627	8.2023	10.2998
		8.4099	12.7798	9.0793	12.11
		8.614	11.5103	8.077	10.1955
		8.0301	11.66	9.0586	11.5105
		7.4563	11.815	8.662	11.705
		7.4937	11.4382	8.2603	11.4894
		7.4159	12.0451	8.1965	11.3218
		7.5057	12.2057	8.3108	10.7332
		6.1457	13.2143	8.7605	9.0958
		6.9627	12.2061	7.8576	8.907
		6.7224	12.8608	8.0612	8.8321
		6.6197	12.5733	7.8204	9.2335
		6.4215	12.2591	7.8933	9.1153
		6.6684	12.9881	8.2731	9.6225
		6.9841	12.5927	7.7669	9.4218
		6.4652	12.8058	8.2603	8.8904
		6.7596	13.0045	8.3323	9.0136
		6.7042	13.1429	8.4347	10.0761
		6.7337	12.5408	7.8456	9.4655
		6.4044	13.711	8.5413	9.4635
		6.7873	13.7141	8.8128	10.0869
		6.3936	13.2423	8.3386	8.7827
		6.9856	13.533	8.6355	8.7047
		6.6273	13.0321	8.2703	9.0826
		6.4851	12.4833	8.4512	9.7024
		6.5189	13.0456	8.7313	9.4172
		6.5425	12.8782	8.2043	9.2992
		6.3397	12.9652	8.2083	9.2883
		6.6509	11.8799	7.847	8.8374
		6.2795	12.5087	8.0048	9.5216
		6.3776	12.7652	8.5109	9.7954
		6.3281	13.1728	8.6121	8.8267
		6.3749	12.1125	7.8514	8.7052
		6.4177	12.93	8.4756	9.0847
		6.5337	12.3546	8.0528	9.1706
		6.7611	13.2956	8.398	9.2635
		6.5916	13.1534	7.9702	9.0368
		6.225	12.4709	8.0819	10.1945
		6.9879	12.4445	7.672	9.8064
		6.669	11.9672	7.7093	9.9534
		6.7406	12.1983	7.9833	9.0783
		6.5419	13.3403	8.4925	8.9872
		6.9421	13.2791	8.0578	8.9911
		6.5955	13.0066	8.4943	9.0668
		6.6997	13.0844	9.0552	9.7944
		6.6525	13.1724	8.6514	9.33
		6.747	12.1654	7.5098	9.4267
		6.7855	12.5601	7.8274	9.6418
		6.8839	12.3107	7.4911	9.0701
		6.302	13.0022	7.6645	10.2499
		6.1959	12.8855	8.1786	10.2737
		6.329	13.1415	7.7919	9.1293
		6.3347	13.1371	8.1652	9.5745
		6.5433	13.8401	8.5616	9.8728
		7.0789	13.4292	8.5134	10.3146
		6.3714	13.1753	8.3489	10.5907
		6.6437	12.7475	8.1511	10.4459
		6.858	12.0611	7.3561	10.0235
		6.4493	12.62	7.5964	9.3631
		7.631	12.9352	7.6906	9.5035
		7.7813	11.8158	8.0608	10.0684
		6.7407	12.5832	8.3772	11.2901
		6.8104	12.2549	7.7407	9.6386
		6.5017	12.436	7.3226	8.6032
		6.4293	12.4209	8.0129	9.723
		5.9827	12.5349	8.2144	9.6309
		6.2787	13.1513	8.129	10.0163
		6.5167	12.901	8.0512	9.4825
		6.7582	13.3444	8.7518	9.4823
		6.5977	13.7308	8.3743	9.4444
		6.9004	12.7941	8.0131	9.1712
		6.3162	12.9584	7.9167	9.2863
		6.879	12.5507	7.4309	8.6716
		6.6922	11.9586	7.854	9.2156
		6.3762	13.003	8.1547	8.9361
		6.5494	12.5112	7.8732	9.4466
		6.8938	13.2636	8.6372	8.8374
		6.4027	13.7056	8.7139	9.7295
		6.5643	13.5612	9.0134	9.2663
		6.3817	14.0298	8.9289	10.633
		7.0222	14.2299	8.4415	9.5007
		6.6019	13.5682	8.1321	9.9357
		6.1804	13.0568	7.7653	9.0938
		6.7173	13.1697	8.2753	9.6254
		6.7959	12.7886	7.8406	8.7761
		6.3877	13.9996	8.5011	8.4281
		6.4696	12.7816	8.1294	8.6502
		7.0072	13.1352	8.1189	9.0158
		6.4882	13.6443	8.2463	8.5147
		6.4633	13.0834	8.1312	8.7138
		6.857	12.6616	7.7869	8.6441
		7.0558	13.5119	8.4203	8.6936
		6.4733	13.5151	8.2992	8.4738
		6.7512	12.6769	7.6873	7.7797
		6.5815	12.6539	7.6414	8.0142
		6.2581	13.6321	8.3056	9.0529
		6.2306	12.9823	8.2056	8.7638
		6.7247	12.3452	7.5785	9.0613
		6.4844	12.3678	7.5893	8.6534
		6.2099	12.7464	8.2086	8.8915
		6.0126	12.8242	8.0121	9.0694
		6.4936	12.6523	8.0662	8.8866
		6.3194	12.926	7.8711	8.7918
		6.389	12.8052	7.7373	8.8424
		6.2934	12.5149	8.062	9.6851
		6.3167	12.3429	7.6859	8.479
		6.8412	11.8997	7.5485	8.8197
		6.667	11.8629	7.6817	8.0221
		6.7119	13.2452	8.3294	8.5911
		6.706	13.4813	8.28	8.7157
		7.4885	13.391	8.3879	9.9024
		6.61	13.5594	8.4827	8.9891
		7.0841	13.4449	8.5939	8.6725
		6.6133	13.4786	7.8306	9.8548
		6.3741	13.6372	8.8256	9.6587
		6.4732	13.3376	8.2592	9.7351
		6.6788	13.386	8.7568	9.2451
		6.8395	12.7752	8.3109	8.9916
		6.4031	13.1336	8.4693	9.0945
		6.4518	12.9495	8.1629	8.9032
		6.3865	12.8565	7.8484	8.7124
		6.2272	13.3095	8.5108	9.7207
		6.1387	12.9322	8.1459	9.7297
		6.7057	11.8892	7.6083	10.0109
		6.3434	12.7352	7.9791	9.1703
		6.5597	12.5867	7.9816	9.8727
		6.3025	13.4241	8.4256	9.2836
		6.3613	11.9355	7.6653	9.4003
		6.4919	13.252	8.4204	9.431
		6.3943	13.2496	8.4468	9.0433
		6.9127	13.442	8.486	8.6982
		6.4903	12.8466	7.7554	8.6053
		6.3921	13.8324	8.5146	8.5213
		6.1922	12.2319	8.2555	9.476
		6.862	12.8635	8.3577	8.8894
		6.239	13.849	8.9813	9.3277
		5.9651	13.1284	8.4098	9.7747
		6.4305	12.4334	8.1006	8.6293
		6.4115	12.7801	8.5099	8.7093
		6.301	12.9438	8.2294	8.4837
		6.6225	13.1044	8.538	9.1111
		6.9786	13.1801	8.4212	8.8032
		7.0413	12.6001	8.0502	8.9024
		6.9651	13.0267	7.907	8.7726
		6.8912	13.1554	8.1781	9.1991
		6.6418	13.1001	8.0792	8.896
		6.7474	12.4696	7.6596	9.1132
		6.3795	11.6931	7.335	10.1822
		6.7925	13.104	7.9302	9.4649
		6.5496	12.6117	7.8673	9.5892
		6.6537	12.2296	7.9477	9.9823
		6.2811	12.4844	7.9732	9.6621
		6.2261	13.4263	8.575	9.1436
		6.5927	13.7282	8.8557	9.2789
		6.5589	12.8987	8.0928	9.1202
		6.2151	12.9599	8.3786	9.1181
		6.4523	12.8056	8.0741	8.8135
		6.3819	12.3168	7.4815	8.7434
		6.4172	12.094	7.7433	8.8809
		6.693	11.606	7.3491	9.2254
		6.1715	12.4464	7.788	9.4617
		6.3296	12.2029	7.5227	8.7436
		6.4193	12.2456	7.2623	8.7124
		6.4356	12.3836	7.7088	9.0174
		6.5157	12.0754	7.5613	8.7819
		6.8863	12.2409	7.9074	9.1043
		6.3108	12.2709	7.6115	10.0721
		6.705	11.9622	7.5788	10.263
		6.2467	12.4688	7.7656	9.6512
		6.4387	12.8872	8.3377	9.9255
		6.3404	13.4417	8.6987	9.2911
		6.202	13.5924	8.9902	9.7409
		6.4948	12.9104	8.6443	10.2328
		6.4527	12.367	7.9183	8.5641
		6.8311	12.4512	7.7723	8.8958
		6.8856	12.6681	8.0721	8.7639
		6.4273	12.7574	8.4263	8.8008
		6.2676	12.5351	7.851	8.4849
		6.6309	12.7988	8.3832	9.0269
		6.319	12.856	8.7083	9.1689
		6.4205	13.8006	9.0108	8.962
		7.221	12.6993	8.2108	8.7874
		6.4418	13.4657	8.8824	9.1183
		6.9052	13.7148	8.6021	8.7161
		6.6375	13.4955	8.4037	9.4009
		6.3379	14.0872	9.171	9.816
		6.7114	12.957	8.15	8.5983
		6.6701	12.4794	8.0638	9.0329
		6.4816	13.177	8.0522	9.5255
		6.5193	12.3412	7.9224	8.7123
		6.6502	13.337	8.6624	8.9349
		6.5114	12.1725	7.6528	8.7177
		6.4573	12.8945	8.2393	9.1556
		6.544	12.2635	7.6572	9.0025
		6.2752	13.0841	8.5213	8.6899
		6.7372	12.2495	7.8349	9.5818
		7.0817	13.6811	9.3551	10.1676
		6.6029	12.8857	8.4024	9.9588
		6.4355	13.2643	8.0548	8.7532
		6.5463	12.6483	7.9737	9.4373
		6.7209	12.2137	7.5674	9.3923
		6.4384	12.0502	7.6199	9.4972
		6.3716	12.4187	8.179	9.4398
		6.4085	12.5859	7.9719	9.0264
		6.291	12.8833	8.0603	8.5623
		6.7194	12.1171	7.9837	9.9232
		6.3936	12.3899	8.0284	9.0119
		6.8052	11.9125	7.5969	8.2833
		6.6527	13.1165	8.1569	8.5834
		6.944	12.7296	7.9488	8.683
		6.8694	13.2211	8.336	9.0694
		6.4948	12.5252	8.1144	8.9461
		6.2453	12.5361	7.998	9.2717
		7.0142	12.3994	7.6694	9.0026
		6.6201	12.7808	8.4871	8.784
		6.3292	12.277	7.3045	8.1311
		6.7033	13.4185	8.6512	8.8609
		6.6554	12.6614	7.8826	8.6655
		6.5515	13.1996	8.5769	8.2727
		6.6488	13.1442	8.2652	9.6546
		6.1915	13.4153	8.5886	9.492
		6.3603	12.6372	7.5656	8.8261
		7.2728	12.0288	7.6049	8.5517
		6.2726	13.2518	8.351	8.6504
		6.6991	13.0352	8.0441	8.8488
		6.7854	12.8113	7.8811	9.0223
		6.3609	12.5713	7.4611	8.3884
		6.9838	12.1286	7.3522	8.8318
		7.2992	11.1861	6.7642	7.6264
		7.893	11.6714	7.16	7.6034
		7.6543	10.8774	6.3815	7.7756
		8.0698	11.0763	6.6596	7.1856
		7.2452	11.7569	7.3694	7.8637
		6.8271	12.2898	7.0234	7.9238
		6.543	12.7564	8.4042	9.0397
		6.6181	12.9341	8.1814	8.9341
		6.0848	13.6005	8.5653	8.9379
		6.2216	13.2193	8.5888	9.1163
		6.3953	13.4437	8.5971	9.0149
		6.5391	13.0277	8.3707	8.4947
		6.2281	14.1092	8.8612	9.3331
		6.7797	13.1307	8.9044	9.1118
		6.6369	13.2663	8.4569	9.1216
		6.6435	12.5804	7.9025	9.026
		6.6793	12.2311	7.3011	8.5411
		6.5631	12.9329	8.4351	8.3595
		6.521	13.0618	8.2554	8.4569
		6.3538	13.7636	8.8134	8.6026
		6.3966	12.2408	7.5547	9.0748
		6.4735	13.0828	8.2095	9.3951
		6.6042	13.9157	8.9799	9.3773
		6.7367	12.8776	8.1066	9.5281
		6.7363	12.1746	7.2564	8.9394
		7.3594	12.475	7.6733	8.9274
		6.718	13.0221	8.3121	9.1527
		6.6979	12.0955	7.5097	7.9572
		6.9872	12.8107	7.9851	9.0296
		6.8089	12.5001	8.0984	9.7725
		6.7974	12.8944	8.2467	9.3129
		6.8845	13.309	8.284	8.3776
		6.5261	12.5653	7.5844	9.1081
		6.9171	12.3842	7.4925	9.2401
		6.782	12.1792	7.4231	8.9986
		6.655	12.7512	7.978	8.6738
		6.3301	12.6427	7.6116	8.8435
		6.9503	12.7143	7.7887	8.4019
		7.1884	12.8971	7.5907	8.8018
		7.0142	12.5758	7.642	8.5106
		6.4839	12.5121	7.75	7.9926
		6.7215	12.3676	7.4101	8.6403
		6.4407	12.1892	7.2266	8.5347
		6.4642	12.3969	7.4134	8.5352
		6.3749	12.3169	7.1421	8.6748
		6.5176	12.304	7.4408	8.8599
		7.1694	12.4155	7.2502	8.9324
		6.3853	13.0415	7.9187	9.5909
		6.7985	13.3671	8.1207	8.2926
		6.7459	12.8993	7.8219	8.1622
		6.509	13.7226	8.3168	8.4143
		6.6886	13.6121	8.0703	8.1007
		6.596	12.94	7.6797	7.8081
		6.5372	13.6786	8.1622	8.6005
		6.9414	12.6876	7.775	8.9489
		6.5123	13.0194	7.6265	9.4925
		6.4549	13.5477	8.2307	9.3181
		6.4695	12.039	6.6822	8.635
		6.6331	12.199	7.0297	8.7234
		7.7042	11.642	6.7013	8.5711
		7.2455	11.8781	7.2717	8.3762
		7.9662	11.2684	6.853	8.6274
		7.792	12.1713	7.8347	8.8201
		7.9896	12.9961	8.3029	9.1218
		8.2072	13.8407	8.4477	8.1864
		8.0668	12.4466	7.6007	8.9151
		7.6638	12.9222	7.9578	9.0648
		7.5977	12.9311	8.0136	9.0625
		7.7709	12.2414	7.8911	9.689
		7.218	12.6652	7.7529	9.0481
		7.5652	12.4041	7.3578	8.6427
		6.8894	12.3812	7.5931	7.7515
		6.5703	13.5377	8.2055	8.2444
		6.5247	12.8273	7.6203	8.5876
		6.6956	12.4673	7.6149	8.2662
		6.3555	12.3671	7.47	8.6586
		6.6033	12.7875	7.5432	8.6817
		6.8541	11.7595	7.2384	8.4233
		6.9679	13.511	7.8213	8.8411
		6.5048	12.7384	8.0306	9.5761
		6.5794	12.2152	7.7276	9.7945
		6.8229	12.4	8.2894	9.671
		6.4116	12.6792	7.7598	8.8193
		6.3994	12.1349	7.208	8.2693
		6.7201	12.2276	7.4943	9.6503
		6.2479	12.6391	8.5928	10.4714
		6.6288	12.3314	8.2049	9.4692
		6.6407	12.436	7.6706	9.1947
		6.3721	13.6263	8.5262	8.9023
		6.6447	12.5491	7.7361	9.1306
		6.5963	12.8083	8.1589	9.074
		6.82	11.4512	7.2399	8.3945
		6.8319	11.3631	7.1713	9.0967
		6.4534	11.731	7.3347	8.8854
		6.7507	11.9875	7.0144	7.9965
		6.9548	12.6073	7.8805	7.843
		6.9921	14.2199	8.7373	6.3849
		6.533	12.417	7.4349	7.8844
		6.279	13.4292	8.3471	6.6569
		6.8046	12.0628	7.7956	8.7584
		6.7243	12.1538	7.7018	9.1613
		7.1589	12.391	8.0988	9.7957
		6.412	12.6998	8.3944	9.9742
		6.631	12.4373	7.8772	9.7945
		6.8106	12.9274	8.1808	8.7464
		5.9379	13.42	8.583	9.8986
		6.5799	12.6181	8.2128	9.4478
		7.1277	12.4225	7.983	8.8207
		6.7767	12.6693	8.056	8.3693
		6.7588	12.348	7.349	8.896
		6.4744	11.513	7.0226	8.6694
		7.2718	10.7268	7.3257	8.9999
		7.1062	13.1287	8.3802	9.641
		7.2124	11.5625	7.4207	8.7466
		6.6149	12.1564	7.8132	8.7585
		6.8534	12.4286	7.8103	8.7149
		6.9696	13.1255	8.5688	9.9052
		6.8425	12.3279	8.8794	9.1538
		6.8601	12.2806	8.2662	9.4001
		7.2409	12.5519	8.4076	9.4916
		6.9891	12.4759	8.2852	8.3898
		7.7311	12.4518	8.5102	8.8071
		7.328	12.314	8.007	8.7122
		7.0538	13.2045	8.2844	9.0766
		6.8122	13.8199	8.5999	9.2767
		7.2489	12.6262	7.92	8.611
		7.0286	11.9946	7.5914	8.0941
		6.6917	12.6105	8.0657	9.5697
		6.7927	13.286	8.7501	8.9634
		7.1223	12.8758	8.4845	8.5887
		7.099	12.3222	8.0982	8.5054
		7.0695	13.0848	8.8374	8.8077
		7.2104	12.3204	8.2761	9.0397
		6.4403	12.7278	8.7873	9.0558
		6.856	12.5775	8.4741	8.5908
		6.9415	12.7514	8.4773	8.8854
		7.3315	12.4215	7.9733	8.4962
		7.1199	12.616	8.6186	9.0733
		7.2575	12.577	8.3442	9.0038
		7.7207	12.3741	8.1867	8.5388
		7.8007	12.3245	8.3671	9.1785
		7.2451	12.5773	8.3712	7.6297
		7.3556	11.9699	8.3607	8.3281
		7.326	11.944	8.7578	8.8112
		7.1925	12.8885	8.6957	8.7955
		6.8976	13.0354	9.122	7.9202
		6.5354	12.9863	8.7192	8.3121
		6.9121	13.5385	9.0489	8.3369
		6.461	13.5722	9.3178	9.7192
		6.7615	12.6797	8.6108	9.1717
		6.3006	13.0655	9.2236	8.1912
		6.6883	12.9734	8.6831	9.0257
		6.6609	14.1042	9.6506	10.3502
		6.8851	13.216	8.806	8.9789
		6.6246	13.2948	9.0339	8.835
		6.767	13.9572	9.3736	8.7365
		7.1306	13.1209	8.7276	8.7019
		7.3477	13.1508	8.8352	8.7097
		6.6721	13.2098	8.8426	8.6347
		7.0439	12.4629	8.3407	7.8788
		7.1684	12.4062	8.5608	7.4789
		6.7712	13.466	8.8551	8.1564
		6.0188	12.5605	8.2082	8.1515
		6.4767	13.6727	9.1823	9.109
		6.6817	12.7444	8.5851	10.3684
		6.4923	12.5351	8.3056	8.9585
		7.3094	12.7145	8.3481	9.1787
		7.1092	12.5373	8.9691	8.6419
		7.4024	12.5741	8.4948	9.1351
		6.8499	12.7489	8.1652	8.1051
		6.9299	12.0607	8.0994	8.2956
		6.9668	11.5741	7.9339	9.1436
		7.0291	11.5892	8.0245	8.4198
		6.3145	11.3944	7.8042	8.5852
		6.6612	13.0328	8.4148	9.1439
		6.6447	14.0031	9.2794	8.1089
		6.8229	12.7225	8.2973	7.7236
		6.352	13.1778	8.5664	7.8472
		6.7277	14.4456	9.3814	7.7673
		6.5939	14.6534	9.8122	7.3449
		6.3821	12.9963	8.6961	7.6902
		6.3173	14.3472	9.4193	7.5303
		6.4991	14.3603	9.4961	7.9055
		6.4178	14.8746	9.8312	8.4745
		6.3927	14.3078	9.3883	7.7134
		7.4024	13.8124	9.4914	7.2068
		7.5038	13.2087	8.8469	7.2522
		7.7023	13.953	9.2965	6.6958
		6.9292	14.5717	10.2202	7.5208
		7.2097	14.4321	9.7569	7.1679
		7.3179	13.9007	9.0681	7.2363
		6.9597	13.9481	9.3314	7.6326
		7.2421	12.7028	8.6556	7.3146
		6.8837	13.3527	9.0583	7.7674
		6.7132	13.0864	8.9938	8.4879
		7.4271	13.3849	8.9966	8.0152
		7.0965	14.046	9.5947	7.8339
		6.895	13.9432	9.7098	7.9313
		6.9944	12.8533	8.5073	7.6987
		7.4568	13.5523	8.878	7.4127
		6.6711	14.9453	10.2244	7.8278
		6.4811	14.8252	10.2551	7.7339
		7.251	13.4444	9.2609	7.7243
		6.5349	14.1717	9.3877	8.2921
		7.0709	13.9243	9.5913	7.4333
		6.4628	13.0007	9.0185	8.0507
		6.7638	14.1294	9.3374	7.3215
		6.7517	14.4342	9.707	7.9479
		7.119	14.1437	9.5439	7.747
		6.4915	14.2068	9.7558	8.0621
		6.6717	13.7455	9.272	7.8148
		6.5528	13.7979	9.1049	6.9256
		6.4642	14.7911	10.3058	7.3463
		6.639	13.8144	9.0356	6.8899
		7.458	15.2848	10.2486	6.7442
		5.9574	15.3844	10.4491	7.8626
		6.511	15.1142	10.4178	7.3182
		6.1593	13.59	8.631	7.723
		6.4199	14.5034	8.7247	8.2465
		6.7201	12.0904	7.3807	8.269
		6.424	12.2295	8.0839	7.9599
		7.13	11.3944	7.6286	7.608
		6.2723	12.4232	8.0367	7.8758
		6.2726	13.4279	8.6565	7.3947
		6.612	13.0993	8.335	7.121
		6.6713	13.1573	8.1414	6.758
		6.8661	12.993	8.34	7.1656
		6.8314	13.2695	8.5345	7.643
		7.2851	13.8833	9.3718	6.8923
		6.8682	14.1555	9.5336	7.6653
		7.1963	15.2724	10.1431	6.9716
		6.8264	15.9544	11.1277	8.1652
		6.7871	15.1574	10.0601	7.8504
		6.9282	14.4219	9.6615	7.5352
		6.8604	14.7708	10.0682	8.2139
		6.9361	14.1437	9.2346	7.8455
		6.6328	14.5887	9.8922	7.6968
		6.8707	14.1708	8.9058	7.2514
		7.0667	14.3182	9.4159	7.2643
		6.5259	14.0899	9.2918	7.4381
		6.6035	13.5001	8.5176	7.392
		6.3616	13.3744	8.9637	7.1325
		6.6513	13.376	8.7579	6.8881
		6.7024	13.167	8.5651	6.5914
		6.5899	12.8717	7.9028	6.0781
		6.5476	13.3679	8.7893	6.9905
		6.7013	12.7922	8.2472	7.5792
		6.8679	12.9359	8.8203	8.1897
		7.1902	12.8359	8.1202	6.8479
		6.6947	11.6069	7.1486	7.2529
		6.5278	11.6534	7.6714	8.1788
		6.5528	11.7048	7.2991	7.4633
		6.6875	12.3001	7.9449	6.5824
		6.7381	13.0584	8.1772	6.9572
		6.5785	13.0956	8.4534	6.8612
		6.7748	12.6544	8.2405	7.6079
		6.801	13.0446	8.1684	7.1236
		6.8138	13.3555	8.4624	6.7365
		6.5757	13.4801	8.755	6.7464
		6.8399	13.1698	8.4883	6.8976
		6.9065	13.7324	9.0196	7.0471
		7.0111	13.5594	8.8686	7.0644
		6.5232	14.3531	9.7913	7.6349
		6.6263	14.11	9.2689	7.1926
		6.6168	14.0657	9.3549	7.0766
		6.5882	14.4531	9.4104	7.6115
		6.9452	14.1254	9.5668	7.0253
		6.8538	13.773	9.2718	7.1247
		7.0528	13.4734	8.9213	7.2479
		6.3709	14.1349	9.3422	7.0113
		6.2628	14.4394	9.6195	7.2691
		6.5689	14.9996	10.2343	6.8425
		6.5157	14.4841	9.737	7.1136
		6.6346	15.1202	10.2224	7.0646
		6.5318	14.8241	10.0554	6.7664
		6.4503	15.0194	10.1245	6.0122
		6.5432	14.7469	9.7402	6.0954
		6.2192	15.0155	10.4955	5.391
		6.096	13.5094	8.8381	5.2518
		6.8397	12.7213	7.9103	4.987
		6.8612	11.902	6.8889	4.7883
		6.2547	13.7985	8.5375	5.2561
		6.816	13.1395	7.6035	5.3126
		6.5428	13.3512	7.7358	5.132
		6.6704	12.791	7.0157	4.538
		6.6314	13.4792	7.5585	5.0389
		6.8586	12.5309	7.2011	5.3292
		6.9106	12.3009	7.4814	5.2265
		6.6766	13.3108	7.9239	5.2617
		6.5925	12.4036	7.0454	4.9883
		6.4279	12.1007	6.4852	4.4044
		6.5409	12.6138	7.1825	4.7192
		6.7049	12.4127	6.9244	4.1944
		6.4238	11.7301	6.7326	5.3233
		6.4236	12.3235	7.3909	5.1025
		6.8577	12.3426	6.8801	4.8241
		6.7779	13.5835	7.6415	4.7921
		6.9959	13.4864	7.9614	5.1655
		6.8102	13.1514	7.4054	4.8725
		6.5592	12.7953	6.924	4.7305
		6.6911	12.9739	7.4955	5.275
		6.7516	13.1313	7.8402	5.0064
		6.947	12.5571	7.0224	4.7936
		6.319	12.7355	7.6483	4.9551
		6.6754	12.3145	7.2449	4.7593
		6.5609	11.6894	6.5102	5.4306
		6.2846	11.2609	5.7884	6.7135
		6.6409	11.3838	6.6804	5.7454
		6.6106	12.5212	6.8676	5.156
		6.9843	10.7374	6.1352	5.5222
		6.3907	10.9935	5.9716	4.7986
		6.7388	12.1279	7.0717	5.419
		6.8631	11.9156	6.5989	4.8602
		6.8782	10.6129	5.6014	6.7079
		6.412	11.3268	5.3599	6.4906
		6.6517	11.136	5.8913	5.0942
		6.6833	11.0891	5.7308	6.3183
		6.5296	11.0611	5.5499	7.434
		6.7904	10.6286	5.4546	6.3663
		6.8108	10.849	5.3927	6.4604
		7.0927	11.5038	6.4064	5.3931
		6.4874	13.7193	7.6385	5.0249
		6.6814	13.0204	7.276	4.7375
		6.9833	13.2744	7.4164	5.3039
		6.655	13.11	7.5272	4.7673
		6.5071	12.9073	7.4906	4.6482
		6.5565	12.562	7.0934	4.8213
		6.8937	13.0439	7.4246	5.0418
		6.6676	13.5328	7.27	4.8659
		7.072	13.4285	7.541	5.2305
		6.6291	13.3879	7.1511	5.2767
		6.7245	12.7827	6.2031	6.9057
		6.4721	12.2915	6.7997	5.3999
		6.1837	11.7922	6.2482	5.0476
		7.2383	10.5808	5.9934	4.7899
		6.5819	10.2967	5.4557	6.9446
		6.7873	10.1934	5.3683	6.5802
		6.6419	10.6528	5.569	7.1385
		6.6339	11.6509	6.5229	6.8851
		6.9799	11.2735	5.8355	6.7173
		6.8354	10.9249	5.4289	7.055
		6.3202	11.5612	6.1156	6.6963
		6.3517	10.2113	5.5456	6.5721
		6.5262	10.7526	5.5543	6.7315
		6.6355	10.6706	5.7114	5.5504
		6.952	10.5269	5.5001	5.888
		6.5963	11.2377	6.1475	7.3191
		6.6535	10.5446	5.678	6.7978
		6.5532	12.9184	7.4162	5.1378
		7.1063	10.9454	6.5382	5.6653
		7.0735	11.3718	6.5889	5.4525
		6.7518	10.7107	5.9706	5.6104
		6.6442	12.0648	7.1448	4.7925
		6.3177	10.9261	6.4256	5.3838
		6.2342	10.715	6.2846	5.4534
		6.5665	10.9576	5.8796	5.0724
		6.7951	12.0046	6.4754	6.339
		6.3014	11.1636	6.0918	5.1008
		6.3218	10.8795	6.1486	5.2525
		6.506	11.3103	6.4336	5.7636
		7.0002	10.542	6.085	5.0843
		6.2503	11.1491	6.4919	5.6416
		6.5044	10.5571	5.989	5.0041
		6.2511	10.8173	6.3257	6.0138
		6.394	10.7473	5.9098	5.8779
		6.5488	10.9817	6.5018	4.8564
		6.5188	11.0186	6.1953	5.2352
		6.1513	11.4261	6.4128	5.8548
		6.6245	11.4377	6.5549	5.6339
		6.7912	11.0775	6.3574	4.935
		6.794	11.0258	6.2568	5.2849
		6.9963	10.5091	5.8943	5.2011
		6.7849	11.9338	6.5957	5.5802
		6.7863	11.9132	6.5249	5.501
		6.6129	10.9266	6.348	5.6517
		7.0072	10.9114	6.2511	4.8594
		6.8679	10.5313	5.9058	4.7603
		6.9193	10.6358	5.983	5.388
		6.4935	10.9108	6.1398	5.6937
		6.7457	10.5758	6.3676	5.1542
		6.9335	10.9785	6.0762	4.7239
		6.7103	10.5359	6.2108	4.8064
		6.5628	11.5218	6.4451	5.7903
		6.8592	10.6632	5.6364	5.255
		6.7377	11.7827	6.4003	4.7198
		6.5768	11.0971	6.4297	4.2951
		6.2216	11.0601	6.1785	5.5768
		6.0474	10.8951	5.8505	5.3957
		6.1768	11.2996	6.0885	5.3614
		5.7862	11.1485	6.3775	6.6461
		6.2607	11.2187	6.17	4.8372
		6.0077	11.6592	6.4181	5.1185
		6.5271	12.1581	7.1718	5.1313
		6.4017	12.1906	6.8657	4.9965
		6.4423	11.1715	6.5005	5.0847
		6.6244	11.2366	6.2436	5.5807
		6.2875	11.1163	6.1341	4.8687
		6.1086	10.6511	6.1467	6.0162
		6.3662	11.3343	7.0268	5.6443
		6.2557	11.8306	6.4881	5.2065
		6.7249	10.7469	6.2313	5.028
		6.5336	11.0555	5.8589	5.1358
		6.4753	11.6542	6.5181	5.3184
		6.452	11.448	6.2159	5.2929
		6.4644	11.7095	6.0806	6.4049
		6.5333	11.5152	6.3291	5.736
		6.5491	11.6902	6.4431	6.7114
		6.8121	12.4487	7.4056	5.7738
		6.3478	10.9183	6.1433	5.228
		6.6611	11.1694	6.1311	5.0622
		6.4535	10.8418	5.5636	6.4688
		6.3848	11.5451	6.5979	4.8397
		6.4816	13.1314	7.6264	5.1012
		6.3437	11.8272	6.5941	4.8633
		6.2854	11.8364	7.1576	4.9349
		6.2342	11.5002	6.7608	5.1404
		6.5674	10.5738	5.728	5.6766
		6.5591	10.7741	6.1053	5.5158
		6.7146	10.2713	5.4787	6.0717
		6.5856	11.3272	6.2834	6.1766
		6.7472	10.7132	6.2838	5.8227
		6.8228	11.3197	6.4287	6.3831
		6.564	11.3396	6.6392	5.537
		6.7072	11.3085	6.648	5.0969
		6.9687	11.9683	7.1384	5.6505
		6.8752	11.9854	7.1573	5.5153
		7.0304	11.4039	6.6197	4.8504
		6.4961	13.1689	7.9722	5.6659
		6.6005	12.7772	7.07	4.3666
		6.3331	13.4865	7.5268	5.0891
		6.8073	11.9772	6.2551	5.641
		6.3397	11.33	6.4062	4.6902
		6.8603	11.6372	6.3589	5.734
		6.7653	11.7756	6.4158	5.2725
		6.5875	12.0199	6.4911	5.6225
		6.6976	11.2963	5.9862	5.2298
[truncated: 28,002 more rows]

## Sheet: Glycans
		Distance								NAG1			NAG2			BMA3			MAN4			MAN5
		Glycan-LIG	NAG110	NAG111	BMA112	MAN113	MAN114			Zbiór danych (koszyk)	Częstość	%	Zbiór danych (koszyk)	Częstość	%	Zbiór danych (koszyk)	Częstość		Zbiór danych (koszyk)	Częstość		Zbiór danych (koszyk)	Częstość
		7.6243	11.2265	8.1504	12.6674	15.4123	10.3913		2	2	0	0	2	0	0	2	0	0	2	0	0	2	0	0
		7.4626	10.5417	8.0862	12.4592	14.7327	9.7789		2.2	2.2	0	0	2.2	0	0	2.2	0	0	2.2	0	0	2.2	0	0
		7.3222	10.9533	8.3547	12.3979	14.7243	9.8921		2.4	2.4	0	0	2.4	0	0	2.4	0	0	2.4	0	0	2.4	0	0
		7.8054	10.6855	8.412	12.9157	16.4029	10.1013		2.6	2.6	0	0	2.6	0	0	2.6	0	0	2.6	0	0	2.6	0	0
		7.4172	10.2809	8.0617	12.7205	15.9545	9.9434		2.8	2.8	0	0	2.8	0	0	2.8	0	0	2.8	0	0	2.8	0	0
		6.5941	10.3377	7.712	11.8804	14.5776	9.4897		3	3	0	0	3	0	0	3	0	0	3	0	0	3	0	0
		7.7097	10.2334	8.3955	12.7506	15.4001	9.9923		3.2	3.2	0	0	3.2	0	0	3.2	0	0	3.2	0	0	3.2	0	0
		7.5387	10.7449	8.0829	12.7098	15.6573	10.047		3.4	3.4	0	0	3.4	0	0	3.4	0	0	3.4	0	0	3.4	0	0
		6.9397	10.4248	7.7549	11.7537	14.8992	8.8619		3.6	3.6	0	0	3.6	2	6.66667e-05	3.6	0	0	3.6	0	0	3.6	3	0.0001
		6.7682	10.5614	7.7317	11.012	14.4145	9.3543		3.8	3.8	0	0	3.8	5	0.000166667	3.8	1	3.33333e-05	3.8	0	0	3.8	7	0.000233333
		7.033	10.0231	7.6251	12.6484	16.364	10.2183		4	4	0	0	4	62	0.00206667	4	6	0.0002	4	0	0	4	47	0.00156667
		6.9821	10.9128	7.7643	12.5524	15.9246	9.8889		4.2	4.2	0	0	4.2	247	0.00823333	4.2	26	0.000866667	4.2	0	0	4.2	102	0.0034
		6.9743	10.9115	7.7386	11.8295	14.5883	9.6128		4.4	4.4	0	0	4.4	549	0.0183	4.4	63	0.0021	4.4	0	0	4.4	118	0.00393333
		7.1719	10.8092	7.998	12.0643	15.6559	9.1338		4.6	4.6	0	0	4.6	1129	0.0376333	4.6	117	0.0039	4.6	0	0	4.6	214	0.00713333
		8.074	11.751	8.5517	12.7423	16.3078	8.8002		4.8	4.8	0	0	4.8	1816	0.0605333	4.8	147	0.0049	4.8	0	0	4.8	330	0.011
		7.4846	10.5851	7.9175	12.7104	15.6233	9.0945		5	5	0	0	5	2102	0.0700667	5	223	0.00743333	5	0	0	5	370	0.0123333
		7.2073	10.8739	7.961	11.7301	14.5289	8.4388		5.2	5.2	0	0	5.2	1592	0.0530667	5.2	420	0.014	5.2	0	0	5.2	445	0.0148333
		7.9865	11.0903	8.0045	12.7814	15.4323	9.5963		5.4	5.4	0	0	5.4	1073	0.0357667	5.4	829	0.0276333	5.4	2	6.66667e-05	5.4	614	0.0204667
		6.9653	10.4169	7.3712	12.1527	15.3553	8.5561		5.6	5.6	0	0	5.6	1148	0.0382667	5.6	1016	0.0338667	5.6	9	0.0003	5.6	1011	0.0337
		7.3169	10.8903	8.272	12.5825	16.4601	8.5433		5.8	5.8	0	0	5.8	1242	0.0414	5.8	1171	0.0390333	5.8	30	0.001	5.8	1447	0.0482333
		7.4953	10.9129	8.0599	12.682	16.8494	8.5643		6	6	0	0	6	1052	0.0350667	6	1235	0.0411667	6	48	0.0016	6	1805	0.0601667
		7.5447	10.6943	8.3303	12.6628	17.1178	9.1197		6.2	6.2	0	0	6.2	790	0.0263333	6.2	1176	0.0392	6.2	52	0.00173333	6.2	1715	0.0571667
		7.6081	10.7667	8.028	12.2793	15.5443	8.6953		6.4	6.4	1	3.33333e-05	6.4	579	0.0193	6.4	896	0.0298667	6.4	77	0.00256667	6.4	1806	0.0602
		7.0611	10.3214	7.9011	12.3846	16.0842	8.1653		6.6	6.6	2	6.66667e-05	6.6	492	0.0164	6.6	770	0.0256667	6.6	99	0.0033	6.6	1575	0.0525
		8.333	11.0995	8.3248	13.4223	16.9581	9.6269		6.8	6.8	4	0.000133333	6.8	475	0.0158333	6.8	840	0.028	6.8	86	0.00286667	6.8	1260	0.042
		8.5983	12.6302	9.2064	13.3655	15.2001	10.4271		7	7	24	0.0008	7	567	0.0189	7	755	0.0251667	7	102	0.0034	7	1103	0.0367667
		8.0269	11.9263	7.9911	12.3528	15.2757	9.2781		7.2	7.2	31	0.00103333	7.2	541	0.0180333	7.2	683	0.0227667	7.2	108	0.0036	7.2	892	0.0297333
		8.038	11.8038	9.628	13.3313	16.4293	9.9783		7.4	7.4	58	0.00193333	7.4	506	0.0168667	7.4	513	0.0171	7.4	148	0.00493333	7.4	820	0.0273333
		7.6148	11.1781	8.0569	12.2223	15.1182	8.9308		7.6	7.6	110	0.00366667	7.6	462	0.0154	7.6	459	0.0153	7.6	217	0.00723333	7.6	731	0.0243667
		7.9344	10.4183	7.5835	12.9005	14.8657	10.8416		7.8	7.8	142	0.00473333	7.8	475	0.0158333	7.8	382	0.0127333	7.8	326	0.0108667	7.8	671	0.0223667
		7.8375	10.8105	8.0061	12.92	15.853	10.6464		8	8	139	0.00463333	8	551	0.0183667	8	455	0.0151667	8	515	0.0171667	8	685	0.0228333
		7.414	10.8879	7.688	12.4108	16.2484	9.4022		8.2	8.2	223	0.00743333	8.2	656	0.0218667	8.2	543	0.0181	8.2	676	0.0225333	8.2	569	0.0189667
		9.1245	12.5895	9.4671	13.4586	16.9546	8.9814		8.4	8.4	228	0.0076	8.4	712	0.0237333	8.4	682	0.0227333	8.4	807	0.0269	8.4	522	0.0174
		9.0574	12.1497	9.5611	13.748	17.4388	10.1469		8.6	8.6	230	0.00766667	8.6	675	0.0225	8.6	855	0.0285	8.6	948	0.0316	8.6	543	0.0181
		8.7444	12.3611	9.4582	13.3597	16.8524	9.3618		8.8	8.8	277	0.00923333	8.8	687	0.0229	8.8	829	0.0276333	8.8	900	0.03	8.8	521	0.0173667
		8.3996	12.3193	9.0676	12.479	15.6641	9.3422		9	9	467	0.0155667	9	669	0.0223	9	840	0.028	9	738	0.0246	9	599	0.0199667
		7.8939	12.266	8.5003	11.1381	14.0987	7.3642		9.2	9.2	726	0.0242	9.2	729	0.0243	9.2	685	0.0228333	9.2	623	0.0207667	9.2	598	0.0199333
		7.5739	11.7074	8.5426	12.1166	15.6538	7.9495		9.4	9.4	1021	0.0340333	9.4	639	0.0213	9.4	566	0.0188667	9.4	517	0.0172333	9.4	618	0.0206
		8.3699	11.5141	9.0195	13.4732	17.2022	9.6961		9.6	9.6	1308	0.0436	9.6	686	0.0228667	9.6	536	0.0178667	9.6	478	0.0159333	9.6	542	0.0180667
		7.5162	11.607	8.6736	12.2513	16.5417	8.0065		9.8	9.8	1472	0.0490667	9.8	632	0.0210667	9.8	547	0.0182333	9.8	380	0.0126667	9.8	544	0.0181333
		7.3232	11.4411	8.2918	11.941	15.9122	7.3943		10	10	1474	0.0491333	10	580	0.0193333	10	517	0.0172333	10	318	0.0106	10	528	0.0176
		7.1374	11.2265	8.3473	12.2318	15.2626	8.6659		10.2	10.2	1761	0.0587	10.2	568	0.0189333	10.2	508	0.0169333	10.2	302	0.0100667	10.2	497	0.0165667
		7.171	11.0447	8.0949	12.023	15.1436	9.0027		10.4	10.4	1994	0.0664667	10.4	541	0.0180333	10.4	483	0.0161	10.4	278	0.00926667	10.4	479	0.0159667
		7.0155	11.6173	8.285	11.4888	14.8548	7.4987		10.6	10.6	1901	0.0633667	10.6	454	0.0151333	10.6	437	0.0145667	10.6	258	0.0086	10.6	419	0.0139667
		7.125	11.2027	8.0273	12.162	15.442	8.1947		10.8	10.8	1714	0.0571333	10.8	417	0.0139	10.8	395	0.0131667	10.8	239	0.00796667	10.8	406	0.0135333
		8.139	12.5432	9.5655	12.9875	16.99	8.5626		11	11	1334	0.0444667	11	359	0.0119667	11	422	0.0140667	11	275	0.00916667	11	369	0.0123
		8.4415	12.6885	9.6396	12.5486	16.9816	7.9061		11.2	11.2	1012	0.0337333	11.2	358	0.0119333	11.2	478	0.0159333	11.2	314	0.0104667	11.2	353	0.0117667
		8.0178	12.4025	9.1113	12.5054	16.2453	8.0732		11.4	11.4	925	0.0308333	11.4	335	0.0111667	11.4	482	0.0160667	11.4	363	0.0121	11.4	315	0.0105
		7.984	13.1817	10.0159	12.4642	16.5735	8.0375		11.6	11.6	951	0.0317	11.6	328	0.0109333	11.6	511	0.0170333	11.6	432	0.0144	11.6	310	0.0103333
		7.4096	12.5524	9.2712	12.7737	16.3528	8.2837		11.8	11.8	869	0.0289667	11.8	291	0.0097	11.8	485	0.0161667	11.8	513	0.0171	11.8	275	0.00916667
		7.5006	12.735	9.1072	11.6709	16.0079	7.5395		12	12	795	0.0265	12	316	0.0105333	12	439	0.0146333	12	623	0.0207667	12	262	0.00873333
		7.9418	13.0241	9.1996	11.7297	16.4432	6.879		12.2	12.2	717	0.0239	12.2	265	0.00883333	12.2	457	0.0152333	12.2	755	0.0251667	12.2	247	0.00823333
		7.1931	11.6761	7.8167	11.1173	15.0795	7.4692		12.4	12.4	695	0.0231667	12.4	201	0.0067	12.4	454	0.0151333	12.4	840	0.028	12.4	201	0.0067
		7.5526	12.1171	8.9223	12.2942	15.8442	8.5958		12.6	12.6	633	0.0211	12.6	179	0.00596667	12.6	451	0.0150333	12.6	931	0.0310333	12.6	199	0.00663333
		7.8053	12.5213	8.9941	11.7963	15.9781	7.7812		12.8	12.8	614	0.0204667	12.8	174	0.0058	12.8	443	0.0147667	12.8	891	0.0297	12.8	192	0.0064
		7.8462	12.951	9.2963	11.0352	14.5466	7.4027		13	13	535	0.0178333	13	149	0.00496667	13	418	0.0139333	13	735	0.0245	13	175	0.00583333
		7.0078	12.0127	8.6203	11.8474	15.2306	7.9778		13.2	13.2	496	0.0165333	13.2	160	0.00533333	13.2	339	0.0113	13.2	648	0.0216	13.2	160	0.00533333
		7.8639	13.0542	9.3512	11.9949	15.1988	7.189		13.4	13.4	399	0.0133	13.4	116	0.00386667	13.4	292	0.00973333	13.4	542	0.0180667	13.4	128	0.00426667
		7.2232	12.7108	8.8414	10.7612	14.2545	6.8666		13.6	13.6	374	0.0124667	13.6	122	0.00406667	13.6	336	0.0112	13.6	497	0.0165667	13.6	144	0.0048
		8.2109	13.7863	10.0578	11.4991	14.1295	7.051		13.8	13.8	382	0.0127333	13.8	112	0.00373333	13.8	287	0.00956667	13.8	474	0.0158	13.8	128	0.00426667
		8.3347	13.7433	9.9863	11.5031	15.0281	7.3254		14	14	364	0.0121333	14	93	0.0031	14	250	0.00833333	14	438	0.0146	14	122	0.00406667
		8.698	13.9384	10.5845	11.5753	15.6006	7.2993		14.2	14.2	393	0.0131	14.2	67	0.00223333	14.2	206	0.00686667	14.2	413	0.0137667	14.2	132	0.0044
		8.8218	13.9085	10.3887	12.0571	16.1442	7.4242		14.4	14.4	335	0.0111667	14.4	66	0.0022	14.4	230	0.00766667	14.4	355	0.0118333	14.4	82	0.00273333
		9.0537	13.6584	10.8076	12.829	16.9744	7.1229		14.6	14.6	391	0.0130333	14.6	49	0.00163333	14.6	169	0.00563333	14.6	398	0.0132667	14.6	108	0.0036
		10.1106	14.8116	11.7852	13.4754	18.5153	7.8094		14.8	14.8	379	0.0126333	14.8	33	0.0011	14.8	197	0.00656667	14.8	409	0.0136333	14.8	100	0.00333333
		8.709	13.419	9.8934	11.9826	17.0176	6.3866		15	15	337	0.0112333	15	20	0.000666667	15	196	0.00653333	15	404	0.0134667	15	83	0.00276667
		8.6869	12.7342	9.9649	12.6354	17.8724	7.1855		15.2	15.2	338	0.0112667	15.2	18	0.0006	15.2	185	0.00616667	15.2	416	0.0138667	15.2	74	0.00246667
		8.6601	12.8258	10.0307	12.4755	17.6361	6.6069		15.4	15.4	307	0.0102333	15.4	15	0.0005	15.4	200	0.00666667	15.4	385	0.0128333	15.4	65	0.00216667
		9.0546	12.7241	9.6785	12.9776	17.4692	7.1541		15.6	15.6	219	0.0073	15.6	13	0.000433333	15.6	166	0.00553333	15.6	415	0.0138333	15.6	53	0.00176667
		8.4433	13.1151	9.5412	11.9392	17.2985	6.4349		15.8	15.8	194	0.00646667	15.8	14	0.000466667	15.8	163	0.00543333	15.8	385	0.0128333	15.8	62	0.00206667
		8.7102	12.757	9.7049	12.4304	17.4069	6.7626		16	16	151	0.00503333	16	14	0.000466667	16	141	0.0047	16	446	0.0148667	16	44	0.00146667
		8.3552	12.9594	9.7428	12.2612	17.0769	6.8569		16.2	16.2	123	0.0041	16.2	6	0.0002	16.2	126	0.0042	16.2	437	0.0145667	16.2	50	0.00166667
		7.666	12.0969	9.3144	11.738	15.4683	6.3824		16.4	16.4	83	0.00276667	16.4	5	0.000166667	16.4	114	0.0038	16.4	523	0.0174333	16.4	41	0.00136667
		7.8939	12.5539	9.1281	11.9603	15.8939	6.4541		16.6	16.6	55	0.00183333	16.6	8	0.000266667	16.6	94	0.00313333	16.6	525	0.0175	16.6	39	0.0013
		8.4296	12.9446	10.284	12.6321	17.1444	6.999		16.8	16.8	59	0.00196667	16.8	4	0.000133333	16.8	113	0.00376667	16.8	479	0.0159667	16.8	36	0.0012
		8.4769	13.0598	9.9637	12.4965	17.0232	6.8623		17	17	61	0.00203333	17	3	0.0001	17	76	0.00253333	17	497	0.0165667	17	26	0.000866667
		9.0852	13.4986	10.8404	12.8455	17.2948	7.2379		17.2	17.2	43	0.00143333	17.2	2	6.66667e-05	17.2	62	0.00206667	17.2	443	0.0147667	17.2	33	0.0011
		9.2836	13.1108	10.4279	13.6704	18.0109	7.9909		17.4	17.4	32	0.00106667	17.4	0	0	17.4	51	0.0017	17.4	396	0.0132	17.4	23	0.000766667
		8.9559	12.8123	10.1401	12.8293	18.2933	7.5205		17.6	17.6	21	0.0007	17.6	3	0.0001	17.6	64	0.00213333	17.6	373	0.0124333	17.6	34	0.00113333
		9.3542	13.4871	10.5301	13.4187	18.6845	7.4823		17.8	17.8	22	0.000733333	17.8	0	0	17.8	47	0.00156667	17.8	348	0.0116	17.8	27	0.0009
		8.9196	13.2303	10.3103	12.8329	17.9331	7.3366		18	18	18	0.0006	18	0	0	18	39	0.0013	18	301	0.0100333	18	20	0.000666667
		8.0765	12.5427	9.4634	12.1386	17.1455	6.8485		18.2	18.2	16	0.000533333	18.2	0	0	18.2	38	0.00126667	18.2	305	0.0101667	18.2	8	0.000266667
		7.3339	11.7003	8.4079	10.5008	14.7449	6.3196		18.4	18.4	9	0.0003	18.4	0	0	18.4	33	0.0011	18.4	276	0.0092	18.4	17	0.000566667
		7.3638	11.8667	8.4104	11.1012	15.4491	6.7341		18.6	18.6	4	0.000133333	18.6	0	0	18.6	24	0.0008	18.6	250	0.00833333	18.6	17	0.000566667
		7.281	12.0298	8.3094	10.5759	15.5359	7.353		18.8	18.8	5	0.000166667	18.8	0	0	18.8	18	0.0006	18.8	236	0.00786667	18.8	7	0.000233333
		7.8623	12.9616	9.625	11.3384	16.0156	8.2017		19	19	1	3.33333e-05	19	0	0	19	17	0.000566667	19	192	0.0064	19	14	0.000466667
		7.6474	12.2049	8.8737	11.3183	16.6655	7.4044		19.2	19.2	1	3.33333e-05	19.2	0	0	19.2	11	0.000366667	19.2	173	0.00576667	19.2	9	0.0003
		7.0273	11.8519	8.1198	10.579	15.6992	7.4382		19.4	19.4	1	3.33333e-05	19.4	0	0	19.4	13	0.000433333	19.4	171	0.0057	19.4	11	0.000366667
		7.4131	12.3114	8.3951	10.2595	15.4499	9.0848		19.6	19.6	0	0	19.6	0	0	19.6	8	0.000266667	19.6	153	0.0051	19.6	4	0.000133333
		6.7112	11.9749	8.0511	10.0273	13.3906	9.6904		19.8	19.8	0	0	19.8	0	0	19.8	6	0.0002	19.8	126	0.0042	19.8	5	0.000166667
		7.2881	11.9783	7.9439	10.5139	14.4781	8.4561		20	20	0	0	20	0	0	20	4	0.000133333	20	114	0.0038	20	3	0.0001
		6.3164	12.0973	8.424	10.5597	14.6828	6.3293		20.2	20.2	0	0	20.2	0	0	20.2	6	0.0002	20.2	117	0.0039	20.2	9	0.0003
		7.3199	11.8328	7.9769	11.2089	13.7565	7.1195		20.4	20.4	0	0	20.4	0	0	20.4	10	0.000333333	20.4	100	0.00333333	20.4	4	0.000133333
		7.4193	11.9597	8.1663	10.9056	14.4391	7.9098		20.6	20.6	0	0	20.6	0	0	20.6	6	0.0002	20.6	112	0.00373333	20.6	2	6.66667e-05
		7.2734	11.9423	8.2186	10.037	13.231	7.0423		20.8	20.8	0	0	20.8	0	0	20.8	2	6.66667e-05	20.8	100	0.00333333	20.8	5	0.000166667
		8.1299	12.5984	8.623	11.0774	15.1547	8.1716		21	21	0	0	21	0	0	21	7	0.000233333	21	90	0.003	21	2	6.66667e-05
		7.9584	12.245	8.2077	10.6794	14.4709	7.2987		21.2	21.2	0	0	21.2	0	0	21.2	2	6.66667e-05	21.2	82	0.00273333	21.2	2	6.66667e-05
		7.6036	12.2653	8.7222	10.2022	14.6499	6.0069		21.4	21.4	0	0	21.4	0	0	21.4	2	6.66667e-05	21.4	77	0.00256667	21.4	1	3.33333e-05
		8.4318	13.0841	9.0728	10.3867	15.3004	6.3397		21.6	21.6	0	0	21.6	0	0	21.6	1	3.33333e-05	21.6	69	0.0023	21.6	2	6.66667e-05
		8.0867	12.4543	8.4375	11.5554	15.5207	8.1853		21.8	21.8	0	0	21.8	0	0	21.8	0	0	21.8	56	0.00186667	21.8	1	3.33333e-05
		7.0686	11.8664	8.3088	11.3884	15.5592	8.2837		22	22	0	0	22	0	0	22	2	6.66667e-05	22	41	0.00136667	22	2	6.66667e-05
		7.3457	11.8317	8.1974	11.0597	14.9563	7.6745		22.2	22.2	0	0	22.2	0	0	22.2	0	0	22.2	47	0.00156667	22.2	0	0
		7.5926	11.9469	8.4097	11.8137	14.8499	7.7304		22.4	22.4	0	0	22.4	0	0	22.4	1	3.33333e-05	22.4	43	0.00143333	22.4	1	3.33333e-05
		7.7198	11.5485	7.8709	11.7425	14.1231	7.6454		22.6	22.6	0	0	22.6	0	0	22.6	0	0	22.6	38	0.00126667	22.6	1	3.33333e-05
		6.9616	11.5614	7.587	11.087	13.0956	7.3983		22.8	22.8	0	0	22.8	0	0	22.8	0	0	22.8	30	0.001	22.8	2	6.66667e-05
		6.9199	11.3737	6.9675	10.7435	13.284	7.5107		23	23	0	0	23	0	0	23	0	0	23	22	0.000733333	23	1	3.33333e-05
		6.836	10.9056	6.8576	10.8041	13.6447	8.402		23.2	23.2	0	0	23.2	0	0	23.2	0	0	23.2	20	0.000666667	23.2	0	0
		7.5815	11.8757	8.153	11.0971	14.1623	8.4846		23.4	23.4	0	0	23.4	0	0	23.4	0	0	23.4	8	0.000266667	23.4	0	0
		6.5096	11.1269	6.6547	8.9755	11.9288	8.0826		23.6	23.6	0	0	23.6	0	0	23.6	0	0	23.6	11	0.000366667	23.6	0	0
		6.0895	11.0761	6.747	9.3532	11.4215	8.1698		23.8	23.8	0	0	23.8	0	0	23.8	0	0	23.8	8	0.000266667	23.8	1	3.33333e-05
		6.3441	10.6086	6.1477	9.5452	9.9108	8.8646		24	24	0	0	24	0	0	24	0	0	24	7	0.000233333	24	1	3.33333e-05
		6.2874	10.5255	5.7961	8.4198	10.8919	9.1634		24.2	24.2	0	0	24.2	0	0	24.2	0	0	24.2	3	0.0001	24.2	0	0
		6.2958	10.6321	6.0791	8.8614	11.158	8.81		24.4	24.4	0	0	24.4	0	0	24.4	0	0	24.4	3	0.0001	24.4	0	0
		6.2482	10.5325	5.9815	8.4994	10.9147	9.0714		24.6	24.6	0	0	24.6	0	0	24.6	0	0	24.6	7	0.000233333	24.6	0	0
		6.55	11.0343	6.373	8.2572	8.6632	8.8536		24.8	24.8	0	0	24.8	0	0	24.8	0	0	24.8	4	0.000133333	24.8	0	0
		6.3065	10.6108	6.5338	8.4984	9.2954	8.8888		25	25	0	0	25	0	0	25	0	0	25	2	6.66667e-05	25	0	0
		6.6564	10.8012	6.461	8.5671	9.2183	9.4987		25.2	25.2	0	0	25.2	0	0	25.2	0	0	25.2	1	3.33333e-05	25.2	0	0
		6.5219	10.9149	6.341	9.2087	9.9561	9.4193		25.4	25.4	0	0	25.4	0	0	25.4	0	0	25.4	3	0.0001	25.4	0	0
		7.2527	10.9439	6.8569	9.9271	10.5634	10.0493		25.6	25.6	0	0	25.6	0	0	25.6	0	0	25.6	1	3.33333e-05	25.6	0	0
		7.021	11.4522	7.7093	9.968	11.6562	10.4392		25.8	25.8	0	0	25.8	0	0	25.8	0	0	25.8	1	3.33333e-05	25.8	0	0
		7.1381	11.3291	7.1898	9.6946	12.4665	10.5156		26	26	0	0	26	0	0	26	0	0	26	0	0	26	0	0
		7.5598	10.8743	7.107	10.8333	10.6234	12.1121		26.2	26.2	0	0	26.2	0	0	26.2	0	0	26.2	1	3.33333e-05	26.2	0	0
		7.7323	10.8432	7.666	11.5007	11.9491	13.606		26.4	26.4	0	0	26.4	0	0	26.4	0	0	26.4	0	0	26.4	0	0
		7.8263	10.8719	6.7284	9.624	9.9846	12.4738		26.6	26.6	0	0	26.6	0	0	26.6	0	0	26.6	0	0	26.6	0	0
		7.9946	11.0897	7.0881	10.0114	10.2593	12.7568		26.8	26.8	0	0	26.8	0	0	26.8	0	0	26.8	0	0	26.8	0	0
		8.0686	10.9255	7.801	11.388	10.549	14.5008		27	27	0	0	27	0	0	27	0	0	27	0	0	27	0	0
		7.4136	11.1492	7.3366	10.2517	10.6353	11.4696		27.2	27.2	0	0	27.2	0	0	27.2	0	0	27.2	0	0	27.2	0	0
		7.4889	10.7684	7.9092	10.9888	11.3874	12.143		27.4	27.4	0	0	27.4	0	0	27.4	0	0	27.4	0	0	27.4	0	0
		8.2762	11.739	8.0606	12.267	12.6685	11.8911		27.6	27.6	0	0	27.6	0	0	27.6	0	0	27.6	0	0	27.6	0	0
		6.8368	10.9807	7.5246	10.5491	11.3903	10.2094		27.8	27.8	0	0	27.8	0	0	27.8	0	0	27.8	0	0	27.8	0	0
		7.87	11.5206	8.8265	12.0322	13.0459	11.613		28	28	0	0	28	0	0	28	0	0	28	0	0	28	0	0
		7.9914	11.5263	8.623	12.3617	14.6112	10.7989			Więcej	0	0	Więcej	0	0	Więcej	0	0	Więcej	0	0	Więcej	0	0
		8.2153	11.7687	8.7164	12.6636	14.6581	12.1721
		8.2016	10.8766	7.8522	12.0858	14.41	12.2262
		8.0252	10.4882	7.8658	12.5097	13.6439	12.0014
		7.0093	10.6358	7.4737	11.0362	14.1795	9.988
		7.9465	10.8669	8.0342	12.1268	14.312	11.0062
		8.5628	10.9822	8.1941	12.4258	15.4253	10.7875
		7.9104	11.1517	8.8236	11.8387	14.1803	11.6482
		8.0325	11.3159	8.586	12.117	15.1914	11.4634
		8.0464	11.2631	8.6307	11.5574	13.5103	11.3326
		7.5985	10.8218	7.4877	10.8891	12.7953	10.8467
		8.5644	11.5008	8.8181	13.2504	14.1907	12.1859
		7.9201	10.3099	8.31	12.4526	13.742	11.5957
		8.4296	10.9304	7.6544	12.6045	13.4651	11.9926
		8.2142	10.7929	7.8333	12.3115	14.6464	11.4109
		7.9343	10.1674	7.4475	12.4747	13.9237	12.2974
		7.7111	10.4907	7.5312	12.1226	13.1895	12.4983
		7.8463	10.4444	7.1362	11.5721	12.0266	12.2312
		7.5423	11.2128	7.8658	11.2265	12.1105	11.0982
		7.5335	11.095	7.8746	11.4831	13.1737	10.7466
		7.6516	11.7944	7.8223	10.5867	13.0889	10.1858
		7.3287	11.0602	7.7074	11.0141	13.6481	10.7805
		7.2013	10.9893	8.1469	10.7471	11.1054	11.9121
		7.1337	10.7614	7.4784	10.8479	13.1078	11.5681
		7.4796	10.8456	7.7718	10.7265	13.1628	11.0594
		7.7315	11.2263	7.9317	11.4827	14.5058	10.8487
		7.472	10.7222	7.78	10.691	11.7901	11.9386
		7.3472	10.2329	6.5333	10.3702	12.7941	11.1354
		8.0107	10.5213	7.6646	11.1706	13.0433	11.8938
		8.2824	11.5345	8.5111	11.6763	14.0958	11.6966
		8.6287	11.336	8.3045	12.1357	14.5263	11.4986
		7.1328	11.0689	7.7379	10.9177	13.1615	9.2927
		7.2937	10.7461	7.1924	10.3554	13.2407	11.2098
		7.8996	10.94	7.24	11.1534	14.1511	10.5841
		8.2697	11.3298	7.9479	11.7277	15.2648	10.7394
		7.6654	11.1069	7.4512	10.6884	14.5278	8.9812
		7.3616	11.1901	7.3733	10.4676	12.9949	9.9272
		8.258	11.5607	7.6446	10.9317	14.225	11.3382
		7.1588	10.9572	7.42	10.1588	12.7535	10.2926
		7.6949	10.7379	7.6385	10.9527	13.4784	10.5778
		7.4126	10.7627	7.1728	10.5156	12.6786	10.5421
		7.4956	11.2397	7.0718	10.5399	13.4248	10.8657
		7.3343	11.556	7.7184	9.7923	12.8337	9.6224
		7.2028	11.2644	7.2245	9.8491	13.8752	7.766
		7.5683	12.0257	7.7423	10.2991	14.6116	7.0489
		7.9768	11.4085	7.8067	10.9274	14.904	7.5031
		7.6461	11.2646	7.4898	10.013	15.3234	6.5394
		7.1331	10.8763	7.3081	10.4228	15.4431	6.9433
		8.196	11.2544	8.0751	11.2781	16.3343	7.67
		7.6822	11.185	7.7896	11.3273	15.0908	7.2199
		6.8351	10.9571	6.8611	10.0158	14.7517	5.8116
		6.6507	10.8499	6.6107	9.7037	14.5659	5.1172
		6.396	10.5331	6.6407	9.7172	13.4978	5.3495
		7.0893	10.6625	6.4484	9.8012	13.824	5.2461
		6.6059	11.0483	6.6776	9.9046	14.2308	5.3765
		6.8111	11.336	6.8693	9.9458	13.783	5.6907
		6.4612	10.8352	6.8646	9.7138	14.3852	5.2606
		6.7344	10.9989	6.8969	10.0756	14.975	4.9261
		6.2244	10.7841	6.8489	10.1166	14.8219	5.2064
		7.1116	11.2125	7.3421	10.6719	15.0472	5.5922
		6.5543	10.9901	6.7802	9.7132	13.9868	4.8676
		6.5209	11.1109	7.1668	9.5284	13.4416	5.0333
		6.8794	11.0105	7.156	10.2601	14.8954	5.1413
		6.7844	11.0373	6.8974	9.9615	14.5274	5.0113
		6.5132	10.7729	6.9101	10.3085	14.1366	5.7818
		6.3502	10.7615	6.8802	9.6202	13.3128	5.5399
		7.0161	11.1622	6.5882	9.8674	14.1526	5.52
		6.5279	10.9515	7.2811	10.5705	14.1693	5.4056
		6.9309	11.0492	6.8844	10.1789	13.9134	5.6455
		7.384	11.1684	7.1221	10.1176	14.7055	5.0408
		7.0876	11.0165	7.0852	10.468	15.1391	5.6887
		6.8951	10.935	6.8543	10.4582	14.4374	5.9186
		6.9558	10.6778	6.6945	9.9818	14.1977	5.2806
		6.901	11.0546	6.8773	9.9918	14.353	5.033
		6.7375	10.8167	7.393	10.3661	15.2918	5.3008
		6.7988	10.8202	6.8565	10.034	13.9647	4.9452
		6.735	10.774	7.0923	9.9778	14.6343	5.4735
		6.6734	11.2337	7.3524	9.9896	14.5812	5.3594
		7.0761	11.2386	7.3377	10.1674	14.444	5.8075
		6.6926	11.0934	6.7098	9.5668	14.0587	5.3197
		6.439	10.8941	6.9606	10.0179	14.11	5.3405
		6.7815	11.0864	7.0433	9.8236	14.6897	4.8211
		6.6543	11.2289	7.3117	9.961	14.7025	5.076
		7.752	12.0092	8.319	11.0422	15.9069	5.6121
		6.2168	11.0011	7.0344	9.6271	13.9701	4.9044
		6.465	10.9961	6.8843	9.3268	14.1326	5.0911
		6.2578	10.6973	6.8954	9.9699	14.1382	5.0191
		6.5984	11.1338	7.1398	10.1978	14.434	5.4143
		6.8268	11.1495	6.9141	9.9088	13.7305	5.5082
		6.5292	11.543	6.8363	9.4124	13.3082	5.1129
		7.0013	11.6094	7.2669	10.0842	13.7659	5.6456
		6.8974	11.2944	7.1784	10.2971	14.1479	5.8112
		6.5681	10.9	7.0631	9.5413	13.9313	5.18
		5.8909	10.6974	6.7127	9.4381	13.9028	5.0802
		6.6514	11.0225	7.2554	10.695	14.5164	5.5954
		6.2195	10.8373	7.0115	9.499	13.7963	4.953
		6.6115	11.1022	6.7471	9.7526	13.9419	5.1005
		6.5904	10.7115	6.7463	9.8575	14.183	5.4086
		6.6148	10.9863	6.9182	10.3835	14.0677	5.6287
		6.5952	10.9389	6.7617	9.4631	13.7883	5.0011
		6.6009	10.9602	6.7714	9.6149	14.3873	5.0902
		6.6341	11.121	7.0197	10.0174	12.3968	6.5043
		6.1891	10.7205	6.7297	10.4396	13.122	7.0103
		6.9218	11.025	6.8574	9.6899	13.0285	5.1139
		6.2177	10.5612	6.5842	9.2633	12.7945	5.0436
		6.2431	10.8106	6.6926	9.6975	13.8672	5.4656
		6.619	10.9273	6.886	9.3143	12.6289	5.0799
		6.1915	10.7218	6.7936	9.6316	13.2899	5.6257
		6.1182	11.0579	6.9796	10.0627	13.4357	5.5854
		6.0657	10.8549	6.722	9.8521	13.8076	5.8851
		6.1365	10.76	6.8592	10.0271	13.6226	5.6126
		6.9905	10.7742	7.0225	10.2363	14.4586	5.335
		7.1671	11.2923	7.0954	10.1126	14.6638	5.8355
		6.8371	11.6601	7.5916	10.2848	15.0303	5.157
		6.9202	11.3067	7.5286	10.4176	14.4974	5.6783
		6.437	11.0062	7.3247	10.0304	15.1539	5.0436
		6.4647	10.8528	6.8173	9.8811	14.1672	4.9333
		6.435	11.0349	7.3288	10.2014	14.7251	5.1683
		6.6414	10.6098	6.9903	9.8352	14.7641	5.2199
		6.4374	10.8963	7.0981	10.65	14.7718	5.9734
		6.5243	11.3726	7.5307	10.669	14.8979	5.8481
		6.1907	10.6588	7.2038	10.8616	14.6895	6.8805
		7.2003	11.8543	8.4399	11.643	15.6599	7.3109
		7.0625	11.4971	7.6254	10.8709	15.8521	6.606
		7.1036	11.3925	7.4252	11.1044	15.0323	6.7556
		7.7782	11.8845	8.192	11.5222	15.9881	7.2388
		7.2448	10.856	7.5812	11.2123	15.0899	7.1607
		7.1484	10.9437	7.3753	11.5161	15.9306	7.8796
		7.9631	11.8151	8.3808	12.0717	16.0763	7.1782
		7.883	11.6866	8.6717	12.1503	17.1477	6.756
		7.5582	11.6351	8.4505	11.8668	16.502	6.6828
		7.9612	11.9799	8.9347	12.1005	16.7969	6.9723
		7.6655	12.0995	9.0799	11.8185	16.6018	6.6125
		8.3798	12.1614	9.2184	12.5847	16.917	7.3019
		8.6429	13.3265	10.4973	12.6977	17.0372	6.8971
		9.4631	13.5914	10.8755	13.1364	17.4115	7.9952
		9.266	13.741	10.3773	12.9638	17.16	7.9585
		8.9969	13.1197	10.0337	13.1677	17.3402	7.7753
		10.5471	14.7807	11.175	12.9843	18.0342	7.1131
		10.1548	14.4039	11.0615	13.9553	17.8198	8.6871
		9.7951	13.4182	10.7756	14.7652	17.6902	10.676
		9.3327	13.3921	10.1222	13.3709	16.4256	10.2854
		10.9791	14.4454	12.3182	16.1145	19.4559	11.9755
		10.3248	13.0331	10.7786	15.444	18.5461	12.6673
		8.4606	13.0674	10.5246	13.2724	16.1537	10.2552
		9.4742	13.3041	10.799	13.1904	17.2134	9.8256
		8.9983	13.2804	10.4151	13.2222	16.8201	11.0587
		9.7125	13.2188	10.8025	14.9007	17.8609	14.3391
		8.9333	12.6821	10.0233	14.136	16.9913	14.6923
		9.3749	13.1402	10.4696	13.4557	18.1805	13.5006
		10.5361	14.8815	12.2673	14.3725	18.0417	12.5917
		9.915	14.0789	11.5066	14.0496	18.1233	11.4743
		10.0721	13.5632	10.5516	14.5111	18.9278	13.257
		9.917	13.9333	10.9471	13.8551	18.6684	12.1947
		9.9206	13.9544	10.4825	13.0208	17.9946	12.4069
		9.8448	13.5071	10.3365	13.6478	18.2048	12.3862
		10.3517	13.7818	11.1421	14.1153	19.1611	12.7755
		9.1943	13.039	10.3537	13.6017	18.474	11.8361
		10.0709	13.7248	10.3844	13.8549	18.5518	11.2031
		9.4992	12.5971	10.3567	13.8576	18.9163	12.8804
		9.9211	12.1715	10.3667	13.8881	19.0476	13.6319
		9.3426	11.7498	9.5354	12.865	17.8261	12.3472
		8.4596	11.3067	8.3044	12.807	17.4269	14.4329
		8.0832	11.4859	8.674	12.4377	17.326	13.5909
		7.9827	11.8379	8.8934	12.1727	17.2056	13.8822
		7.8892	11.8004	8.6307	11.2107	16.2993	13.4556
		7.9482	11.6857	8.3058	11.3676	16.3361	13.48
		7.7318	11.81	8.0204	10.0518	14.8312	12.7336
		6.5261	10.6791	7.4266	9.5385	13.9166	12.9273
		6.657	11.3568	7.5725	9.5109	14.5076	13.1847
		7.285	11.0276	7.8067	11.3728	16.4088	13.8965
		6.9317	11.3713	8.0623	10.3914	15.5373	12.2703
		7.1346	11.1642	7.4878	10.6293	15.5808	12.9859
		7.3879	11.4156	8.0222	10.54	15.3564	12.3426
		6.9741	11.202	8.059	10.5009	15.6664	11.5431
		7.3783	11.8226	8.5648	10.5205	16.0975	11.62
		7.9704	12.2689	8.5667	11.1377	16.3363	10.7619
		7.4675	12.1413	8.3745	10.1935	15.7102	11.1317
		7.1762	11.922	8.4145	10.3445	15.5324	10.9546
		7.424	11.6933	8.5729	10.6689	15.9193	12.0763
		6.9449	11.4384	8.3164	11.4475	16.7388	12.3042
		7.2678	11.4012	8.1933	11.1341	16.672	9.9585
		6.3963	10.816	7.706	9.6226	14.9763	8.8523
		6.384	10.9054	7.6415	10.5697	15.954	9.5696
		6.6839	11.5357	7.9947	10.6726	16.0573	10.6587
		7.6209	11.1539	8.4737	11.6752	16.9858	12.0508
		7.4283	10.7857	8.5707	11.9976	17.1977	12.0786
		7.4012	11.2548	8.6491	12.5021	17.653	11.212
		7.8121	11.2968	8.5518	12.5516	17.2471	11.5398
		7.0555	11.3395	8.5042	11.9387	16.7166	8.3666
		6.6093	11.1811	8.1095	11.6752	15.8668	8.1205
		6.5352	10.9902	7.703	11.2904	15.9597	7.7224
		7.3335	11.4027	8.3602	12.2843	16.621	8.2566
		7.0191	11.3779	8.5976	12.5552	15.8102	9.0431
		7.341	11.3538	8.4002	12.2932	16.302	9.0316
		8.1044	12.4923	9.3515	12.6439	16.424	9.2001
		8.3826	13.2001	9.7051	12.2687	15.5566	8.3753
		8.245	13.0078	10.1187	12.7872	16.5594	8.6312
		6.8322	12.0875	8.8208	12.1761	16.0208	8.7378
		7.383	11.968	8.935	12.4993	16.6747	9.1617
		6.5586	11.15	8.8626	12.673	17.2984	9.2539
		6.5128	12.1904	8.3575	11.207	14.9885	7.8
		8.1402	12.4311	9.102	13.4515	17.3686	10.17
		7.6509	12.9205	9.2846	12.4082	16.2554	8.6174
		8.3174	12.2466	9.5498	12.8587	17.6959	9.4065
		8.1672	12.5553	9.449	12.7454	17.584	7.9948
		7.777	12.1704	8.7254	12.2972	16.8563	8.7101
		7.4586	12.078	8.7656	11.9909	16.7404	7.8543
		6.8881	11.8548	8.5213	11.5933	16.2066	7.3778
		7.393	11.6244	8.9669	12.3596	17.3029	8.9602
		7.1403	11.3198	8.3887	11.6951	16.1627	8.2995
		6.5664	11.2367	8.0512	11.4979	16.1847	7.2642
		6.9497	11.3626	8.0432	12.3137	15.8917	9.773
		7.1475	12.0152	8.7302	11.5667	14.2523	7.5109
		6.5155	11.5441	8.2811	11.5084	15.5896	7.5386
		6.9858	11.8205	8.7341	11.8434	14.8334	7.4036
		7.288	11.4106	8.6338	12.4747	16.3416	8.5178
		7.2724	11.4893	8.5964	12.1746	16.5328	7.8013
		6.8511	11.1905	8.4585	11.5729	16.3555	7.6103
		7.0738	11.6439	8.7463	11.6787	16.932	7.6519
		7.1173	11.2001	8.9596	12.4637	17.8871	8.0761
		6.7292	11.3581	8.8119	11.7707	16.5862	7.8207
		6.9112	11.2323	8.3453	11.3885	16.641	8.1675
		7.2009	11.9972	9.2115	11.5057	16.8438	7.8167
		7.4637	11.4453	8.3911	12.0277	16.9846	8.4265
		7.1502	11.2896	8.3691	12.1925	16.2296	8.489
		6.9743	11.0744	8.2748	11.7141	16.5162	7.8877
		6.6042	11.449	8.7385	11.5837	15.8758	7.8383
		7.8121	11.9919	9.1044	12.3852	17.2979	7.9939
		8.311	12.2388	9.176	12.6256	17.0488	8.9529
		7.5487	11.2213	8.4688	12.2782	16.5051	8.983
		7.7617	11.9828	9.4017	12.6698	17.407	9.0687
		7.7442	11.2532	8.4158	12.1377	17.311	8.6994
		7.7233	11.4604	8.3503	11.3387	16.1596	8.0302
		8.5563	11.9993	9.4243	13.0988	17.6492	8.6629
		7.6901	11.8939	8.5444	12.1515	16.2867	7.7518
		7.4637	11.397	8.6872	12.1105	16.3241	7.581
		7.599	11.4086	8.9795	12.3618	16.8023	8.0798
		7.8309	11.8475	9.3408	13.1448	15.4304	8.9191
		6.3976	10.7591	8.3218	11.8203	14.4693	8.6739
		6.3996	10.9877	8.5189	11.7974	14.9671	8.1147
		6.9022	11.0451	8.462	11.9737	15.2648	8.852
		6.6891	11.423	8.8715	11.483	16.1968	7.6509
		6.6033	11.3174	8.4417	11.8101	16.1159	8.4418
		7.0532	11.3557	8.4524	11.7547	16.7724	8.5714
		8.1336	12.1678	9.0916	12.567	17.3905	8.5797
		6.7906	11.5234	8.3641	11.2084	15.536	8.1679
		7.0257	11.8299	8.4642	11.788	16.8289	9.211
		8.1511	12.1121	9.2962	12.6252	17.6383	8.8603
		8.5515	12.805	9.4974	12.2431	17.2692	8.1027
		7.9499	12.5782	9.4215	12.2818	17.1971	8.5523
		7.7639	11.9033	8.7476	11.6233	16.6877	9.9405
		7.0892	11.5042	8.308	11.7252	16.5357	8.2292
		7.307	11.4565	8.6136	11.7192	16.5321	8.794
		8.3492	11.9215	9.4105	13.0724	18.3684	9.8904
		7.5527	11.6601	8.8686	12.2278	17.2497	8.9425
		7.8505	12.1097	9.0346	11.9063	17.0481	7.9953
		7.5118	11.8339	8.7124	11.8695	16.8717	8.1471
		7.6239	11.6979	8.7259	11.9285	17.1342	8.7344
		6.6996	11.6312	8.4971	11.2659	16.5706	9.7574
		7.1462	11.3281	8.8244	12.3622	17.4077	9.8585
		7.9811	12.4213	9.3914	11.9239	17.2111	9.9467
		7.0744	11.3167	8.3994	11.4209	16.894	9.1663
		6.944	11.3496	8.0783	11.1801	16.3142	7.9246
		7.4592	11.5753	8.5123	11.3661	16.3968	9.1526
		7.3926	11.4461	8.2157	11.5849	16.7823	9.9201
		7.274	11.7701	8.6832	11.6273	16.7466	9.5494
		7.1041	11.6036	8.332	10.7724	16.0966	10.9652
		6.7959	11.4908	8.0942	11.23	16.1484	10.5968
		7.0194	11.342	8.2698	11.1823	16.3589	10.1024
		6.892	11.3205	8.4816	11.6051	16.485	10.5167
		7.0875	11.1943	8.1946	11.4318	16.7978	11.2433
		7.283	11.4266	8.3953	11.2471	16.3343	13.1695
		7.2384	12.0259	8.5425	10.7181	16.1241	12.4934
		7.2541	11.8368	8.369	10.7167	15.7376	12.3183
		7.7412	11.6665	8.5897	11.3411	16.6138	11.4152
		7.1377	11.3985	8.2001	10.9702	16.0532	10.9824
		6.5164	10.612	8.2844	11.3426	16.6001	11.4889
		6.9124	11.0233	8.115	11.0198	16.4525	10.2302
		6.6465	11.4552	8.5594	10.8913	16.2142	10.8573
		6.6195	11.4468	8.3084	10.974	16.1501	9.7005
		6.8096	11.4543	8.2622	10.9507	16.2481	10.7878
		6.8999	11.7159	8.3886	11.2244	16.3365	10.6959
		7.4418	11.8088	8.625	11.3929	16.7106	10.2684
		6.4655	11.4982	8.2859	10.5721	15.709	9.0602
		7.4882	11.6946	8.9057	11.4637	16.7918	10.252
		7.3385	11.7719	9.2122	11.895	16.7786	10.2419
		7.0507	11.8359	8.6569	11.2852	16.1665	8.2916
		6.9964	11.2159	8.168	11.7148	16.734	10.4722
		8.0458	12.1644	9.3476	12.3487	17.3415	10.7047
		6.8569	11.7751	8.4215	10.2882	15.4511	9.2809
		7.4956	11.828	8.4906	10.7244	16.0033	10.037
		7.2333	11.8212	8.1618	10.8783	16.345	11.2472
		6.4486	11.1909	7.7866	10.0494	15.3601	10.1153
		6.2877	10.9854	7.9536	10.5858	16.0522	9.3968
		6.9643	11.4149	8.1047	10.7739	16.3434	9.7481
		6.5337	11.6564	8.5081	10.4727	15.9001	9.3511
		6.895	11.7219	8.5388	11.4985	16.3502	10.9204
		7.1539	11.8188	8.0866	10.7524	16.2501	11.1733
		7.1416	11.4777	8.3692	11.4329	16.5221	11.9165
		7.5348	11.6857	8.5868	11.4114	16.3503	11.2084
		7.2309	11.6072	8.4466	11.119	16.5614	11.9476
		6.2384	11.0026	8.2907	10.802	16.0252	11.6972
		7.0131	11.6521	8.781	11.4326	16.7758	12.4177
		6.9732	11.39	8.4759	11.1646	16.4195	12.0163
		7.3823	11.6629	8.5508	11.4344	16.4782	13.4786
		7.0823	11.2007	8.2447	11.4423	16.727	11.9041
		7.4847	11.6471	8.445	11.6679	16.4808	11.0695
		8.8452	12.1148	9.9722	13.4244	18.4791	11.7923
		7.4073	11.8206	9.187	11.7225	16.9907	10.7761
		6.5655	11.843	8.4866	10.4882	15.9536	10.2525
		6.9812	12.2089	8.7861	10.8459	15.9056	9.777
		7.7377	12.1329	9.3214	11.7365	16.9421	10.7166
		7.0094	11.7489	8.7187	10.951	16.12	9.9285
		8.0953	12.7921	9.3515	11.6009	17.2098	9.901
		7.0533	12.2672	8.9692	10.0115	15.6387	8.673
		7.8731	12.7419	10.1977	11.3212	16.9324	10.2585
		8.9872	14.0655	10.7343	12.2247	17.7077	10.5003
		7.5944	12.6066	9.6468	12.0229	17.3946	9.2339
		8.8113	13.5256	10.5364	12.5125	18.0425	9.8952
		7.8449	12.3509	9.6505	12.1681	17.3605	10.9788
		7.978	12.0811	9.5677	12.5771	17.0368	10.7021
		8.8406	13.1313	10.807	13.3474	18.5908	10.5485
		8.2097	12.5386	9.4507	12.3242	17.3786	11.5616
		9.5871	13.8101	11.1118	14.0122	19.3565	12.8919
		8.8544	12.4459	10.3337	14.1739	18.6035	13.0241
		8.4712	12.8048	9.9451	13.5917	18.0641	13.158
		8.7838	12.7165	10.1814	13.9595	18.2685	13.7451
		8.8163	12.4449	9.813	14.2974	17.562	14.5072
		8.2047	12.6158	9.5634	13.0102	16.1476	13.0195
		8.442	11.8858	8.9801	13.7558	16.6625	14.8151
		7.8159	11.0913	8.8305	13.9449	16.7702	14.8679
		8.1736	11.8632	9.4592	13.9282	17.0628	14.4586
		7.8678	11.4004	8.938	13.2853	17.0429	13.4627
		8.1025	12.0317	8.7403	12.9738	16.0865	14.0436
		7.2024	11.6518	8.4914	12.8947	15.7234	12.112
		6.8665	11.4191	8.2449	12.6371	15.3506	12.638
		6.6416	11.6059	8.879	12.3249	16.1986	11.1563
		6.6204	11.7716	9.0694	12.4351	16.2802	11.3433
		7.2713	11.3325	8.3169	12.3439	15.9624	11.0466
		7.2181	11.6876	8.972	12.1585	16.7406	11.7426
		8.0668	11.7489	8.9987	12.9707	17.4401	13.0502
		8.044	11.9007	9.0868	13.4781	16.5686	13.4258
		9.2531	12.5972	10.2187	14.2806	18.118	14.8746
		9.313	12.9237	10.9375	15.1168	18.4709	13.4108
		9.8423	12.9343	10.5975	14.7008	19.2781	14.9603
		10.1537	12.4177	11.0274	15.7242	20.1859	15.3937
		9.0307	12.5665	9.9948	14.2829	17.5865	13.2235
		9.1559	12.7222	11.01	15.0993	17.7262	12.6187
		8.6476	12.0561	9.9212	14.6259	17.4336	13.2469
		8.4117	11.2915	9.1793	14.2676	17.0872	14.3361
		8.6569	12.3001	10.3879	14.1177	18.0421	12.9941
		7.9436	11.9743	9.9409	13.9591	17.1333	13.2388
		9.407	13.3106	11.7906	15.0983	18.3297	12.9581
		9.3331	12.3545	11.041	15.1756	19.0246	13.864
		9.333	12.1798	10.264	14.8799	18.2649	13.6294
		10.133	13.0153	11.4212	16.0369	18.7344	15.8019
		10.8897	13.162	10.951	16.2582	18.9578	17.8285
		9.15	11.8431	9.3392	14.4218	16.6367	16.4526
		8.9779	12.7512	8.8755	12.9548	15.9558	14.9493
		8.3937	12.159	8.9937	12.4984	16.018	14.4267
		8.831	12.0382	8.5832	12.377	15.9447	14.9913
		9.1746	12.7619	10.4168	13.7119	16.8443	14.6172
		8.1398	11.5535	9.3984	13.1535	15.7299	15.2878
		8.8873	12.135	9.8404	13.4646	15.5753	15.9995
		9.1043	11.8262	9.1704	13.6469	15.8801	16.0908
		8.3497	11.8241	9.41	13.3137	17.0226	14.8857
		8.1908	12.3384	8.6188	12.6522	15.3103	14.6045
		9.4056	12.5903	10.6683	14.7701	17.7259	16.7371
		9.8391	13.3828	11.2825	15.3394	16.5741	15.6391
		9.2572	12.5929	9.9847	14.0434	15.2643	14.5305
		9.8493	12.8128	10.7112	14.6764	15.9985	16.2935
		10.3361	13.1741	10.667	15.4802	17.533	16.2763
		9.944	13.1236	10.3589	14.2682	16.2605	16.7836
		9.0864	12.8882	9.7177	12.7939	15.8221	15.0754
		8.6645	12.1427	9.0995	13.4035	15.5419	16.4868
		8.5462	12.2743	9.1495	12.8964	15.4056	16.0641
		8.6037	12.1509	9.0113	13.2156	15.8341	16.6261
		9.8914	13.2832	10.5162	13.9828	15.9468	16.7852
		9.8008	13.1744	10.6749	14.3666	16.9058	16.9115
		10.4514	13.6248	11.058	13.8475	16.3142	15.9889
		11.9521	15.8581	13.1132	16.3046	17.8347	15.6635
		12.0495	15.6163	13.1182	16.5282	18.7009	16.1939
		10.3635	13.4423	11.3784	15.5094	17.8636	12.381
		8.6241	12.6494	10.059	13.7713	15.8548	10.8325
		10.7602	14.4211	11.3653	15.2893	18.7981	11.4183
		11.054	14.5856	12.5746	15.9646	18.9705	12.2056
		10.391	14.6064	11.7964	14.1798	18.7787	9.6917
		9.437	13.7514	10.9523	13.0628	17.6278	7.8842
		9.2325	13.516	10.7908	12.9766	18.3478	6.9244
		9.6982	13.8543	11.4231	13.1808	18.6791	7.1279
		9.8412	13.2505	11.0296	14.8754	19.5691	9.7782
		8.6812	12.4035	10.0751	12.9616	18.0895	8.44
		9.0255	12.6792	10.1328	12.6218	17.6711	6.9394
		8.9774	13.3848	10.6961	13.3258	18.0605	8.1885
		8.1623	11.9219	10.0209	13.2148	17.7136	8.5573
		8.5691	12.3684	10.163	12.9964	16.3566	8.4363
		8.4575	12.3068	10.4835	13.7533	17.7209	9.4837
		7.2351	12.2097	9.362	11.8012	15.9522	7.0237
		7.7849	11.9354	9.3618	12.9182	16.8301	8.1659
		8.5465	12.7187	9.3111	12.7889	17.2393	8.0016
		8.3117	12.1107	9.1018	12.7109	16.8488	8.1196
		7.6684	11.9882	9.0526	12.3497	16.8254	7.1636
		8.5362	12.6835	9.2932	12.0378	16.3447	7.5561
		8.9237	12.3822	10.3601	14.657	18.975	10.7808
		8.33	11.8298	9.0967	13.9466	17.804	10.5162
		8.5117	12.0862	9.0832	13.3588	17.1849	9.5182
		8.5456	13.0296	10.0897	13.5844	17.4272	9.3622
		7.307	11.2796	8.7539	12.559	16.0105	9.1812
		6.9273	11.5144	8.931	12.7048	14.6265	9.6441
		7.8739	12.3535	9.1155	12.8203	15.4505	9.537
		7.4944	12.1966	8.5796	11.526	14.6012	7.9228
		8.372	12.3369	8.6148	12.778	16.7977	9.3692
		9.3583	12.8131	10.3772	14.3895	18.1298	10.2092
		7.5384	11.5558	9.1469	13.1477	16.7526	9.8978
		7.9598	11.2897	8.4978	13.0083	17.0393	9.7047
		7.8292	11.2885	8.5343	12.574	16.5552	9.2426
		7.8597	12.0194	8.6668	12.5976	16.5284	8.4701
		7.8184	12.1587	9.1824	12.4276	16.4018	8.0645
		8.5256	12.0633	9.4787	13.78	18.4088	9.7218
		8.0355	11.9811	9.5006	13.5698	17.4413	9.8186
		8.708	12.4121	9.8215	13.8381	18.2739	9.4038
		8.6059	12.0193	9.0538	13.7695	17.212	10.626
		7.8478	11.875	8.6036	12.6362	16.4909	8.4001
		9.1465	12.9842	10.125	14.1256	17.2894	10.0654
		8.7397	12.1243	9.9742	14.321	18.2141	10.2692
		8.9356	11.548	9.7306	15.1479	18.0344	12.0356
		8.7062	11.9014	9.9361	14.6913	17.692	11.8312
		8.8649	11.9248	10.3491	14.9744	18.2697	11.5254
		9.0972	11.8954	10.1552	14.808	19.2128	11.0393
		9.0488	12.7219	10.5717	14.3291	18.0741	10.3587
		8.4889	12.3936	9.8293	13.4306	17.2919	8.7196
		9.5466	12.4067	10.0064	14.3537	18.3295	10.0536
		9.5339	12.5957	10.4873	14.6543	18.8662	10.2364
		7.5643	11.3767	9.2186	13.4016	17.6452	9.1794
		7.1403	11.257	8.5143	12.6759	16.8227	8.5634
		7.1122	10.5355	8.1142	12.424	16.0959	9.4375
		7.2553	11.5454	8.8391	12.7477	16.0547	10.0055
		6.8221	10.7666	8.1271	12.5721	15.2408	9.0634
		7.2658	10.93	8.46	12.7337	15.9116	9.8092
		6.1878	10.8316	8.0218	11.8858	14.6944	9.2596
		7.5618	11.2646	8.9534	13.7286	15.9657	10.7378
		7.5442	11.2825	8.497	12.9387	15.8211	10.0286
		6.4962	10.8922	8.1888	12.3993	14.5906	9.5067
		7.6407	10.9991	8.6674	13.4597	16.2169	10.566
		7.0409	10.7278	8.3856	13.1017	16.0035	10.1316
		6.7784	10.6058	7.8453	12.0819	14.9714	9.0502
		6.8703	11.472	8.3729	12.0981	14.6882	9.1151
		6.1988	10.8332	8.0255	11.5018	14.4023	8.1458
		6.8271	11.3146	8.353	11.9983	14.9656	9.3739
		7.071	11.0954	8.0249	12.4429	15.1637	9.4081
		6.46	10.9694	8.4604	12.5663	14.8399	9.8717
		7.6293	11.7142	8.8848	13.0183	15.4109	10.0272
		6.4798	10.9194	8.8325	12.9891	14.7387	10.074
		6.4856	10.7412	8.4346	12.6276	15.3756	9.4077
		7.1627	10.7516	8.1779	12.9776	16.0544	9.8827
		7.7923	11.1362	8.2729	13.2552	16.7877	9.902
		7.3653	11.016	8.2441	12.7005	16.5112	9.485
		6.8517	10.4641	7.9126	12.7055	16.8116	9.6565
		6.8954	10.1231	7.6794	12.6492	15.5823	10.0586
		7.4835	10.5656	8.0545	12.442	16.273	10.3478
		7.6366	11.2998	8.6242	12.8692	16.3649	9.6265
		7.647	11.4921	8.5455	12.6711	16.1188	8.8648
		8.4395	11.7815	8.9327	13.3318	16.1349	10.0143
		7.7364	11.4012	8.446	12.7608	15.1681	9.3565
		7.776	11.1577	8.6154	12.7291	15.9535	8.5165
		8.2121	11.1606	8.7587	12.9339	16.3558	8.666
		8.6306	12.0381	8.5586	12.3075	15.2431	9.0633
		7.2553	10.8726	7.4801	11.6512	14.5153	8.9474
		8.4615	11.889	8.6447	12.58	15.0189	10.0683
		8.7301	12.3151	8.7191	12.3288	15.0942	9.1856
		9.1489	12.2013	8.5176	11.8636	14.9369	8.7298
		9.2355	12.0319	8.4413	12.4745	15.5038	9.8439
		9.1186	11.7608	8.9259	12.8743	17.4078	9.1577
		8.0096	11.3825	7.9395	11.9802	16.4171	7.4417
		7.9284	11.348	8.2688	12.4056	16.8053	7.8821
		8.6056	11.8169	8.8035	12.4639	16.4488	8.0845
		7.6931	11.4052	7.5533	11.4002	15.8022	8.2161
		6.7811	11.0815	7.5444	10.9446	15.1071	7.3975
		6.7226	10.9828	6.9034	9.2885	13.1639	5.5445
		7.1031	10.5517	5.8884	9.2093	13.5285	6.3587
		7.09	10.7804	6.1401	9.4654	13.202	7.79
		7.0114	10.2098	5.8521	10.1433	14.0036	7.3416
		8.1063	9.9986	6.4895	10.4256	14.6362	7.2006
		6.7327	9.8762	5.8263	9.4353	12.5239	6.9586
		6.9367	10.274	6.0904	9.5957	12.9973	7.8787
		6.1581	10.1932	5.8835	9.4166	12.5324	6.9306
		6.2461	9.7167	5.8792	9.5762	11.746	6.882
		7.0659	10.602	6.14	8.9429	11.5801	6.9816
		6.4076	10.3467	5.7526	8.9585	12.3597	6.8442
		6.8949	10.2408	5.626	9.5687	11.8046	7.748
		6.8426	10.798	6.322	9.8666	12.5691	7.8662
		5.8964	10.1354	5.447	9.059	12.0384	7.0419
		6.3748	10.5669	6.2473	9.4353	12.0224	7.3371
		6.7711	10.3659	6.0766	9.8068	12.3016	7.6278
		6.6965	10.6681	6.2936	9.6944	13.3148	6.8304
		6.4107	10.3687	5.9762	9.59	12.9235	7.2097
		6.9869	10.3279	6.0801	9.8019	13.4047	7.17
		6.7963	10.2583	6.1103	9.9143	13.416	7.2787
		6.4201	10.4205	6.2432	9.7651	13.841	7.0436
		6.2284	9.197	5.5023	9.8573	12.6016	7.5363
		7.1021	9.6246	5.7149	9.4987	13.2895	8.7661
		6.9456	9.728	5.5197	9.5176	12.6369	9.7105
		6.3037	9.6614	6.0253	9.4315	12.3224	10.0222
		6.3518	9.5449	5.9884	10.0419	12.836	9.3056
		6.4932	9.18	5.5312	9.4756	11.2153	9.8358
		5.8203	9.5063	5.6308	8.951	11.0214	10.2426
		5.4313	9.7682	5.4715	9.0155	10.4078	9.0387
		4.9975	9.2828	5.2362	9.1871	10.3698	8.6196
		6.1752	9.4325	5.9078	10.1519	12.9425	9.3421
		6.3961	9.6002	5.5537	9.0587	12.3315	9.775
		6.0568	9.386	5.7902	9.3552	13.5197	10.178
		6.4978	9.3444	5.6819	10.2152	13.3288	12.0189
		6.4379	9.2438	4.8619	8.719	12.3628	10.7911
		5.393	9.1606	4.1384	8.4036	11.6277	8.9338
		4.9841	8.8798	4.2063	8.1753	12.0447	9.1022
		5.1011	9.1675	4.8467	7.3408	11.3742	9.6323
		5.2902	9.0243	4.8636	7.4846	11.7559	9.0787
		4.843	9.12	4.841	7.1338	11.6947	7.0754
		4.5682	9.2198	4.8347	7.485	11.7005	7.6314
		4.953	9.0702	5.4892	9.0178	13.6833	7.9649
		5.118	9.5151	5.5403	9.1064	13.5121	7.9507
		4.7172	9.0906	4.878	8.3134	12.8076	7.9447
		4.8365	9.3489	4.6113	7.9125	11.9475	6.7211
		4.7719	9.4102	4.6348	7.8395	12.0147	7.3471
		4.8017	9.3431	5.2298	8.0396	12.407	6.3573
		5.0459	9.4934	5.2437	8.4287	13.0838	7.4271
		4.7317	9.1705	4.9589	7.8088	12.1918	6.7095
		5.5523	9.1878	5.3548	8.4367	12.6248	9.0419
		6.2354	9.2084	4.5327	8.0995	12.0518	9.8713
		5.2025	8.5374	4.7658	7.3891	11.7913	9.7492
		4.8209	8.9853	4.6556	6.2233	11.073	8.8497
		4.7521	8.9721	4.8087	6.5683	11.254	7.0036
		4.7055	9.3497	4.7852	6.5216	11.2459	5.459
		4.6944	9.1578	4.5519	5.9221	10.9699	6.2607
		4.7706	8.8228	4.5854	6.324	11.2977	7.3034
		4.693	8.8096	4.2801	5.7476	10.7333	7.0739
		4.3608	8.3101	4.2234	6.2006	11.2521	6.9532
		4.4213	8.5883	4.1262	5.5982	10.6607	7.162
		4.6011	8.9693	4.7563	5.9278	10.7636	7.6263
		4.139	9.0278	4.8315	6.4424	11.5792	6.8926
		3.9854	8.9006	4.39	5.8187	10.6255	7.5486
		4.2351	8.4166	4.0267	5.3018	10.375	7.1141
		4.2118	8.7124	4.6731	6.0343	11.341	6.5004
		4.6164	8.7964	4.1597	5.743	10.4714	6.8834
		4.6984	8.9193	4.5182	5.7433	10.9393	5.7832
		4.7543	9.006	4.7292	5.8318	11.1515	6.0597
		4.8169	8.7556	4.3542	5.8971	11.3709	5.9859
		4.7896	8.9465	4.4767	5.7265	10.8878	5.8635
		4.8093	8.8522	4.5249	6.2722	11.336	5.2861
		4.1727	8.413	4.6029	6.1437	10.8419	5.8891
		4.1889	8.632	4.5368	5.816	10.815	5.1997
		4.5921	8.4893	4.2363	5.7671	10.7139	5.2057
		4.5059	8.801	4.4598	6.7436	11.5683	6.225
		4.3063	9.0888	4.38	6.4291	11.1085	5.9571
		4.2109	9.0258	4.7376	6.4506	10.9176	5.4742
		4.295	9.2942	4.7232	6.6531	10.7749	6.2967
		4.4184	9.2132	4.6137	6.6229	11.3862	6.2094
		4.1311	9.1939	4.6946	6.5542	11.5224	7.572
		4.1346	9.453	4.652	5.2827	10.7019	6.8511
		4.2171	8.9505	4.5525	6.0594	11.058	6.6503
		4.9395	9.7666	4.9518	6.6812	11.5822	6.0987
		4.7066	9.2204	4.5135	6.7775	11.1929	6.7917
		5.0059	9.092	4.9403	7.3577	11.88	6.3218
		4.9114	9.2987	4.5791	6.9295	11.5555	7.0216
		4.2459	9.4663	4.6694	6.5764	11.5988	6.3282
		4.5641	9.6937	5.1366	6.903	11.9117	6.438
		4.1683	9.3588	4.6717	6.4564	11.0993	6.0167
		4.3708	9.3933	4.4375	6.5207	11.8321	6.1901
		3.9907	9.4274	4.7541	6.5091	11.9269	6.1932
		4.234	9.3884	4.4196	6.7335	11.1014	5.2675
		4.275	9.5075	4.6109	6.584	11.0371	5.1545
		4.1997	9.4114	4.2199	6.9537	11.4656	5.6688
		4.151	9.2003	4.3559	6.3985	11.5191	5.4331
		4.7101	9.6064	4.7111	6.4908	11.4014	5.0299
		3.8161	9.1814	4.7002	6.5718	11.6086	4.9252
		4.6158	9.4744	4.7474	6.0736	10.7274	6.7988
		4.1401	9.2878	4.4739	6.2701	11.1331	5.8396
		4.7945	9.7065	5.0058	7.0781	11.9255	6.2718
		4.3474	9.2445	4.643	6.5756	11.5351	5.9502
		4.1367	9.4122	4.5469	6.0807	10.9906	6.1234
		4.3185	9.5047	5.1981	7.1038	12.2007	6.0146
		3.8503	9.4282	4.7337	6.5787	11.2158	6.0583
		4.5684	9.4948	4.7572	6.7396	11.5186	5.5435
		3.9416	8.9722	4.5083	6.5946	10.9839	6.6426
		4.1224	9.4458	4.7898	6.3382	11.4595	6.0224
		3.9816	8.9098	4.6381	6.8672	11.4686	6.797
		4.2457	9.1333	4.5611	6.9289	11.3745	6.9747
		3.9617	9.2028	4.6621	5.7492	10.8452	6.1449
		4.556	9.5806	4.7083	7.2553	11.9413	6.1191
		4.0442	9.4345	4.8609	6.7266	11.0781	5.6798
		4.3877	9.5901	4.8981	6.9036	11.4124	5.068
		4.5754	9.8918	4.9232	6.0801	10.8968	5.3372
		4.3848	9.1192	4.4185	7.2658	11.8365	5.7543
		4.2136	9.4565	4.7043	6.7171	11.5555	6.1477
		4.0059	8.7244	4.5291	6.6357	11.4754	5.0807
		4.0266	8.8963	4.5275	6.7004	11.2352	5.0005
		4.1152	9.1936	4.6903	6.1625	11.6678	4.7905
		3.3654	9.1281	4.8621	6.0811	11.4407	5.891
		3.7733	9.5776	5.3395	5.5415	10.83	5.8428
		3.8076	9.5424	5.2558	5.51	10.1178	5.7884
		4.3575	9.3557	4.6184	6.5324	11.0186	5.703
		4.0616	9.0154	4.3204	5.702	10.8351	5.8806
		4.0325	9.152	4.3996	5.857	11.1773	5.9876
		4.3991	9.1097	4.4942	5.3587	10.9431	5.8886
		4.2866	8.5712	4.266	5.6327	10.6841	6.2538
		4.2655	9.2327	4.6975	5.6052	10.5508	5.5915
		4.5755	8.8925	4.4951	5.3013	10.2425	5.9467
		4.48	8.5154	3.9501	5.4966	9.8413	5.9352
		4.3224	8.3641	4.3516	5.8762	10.5057	5.5302
		4.5455	9.1296	4.246	5.3956	10.1557	5.8269
		4.8332	9.1315	4.1221	5.6049	10.4062	6.1019
		4.6428	9.0704	4.4948	6.161	11.2618	6.438
		5.0694	9.1216	4.7926	6.9439	11.6035	5.5045
		5.1077	8.9997	4.8444	7.4257	11.987	5.2621
		5.2496	9.3082	4.7248	6.6774	11.9866	6.0047
		5.0599	8.9204	4.3056	7.0428	11.7304	5.4794
		4.7979	9.2745	4.9487	7.3758	12.3593	6.1417
		4.8902	9.8711	5.0325	6.7413	12.1351	5.0828
		4.3083	9.2823	4.9236	7.0311	11.745	5.9289
		4.1199	9.1772	4.5463	7.0826	12.2442	5.3475
		4.5675	9.3147	4.6872	6.503	11.4098	5.0941
		5.0153	9.8161	5.2311	7.478	11.9716	5.2777
		4.4079	9.4557	4.954	6.8081	11.441	4.6802
		4.2347	9.3576	5.102	6.6449	11.6182	4.179
		4.4407	9.4695	4.5765	6.4317	11.4655	5.2245
		5.0183	9.5006	4.9411	6.481	11.498	6.1324
		5.1825	8.9941	4.7526	7.0082	12.3629	4.9346
		5.0997	9.5504	4.6837	6.2855	11.2843	6.1351
		4.4669	9.2704	4.4338	5.5639	10.7367	6.8114
		4.8638	9.1218	4.6821	7.603	11.8508	8.974
		4.3403	8.886	4.398	6.6897	11.4552	7.5584
		5.4228	9.5447	4.8396	7.2385	11.7666	6.8718
		4.881	8.9319	4.4866	7.9289	12.0557	7.1194
		5.5048	9.8094	4.7001	6.6898	11.9826	5.3556
		5.9356	9.6705	4.8657	7.3792	12.0466	5.3039
		5.6164	9.6398	4.5423	7.0242	11.4547	5.8261
		5.8193	9.6817	4.6301	6.6326	11.7281	5.579
		6.1175	9.9773	4.7362	6.852	11.4053	5.4875
		5.4393	9.6382	4.6572	6.6136	10.9335	5.5377
		6.3645	9.5962	4.6455	6.8088	11.1279	5.3151
		6.4039	10.1821	5.001	6.5114	11.2244	4.6837
		5.9592	9.9223	4.887	7.05	11.0523	4.5885
		5.9481	9.8303	4.6765	7.0763	11.55	4.7773
		6.2066	10.0374	4.8288	6.4096	10.957	5.0433
		6.2905	10.2341	5.1654	6.7571	11.2452	5.3206
		6.4171	9.932	4.9324	6.4409	11.2489	5.4157
		6.1729	9.7042	4.7275	6.5156	11.4812	4.7811
		6.9417	9.9967	4.6907	6.7583	11.8355	5.5006
		7.3175	10.4348	5.3681	6.7418	11.746	4.7557
		6.4889	9.8511	4.6656	6.9501	11.5988	5.5261
		6.7506	10.3828	5.0793	6.7266	11.3793	6.1531
		6.6688	10.2909	5.1697	6.6815	11.7665	5.2462
		6.3348	10.0873	5.2361	6.8013	11.7776	5.2146
		6.264	10.3923	4.9872	6.1287	11.0665	4.9858
		6.4253	10.1205	4.7673	6.5193	11.2314	5.9046
		5.7451	9.96	4.9107	6.7018	11.5186	5.1587
		5.5378	9.3922	4.3298	6.307	11.2324	6.6081
		5.1087	9.5979	5.0404	6.1799	11.1605	4.7721
		5.9752	9.736	4.8169	6.6602	11.4732	5.1833
		5.7823	9.7744	4.7682	6.5308	11.4589	5.5129
		5.3813	8.8748	4.2524	6.9292	11.2582	6.6268
		5.8068	9.1375	4.5294	6.9569	11.2935	6.7012
		6.0327	9.6889	4.6656	7.1047	11.2489	6.5321
		6.2577	9.618	4.6415	6.7118	10.9247	6.2445
		5.6078	9.4189	4.6269	6.5596	11.165	6.9849
		5.8933	9.4422	4.1853	6.4747	11.1001	6.3149
		5.7112	9.6631	4.7492	6.7204	12.0963	6.3287
		7.0678	10.4702	5.4073	7.0172	11.6613	7.6743
		6.7436	9.8253	4.5902	6.5264	11.7374	5.5051
		6.3525	9.7786	5.1078	6.9226	11.7028	5.2465
		5.9528	10.0427	5.0024	6.837	11.6464	5.2398
		5.893	9.3609	4.2084	6.474	11.1584	6.7842
		5.5547	9.2803	4.3284	6.6779	11.2437	6.5281
		6.2374	9.5053	4.4134	6.5335	11.1993	6.3582
		6.2743	9.3954	4.3336	6.9641	11.406	6.8206
		5.3778	9.2395	4.2085	6.5555	11.5306	6.2932
		5.3197	9.4097	4.337	6.7974	11.4124	6.6082
		5.7488	9.526	4.584	6.848	11.3648	5.4899
		6.6773	9.9938	4.7819	6.7184	11.3895	6.8178
		6.2957	9.7932	4.6865	7.1238	11.7699	6.0154
		6.424	9.7101	4.5587	6.8251	11.0675	8.5793
		6.4695	9.6756	4.3904	6.7366	11.0485	6.5895
		5.6591	9.5345	4.3722	6.79	11.3705	7.5068
		6.7534	9.6402	4.6166	6.674	11.3796	7.4587
		6.4302	10.0574	5.1868	6.1074	11.4202	6.6063
		8.3156	11.2083	6.0782	5.2393	9.9903	6.7594
		7.6155	10.5852	5.1343	5.7372	10.7194	6.7655
		7.059	10.0655	4.8904	6.7182	11.5486	6.1849
		6.3468	9.714	4.4383	6.1724	11.1577	6.7144
		6.5581	9.6818	4.6932	6.7075	12.0726	5.7863
		6.2329	9.5164	4.4841	6.7587	11.6667	6.8696
		6.6433	9.9568	4.8009	6.8357	11.8702	6.6679
		5.5947	8.9983	4.3337	7.3292	11.666	6.8406
		6.1609	9.3659	4.3175	7.0944	11.5148	6.0853
		5.8343	9.1864	4.2444	6.5362	11.6125	6.0829
		6.2945	9.8206	4.9152	6.7752	11.9206	5.4744
		6.0164	9.5497	4.9891	7.0065	12.1841	6.0261
		5.952	9.6485	4.697	6.6199	11.3214	7.1954
		5.9912	9.2904	4.5742	6.6369	11.3096	6.0598
		6.5577	9.762	4.7237	6.7883	11.5972	5.7413
		6.9634	10.0677	4.7886	6.7697	11.5989	5.4915
		5.324	9.11	4.5167	6.5682	10.8981	5.4679
		6.3439	9.7313	4.7235	6.7479	11.1185	5.6276
		5.4764	9.1657	4.1615	7.1869	11.6936	4.9232
		6.8625	9.9955	5.2548	7.3239	12.1723	4.7782
		6.2205	9.3939	4.3428	7.5875	10.8379	5.3908
		6.3396	9.5411	4.1467	7.5028	11.5494	5.5227
		6.4418	9.4137	4.433	7.6694	11.7623	5.2211
		6.3345	9.3211	4.3362	7.2425	11.7428	5.756
		5.9213	9.3192	4.1965	6.7159	11.4359	5.5718
		5.7818	9.4948	4.7279	7.1521	11.1398	5.2746
		5.5676	9.1862	4.4333	7.1827	11.5559	5.961
		5.4602	9.5289	4.498	6.3738	11.2683	5.5
		5.7055	9.5054	4.7899	7.0969	11.6097	5.4119
		6.1317	9.8407	4.8716	6.9562	11.4485	6.1269
		5.9569	9.433	4.2408	7.1119	11.1907	6.8169
		5.6318	9.7008	4.4252	6.7992	10.9962	5.9866
		5.5334	9.8513	4.7611	6.6087	10.9888	6.2359
		5.5107	9.5898	4.3551	6.455	11.09	7.0748
		5.2762	9.6175	4.5738	6.4887	11.3775	6.5836
		6.0021	9.2592	4.1106	6.1535	11.2796	7.5546
		6.1328	9.5929	4.4508	6.5842	11.5845	7.3259
		5.5068	9.4041	4.4751	6.5398	11.1325	7.229
		5.7601	9.1541	4.6498	7.0133	11.7487	6.539
		6.2221	9.55	4.3672	6.2681	11.0114	5.9222
		5.6316	9.263	4.5078	7.2519	11.3949	6.1349
		5.9406	9.0574	4.2371	6.823	11.6224	5.3692
		6.3285	9.7237	4.6968	7.3865	12.1671	6.2258
		5.5915	9.3026	4.818	7.7455	10.8106	6.0269
		6.9535	10.2074	4.8689	6.6864	10.708	6.2461
		5.5856	9.5313	4.7855	6.9622	10.8096	6.2574
		6.3702	9.1753	4.0523	6.4027	10.9804	5.0788
		6.0658	9.7641	4.5636	6.7861	11.0917	5.013
		5.4276	9.3938	4.4556	6.6565	11.5018	5.0898
		6.6174	9.6651	4.9717	6.5772	11.1656	4.9079
		6.1732	9.1965	4.0509	6.4594	11.3155	5.7485
		5.5824	9.1773	4.206	6.542	10.9352	5.273
		6.486	10.1334	4.8497	6.5751	11.6284	4.6819
		6.0434	9.7055	4.5505	6.4446	11.245	4.8473
		6.0975	9.7604	4.7991	7.2044	12.434	5.3956
		6.4229	10.3481	5.2308	7.5649	12.7318	5.7345
		5.8916	9.899	4.9424	7.1516	10.7767	6.2675
		6.4423	10.3477	5.1559	6.3338	10.6372	4.9421
		6.8611	9.8055	4.6365	6.8135	11.5905	5.1785
		6.3202	10.2122	5.2392	6.9978	11.7279	5.0983
		6.168	9.7331	4.7142	7.2427	12.11	5.9052
		6.3678	10.1836	5.0368	6.816	11.5742	4.7745
		6.0275	9.9368	4.505	6.5609	11.5081	5.2416
		5.7571	10.0758	4.8752	6.6747	11.5274	5.1203
		5.8136	9.6823	4.6158	6.3275	10.9469	5.2401
		5.7344	9.3866	4.3864	6.1987	11.0283	4.7529
		5.9804	9.7939	4.7951	6.2856	11.0681	4.7112
		6.1203	10.2149	5.5676	6.7374	11.481	4.7169
		6.009	9.9558	5.0562	7.2661	11.7717	5.1452
		4.996	9.8408	4.8726	7.2385	11.5429	6.1816
		5.839	10.1025	5.1266	7.4572	11.5216	5.7121
		6.3234	10.5874	5.4333	6.5062	11.2102	4.9889
		6.2812	9.9447	4.9103	6.7839	11.3093	4.7358
		6.5897	9.7714	4.5337	5.8623	10.7823	5.0621
		6.4798	10.027	4.9653	7.0443	11.6926	5.2321
		6.1857	10.2305	4.8919	6.3166	11.2914	4.6874
		5.6518	10.3251	5.3245	6.9063	11.764	4.7238
		6.2076	10.6293	5.4756	6.3026	11.4336	4.6787
		5.4173	9.3498	4.5828	7.0513	11.3943	5.4053
		5.4482	9.6623	4.7665	6.4743	11.4536	4.8837
		5.5148	9.6194	4.7058	6.6404	11.7639	5.1524
		5.8749	9.7279	4.8837	5.6237	11.1746	5.6372
		5.6253	9.1104	4.2278	6.786	11.2225	6.1507
		5.8802	10.0046	4.6001	6.6592	11.491	5.0545
		4.9622	9.4746	4.5497	6.4675	11.4191	4.7872
		6.1973	10.2759	4.7053	6.6865	11.5653	4.8953
		5.5041	10.0801	4.8909	6.7119	11.3949	5.6448
		6.4543	10.5037	5.0648	7.119	11.557	5.3186
		5.9575	10.4356	5.0432	6.6344	11.2037	4.6152
		5.8315	10.0621	4.8447	7.126	11.4898	5.2365
		6.1246	10.0947	5.0712	6.6427	10.8774	5.133
		6.345	10.47	4.9178	6.5261	11.0573	4.8502
		6.1943	9.6438	4.5083	7.156	12.0094	5.1315
		6.1623	9.7527	4.5292	6.9927	11.4002	5.1935
		6.5792	9.7269	4.5737	7.5213	11.4481	5.4815
		6.7671	10.5454	5.5196	7.6716	12.3273	4.9883
		5.8762	9.4964	4.7663	7.7251	12.2336	5.1692
		5.6947	9.6237	4.9676	7.4454	11.6025	4.8164
		5.1449	9.7242	4.6949	7.2599	11.8408	4.5236
		4.5891	9.1538	4.6475	7.6455	12.1961	5.3604
		4.0317	8.6172	4.4374	7.7845	12.6844	5.4398
		4.1358	8.6841	4.5454	7.6495	12.0698	5.4363
		5.0215	9.5979	4.8048	7.205	11.8399	4.7465
		4.6589	9.1711	5.0372	7.368	12.0775	5.0083
		4.6571	8.805	4.2576	7.3702	11.4391	5.4891
		4.8223	8.5141	3.8269	7.2274	11.4184	5.1357
		4.181	9.0463	4.2732	7.1328	11.4479	5.1526
		4.5048	8.8953	4.2271	7.0726	11.3198	5.328
		4.0676	8.9403	4.8967	7.9698	12.4558	5.5146
		4.5653	9.0529	4.9115	7.5549	11.9186	4.9704
		4.4496	9.378	4.7525	7.5207	12.1388	5.304
		4.2255	9.084	4.4236	7.0526	11.4592	5.3327
		5.1348	9.9878	5.0597	7.3962	11.3554	5.0851
		4.8053	9.531	4.8863	7.2553	11.4739	5.3356
		5.0203	10.1027	5.1063	7.1536	11.6603	4.7428
		5.0294	9.6449	4.9489	7.0196	11.2732	4.9668
		4.6324	9.5653	5.0058	6.8491	11.2352	4.9643
		4.1249	9.5144	5.002	6.9955	11.9947	5.0008
		4.5678	8.9858	4.6562	7.8257	12.6088	5.0938
		4.9634	9.1525	4.7055	7.2299	12.046	5.0654
		4.5757	8.712	3.9168	6.9901	11.624	4.8196
		4.6744	9.4404	5.0551	7.46	12.2223	4.5103
		5.0572	9.7015	5.3146	7.6912	12.6392	4.7584
		4.7925	9.9091	5.3064	7.1239	12.8004	4.5688
		4.6316	10.0616	5.6058	7.8979	12.9579	4.9673
		4.5175	10.0082	5.4796	7.7445	12.8014	4.762
		4.7299	9.9757	5.7264	8.2725	13.2696	4.8476
		4.7382	9.4119	5.1969	7.4328	12.0509	4.5386
		4.3768	9.855	5.407	7.5281	12.1222	4.8281
		4.8024	10.0981	5.605	7.779	12.75	5.3823
		5.7085	10.3333	5.5379	7.7879	12.6182	5.3033
		5.4002	10.4053	6.0618	7.6199	12.7021	5.1634
		5.445	10.743	6.6208	8.0652	13.2785	4.3253
		6.1459	11.4648	6.6441	7.9204	13.1728	4.4699
		5.9939	10.2823	6.107	8.8403	13.9535	4.9728
		5.9551	10.4496	6.1315	8.0413	13.152	4.5008
		6.8048	10.949	6.2614	7.6412	12.8177	4.1538
		6.3901	10.5138	5.8054	7.5246	12.9978	3.9574
		6.3718	10.5418	5.8015	7.1121	12.6787	3.7959
		6.7749	10.6614	5.9834	7.7661	12.9862	3.702
		6.7607	10.5314	5.8544	8.0732	13.0166	4.5675
		6.2087	9.8702	5.1692	7.8866	12.9008	4.5826
		5.8887	9.4161	4.2197	6.524	11.5065	5.4828
		5.9886	9.5019	4.9686	6.9927	11.8796	6.0244
		6.2103	9.3483	4.9697	7.5465	12.5325	6.7333
		6.2355	9.8146	4.8743	7.056	11.848	6.7165
		5.9742	9.641	4.359	6.8018	11.4155	7.2025
		6.1167	9.7296	4.5719	6.7389	11.6612	6.6858
		6.6148	10.0904	5.2222	7.1117	12.028	7.1825
		6.2911	10.2283	4.8607	6.271	10.6072	6.4663
		5.6254	10.0581	5.1745	6.6078	10.9156	5.8348
		6.1969	9.7054	4.9307	6.6804	11.6179	6.2967
		6.0762	9.6135	4.6729	6.6984	11.2815	6.7169
		6.1574	9.968	4.8212	6.7676	11.4234	5.5105
		6.8373	10.2212	4.8323	6.2165	11.2416	5.5348
		7.0831	10.1754	4.7412	6.6065	11.4094	6.2659
		6.0117	9.4302	4.0794	6.6166	10.7549	5.5802
		5.6169	9.8875	4.9781	7.0269	11.7558	6.0169
		5.0026	9.5991	4.4882	6.0132	10.8908	6.6266
		5.2525	9.7058	4.2816	6.1958	10.7951	7.0502
		5.362	9.4519	4.409	6.8218	11.7965	6.2998
		5.765	9.7114	4.5782	6.0653	10.8013	5.6309
		5.4912	10.2063	4.8851	6.3117	11.0702	5.4302
		5.533	10.2368	5.1739	6.5367	10.8153	4.7382
		4.5116	9.7747	4.8254	6.2875	10.9609	5.8307
		4.4403	9.9307	4.8723	6.2492	11.1794	5.1616
		4.8261	9.9359	5.2303	6.9126	11.8571	5.7329
		4.3674	9.0337	4.9243	7.1803	11.7718	6.2425
		3.9215	9.5637	5.0647	6.7425	10.9802	7.0551
		4.2622	9.2742	5.1783	7.4157	11.8265	5.6788
		4.8056	9.2279	4.9022	6.499	11.1978	6.5212
		6.1413	9.8394	4.8256	7.011	11.4031	6.8611
		5.2816	9.471	4.3819	6.5503	11.1917	7.2433
		5.5888	9.9443	4.7937	6.8419	11.5015	6.364
		5.5736	9.4271	4.1168	6.3988	11.2854	6.0562
		5.8022	9.4423	4.6867	6.9545	11.4162	6.7748
		6.6234	9.8905	4.9449	7.1466	11.9264	7.3152
		5.6003	9.2629	4.5661	7.2674	11.9493	6.9172
		5.1518	9.4086	4.4275	6.3708	11.0571	6.2447
		5.7347	9.5526	4.8697	6.5335	11.1654	5.5818
		5.2496	9.7535	4.2442	5.8076	10.5992	6.2626
		6.4644	9.6404	5.0085	6.926	11.3441	6.9165
		6.4127	9.9703	4.7099	6.7862	11.6467	6.1416
		5.8616	9.2845	4.4507	6.6216	11.3704	5.9764
		5.9153	9.9708	5.1565	7.2164	11.7295	6.655
		6.3479	9.7662	4.7518	6.8969	10.989	7.2095
		6.9293	10.1094	4.8174	6.6249	11.1066	6.694
		6.8785	9.874	4.9872	6.4629	10.3166	7.1827
		6.5657	9.773	4.7201	7.2349	11.6376	6.032
		5.6593	9.2809	4.2134	6.538	10.8594	6.7153
		6.0947	10.0166	4.8339	6.4559	11.3266	5.8741
		6.4951	9.93	4.5629	6.1654	11.2787	6.0554
		5.9841	9.6115	4.5719	6.7249	11.1612	6.7867
		6.7372	9.7563	4.9889	7.2704	12.1012	7.0676
		6.8166	10.8515	5.7836	6.7236	11.434	6.1999
		7.7115	11.6205	6.72	7.3107	12.0646	7.292
		6.7666	11.1871	6.4552	7.2564	12.0964	7.656
		7.3119	11.7062	7.0806	8.7945	13.4074	6.9295
		7.6347	11.4796	6.9817	8.7233	13.4633	8.6732
		7.3008	10.8991	6.0247	7.5395	11.6764	8.4143
		7.4703	11.395	6.7454	8.0278	11.8815	7.8434
		8.017	11.548	7.1142	9.0794	13.421	9.1447
		7.75	11.9419	7.3153	8.3434	13.3385	5.8529
		6.9583	10.988	6.5556	8.5961	13.4568	6.2219
		7.0732	10.8223	6.008	7.7773	11.7867	7.8374
		6.8963	11.0434	5.9817	7.9332	12.2411	8.1295
		6.9882	11.6676	6.711	7.9855	12.0336	7.6966
		7.2361	11.2673	6.6799	7.7537	12.8634	7.3031
		7.6632	11.1247	6.4521	8.201	12.5289	7.8058
		6.9086	10.7714	5.9833	7.6348	11.8236	8.4024
		5.8228	9.8912	5.4227	7.9827	12.2987	10.7434
		5.4948	9.4673	5.2211	7.4892	11.1779	10.0715
		6.3541	10.147	5.7514	8.3064	10.2187	12.1956
		5.473	9.9906	5.5789	8.3363	10.6938	9.9919
		6.6132	9.4653	5.1755	9.2215	11.5407	11.525
		5.776	9.2172	4.8363	8.8983	10.4131	11.0299
		5.4693	8.7144	5.0626	8.319	10.3987	11.6505
		5.7659	9.0014	5.2149	8.5353	10.066	10.312
		5.6405	8.1379	5.2417	9.2829	10.4509	12.0033
		5.6595	8.7416	5.4241	9.2841	10.8579	9.3117
		6.1216	8.9658	4.8946	8.2418	10.7822	9.1165
		5.3914	8.4659	4.7905	8.4775	10.212	8.8854
		6.2034	9.217	5.2311	8.3254	11.2163	9.2691
		6.6015	9.6666	5.887	8.6258	10.4189	9.0017
		7.8367	9.8934	5.4409	8.9391	11.6709	9.9644
		7.0362	9.9267	5.4775	8.8309	10.7247	10.3365
		7.2569	9.8658	5.5712	8.8946	10.5234	10.2454
		7.4204	10.2965	5.8391	8.8742	10.5294	9.6141
		7.054	9.9047	5.5738	8.9933	10.4319	9.9257
		6.8934	9.6434	5.6077	8.7713	10.317	9.4726
		5.6119	8.4738	5.4105	8.3789	10.1607	9.1678
		6.5173	9.7205	5.8478	8.7257	10.3634	10.0666
		6.2941	9.7677	5.9014	8.2977	9.2847	9.8326
		6.366	9.926	5.9361	8.1401	9.7973	9.3462
		5.873	9.3206	5.9431	8.5016	9.7818	9.0927
		6.8079	10.5834	6.4861	8.3483	10.3156	8.9473
		5.9293	10.205	5.883	7.3126	10.2675	8.3005
		5.9847	10.1267	5.9382	7.9241	10.8381	7.7796
		6.0543	9.4346	5.4734	7.9086	11.6223	8.1
		5.5093	8.7177	5.2511	8.0474	10.1007	8.6364
		5.966	9.2684	5.3291	7.6512	9.9115	9.2278
		5.3788	9.1415	5.9559	7.9768	11.2769	8.0566
		6.2855	9.6266	5.7748	8.0097	11.8166	7.6895
		6.33	9.8301	5.9671	8.0966	11.8811	7.0251
		6.156	10.0993	5.795	8.3187	12.1476	6.7715
		6.2341	9.5036	5.2449	7.9583	11.2527	8.0082
		5.9803	9.1062	5.7814	8.2607	11.4287	8.1646
		6.5933	9.8062	5.8679	8.656	10.5423	8.5595
		6.4539	9.9697	5.5646	8.0899	10.8495	8.2032
		6.7252	10.3471	5.8981	8.264	11.4063	7.8694
		6.5321	10.5335	5.7541	8.3182	10.882	8.035
		5.7685	9.7017	5.1152	7.8094	11.2101	7.6537
		6.2061	10.26	5.8518	7.6824	10.9391	7.4112
		5.9365	10.1595	5.5754	7.9858	10.7174	7.6829
		5.5695	9.583	5.6038	7.9378	10.2366	7.6705
		6.3645	11.0136	6.4915	7.8071	11.6147	7.5352
		6.0429	11.0177	6.5058	8.0742	11.4715	7.6464
		6.57	10.7398	6.0379	8.2393	12.0179	7.2838
		6.672	10.6191	5.7555	7.7601	11.6745	6.9448
		6.9109	9.8884	5.1604	7.8836	10.894	7.807
		7.5543	10.4625	5.9682	8.0748	12.3211	7.6124
		6.94	10.3915	5.996	7.9059	11.5773	7.3352
		7.3814	10.7275	6.1688	8.1396	12.4293	6.8409
		7.5352	10.7886	5.9835	8.2202	12.6626	6.6223
		7.282	10.8269	6.1399	7.724	12.3006	6.9845
		6.971	10.726	5.8982	8.0236	11.9217	7.2134
		6.7805	10.416	5.6137	8.424	11.7079	7.3389
		6.8572	10.6084	5.7913	8.236	12.3743	6.8049
		7.4012	10.869	6.3267	8.1978	12.206	6.6446
		7.139	10.8914	6.1312	8.0125	12.9078	6.8024
		7.2885	10.8343	6.1864	7.9877	12.7752	6.2845
		6.5986	10.4604	5.9165	7.5104	12.139	5.9948
		6.692	11.0856	6.7409	8.2285	12.7809	6.4766
		7.1355	11.0734	6.4553	8.4615	12.9617	6.8291
		7.2555	11.1924	6.3656	8.1906	12.1584	6.6309
		6.6523	10.3459	5.2367	7.8349	10.9345	7.8271
		6.2626	9.689	5.3355	8.3524	10.7702	9.0258
		6.307	9.7941	5.4655	8.3016	10.2984	9.1699
		6.8292	10.0527	5.5993	8.9452	11.238	9.4397
		7.0376	9.8737	5.3689	9.183	11.0342	10.3721
		6.5552	9.6303	5.0918	8.7732	11.8309	10.4025
		6.7013	10.5805	5.7137	8.5819	12.357	9.0157
		5.6374	9.4605	4.8633	7.69	10.952	9.1807
		5.5589	9.6702	5.3264	8.1454	11.2255	9.5902
		5.2673	9.3495	5.9834	8.2492	11.3488	9.0717
		5.768	9.6275	6.0177	8.9091	11.011	9.4555
		6.1537	9.366	5.2061	8.3487	10.587	9.0624
		6.8031	9.6521	5.3949	9.0009	10.454	9.6731
		6.6423	10.2663	5.7296	8.6894	9.7854	10.2312
		5.9277	10.1058	5.9431	8.1444	9.9032	10.0474
		5.7314	9.5185	5.915	8.8409	10.4989	10.3352
		5.5989	9.7529	5.3432	8.2378	10.2009	9.1915
		5.5326	9.2815	5.553	8.9366	10.3124	9.1161
		5.7173	9.6996	5.2811	9.2374	11.0761	8.5626
		6.228	9.6124	5.7148	9.4602	12.5142	7.6266
		6.0274	9.8532	5.9927	9.8589	12.9851	7.0159
		6.6109	10.3721	6.3006	10.0636	12.6982	7.8019
		6.6687	9.8029	5.6403	10.3233	13.8808	8.5101
		6.3037	9.3344	5.6267	9.9343	12.5436	8.2954
		6.5612	9.5183	5.7866	10.3978	13.884	8.6789
		6.3858	9.9951	5.9049	10.0979	13.955	8.1436
		6.9435	10.4537	6.2095	9.8414	12.6014	8.0855
		6.089	10.3177	6.2092	9.48	11.7124	7.504
		5.9339	9.9702	5.8293	9.1288	11.9906	7.1175
		6.0131	10.2647	5.8206	9.3082	12.1884	7.9958
		6.8508	10.4066	6.2342	9.1928	13.7346	7.1814
		6.1883	9.8201	6.1197	9.4135	12.095	7.3909
		6.2837	9.9105	5.8083	9.599	12.3909	7.5118
		5.8653	9.5448	5.9687	9.1238	12.6264	8.4136
		5.4112	9.4062	6.0433	9.1461	12.4291	7.863
		5.5613	9.6173	5.4263	9.3534	11.7055	7.5589
		5.7782	9.7208	6.0962	9.671	12.3857	7.2574
		6.9445	10.1763	6.3162	10.9068	13.6536	8.1315
		6.1657	9.6614	5.7554	9.7123	13.193	8.5563
		5.5276	9.571	6.0218	10.3882	13.9513	8.2586
		5.7853	9.8805	5.4947	9.5009	13.2382	7.1495
		6.5463	10.1328	6.1757	10.0823	13.9386	7.5827
		6.5415	10.5139	5.9656	9.2862	12.8135	7.1208
		5.8895	9.5122	5.6277	9.4225	13.1832	7.5822
		5.6248	10.0103	5.5258	8.8989	13.3286	7.3586
		6.0473	10.1089	6.0878	9.2972	14.242	7.7577
		4.9451	9.9181	5.1663	8.177	12.4303	6.0943
		5.0949	9.6893	5.8742	8.723	12.6688	6.0975
		5.4066	10.1455	5.7156	8.2594	13.6032	5.8772
		5.165	9.3046	5.742	8.2829	13.1821	6.6069
		5.1894	9.7551	5.828	8.8085	13.6813	6.0787
		5.6806	9.7597	5.6038	8.8009	13.6494	6.4452
		5.482	10.0241	6.0524	8.6748	13.4387	5.9359
		5.3847	9.9943	6.1512	8.967	14.1545	6.1936
		5.1605	9.6311	5.5641	8.4343	13.6537	5.7679
		5.6216	9.7241	5.4299	8.2451	13.2859	5.8494
		4.7646	9.6426	5.9387	8.5587	13.6021	6.0712
		4.8304	9.8303	5.2444	8.4337	12.5297	6.2664
		5.2449	9.5982	5.1782	8.2616	12.6349	5.7607
		5.343	9.8314	5.2489	8.3953	13.2781	5.7403
		4.8732	9.6317	5.5499	8.2118	12.3863	6.4993
		4.7968	9.7138	5.7498	8.0395	12.6969	6.0232
		5.6321	9.7776	5.5737	8.5919	13.1118	5.792
		5.1776	9.1733	5.7673	8.6537	12.542	6.3946
		5.0564	9.106	5.5926	8.7655	13.1164	5.9021
		5.2206	9.5639	5.8921	9.4028	13.9064	6.3382
		5.7768	9.9981	5.3637	8.9195	12.6124	6.9399
		5.6478	9.9495	5.1823	8.4297	12.6231	6.4348
		5.7382	9.6506	5.8796	9.1992	12.825	7.5532
		5.2152	9.6913	5.8815	9.6866	12.7151	8.0314
		5.0624	9.3847	5.9461	9.4292	12.8462	8.5483
		5.5077	9.6534	6.0361	9.6831	13.2792	7.6975
		6.1412	9.8415	5.8189	9.6951	13.9194	7.414
		6.274	10.3027	6.2305	9.8955	13.773	7.0929
		6.6474	10.151	6.0405	10.2485	13.8904	8.1815
		6.3503	10.2828	6.2653	9.9725	13.2171	8.147
		5.8536	9.7828	6.1448	10.0847	13.6357	7.4595
		6.9397	10.3197	6.0577	10.2428	13.7272	7.6427
		6.253	9.7716	5.9905	9.9837	13.9974	7.8078
		5.9668	9.5726	5.4579	9.2887	13.4176	7.9842
		6.0403	9.9724	5.7039	9.4903	13.159	7.6624
		6.0322	9.6275	5.5521	8.9	13.0876	8.1195
		6.0943	9.6984	5.5081	9.3123	12.8982	7.5849
		5.8618	9.443	5.3105	8.7256	12.8978	8.766
		6.0365	9.6604	5.4427	8.7658	12.2679	7.8642
		6.147	10.2129	5.54	8.5122	11.3383	7.9822
		6.1958	9.9436	5.6235	8.3742	10.3454	7.8456
		6.7166	9.9476	5.5645	8.6569	12.1642	8.1593
		5.7905	9.4112	5.5118	9.0104	10.3187	9.1492
		5.5087	9.4411	5.6185	8.5804	10.7059	7.9505
		5.6069	9.614	5.4925	8.3075	10.1625	8.1676
		5.6566	9.5965	5.0597	8.4082	11.5695	8.5741
		5.9016	9.6368	5.6514	8.8667	11.249	7.4334
		5.6624	9.5306	5.4397	8.6797	11.0845	8.3417
		5.8956	9.6857	5.4635	8.4812	10.4036	8.4495
		5.4394	9.2311	5.0197	8.5848	11.3454	8.2515
		5.2595	9.5409	5.3047	8.5866	10.5283	8.4695
		5.6793	9.719	5.4097	8.9003	10.5847	8.1975
		5.6097	9.5115	5.3523	9.184	10.7009	9.8467
		6.4237	9.9837	5.8467	10.1871	11.0822	10.4504
		6.3116	9.8798	5.2986	9.7122	11.2285	9.6727
		5.8526	9.5146	4.9668	8.7189	10.4029	9.7172
		7.1141	10.2234	5.521	9.2906	11.9483	9.1164
		6.6375	9.6164	5.0137	9.2571	10.441	10.1721
		6.218	9.4147	5.6763	10.0897	11.6114	10.5286
		6.1788	8.7948	5.3957	9.9047	11.2967	10.8832
		5.486	8.4981	5.3338	8.6948	9.4235	10.6107
		6.123	9.5597	5.5324	8.9415	9.7139	10.2281
		5.6338	9.203	5.9085	8.9874	10.5259	10.3701
		5.4385	8.9275	5.3735	8.4657	9.9891	10.3973
		5.1608	9.0607	5.3785	9.0004	9.1363	10.3656
		5.3417	8.8978	5.4408	8.8649	9.9119	10.1606
		6.1789	9.4973	5.6795	9.1424	9.5017	10.1552
		5.7746	9.2419	5.6515	8.9843	9.4896	10.0209
		5.6895	9.1572	5.9026	9.4148	10.92	9.3947
		5.8473	9.25	5.5352	9.0198	10.4581	9.8367
		5.6167	9.2019	4.9371	7.9659	10.1133	9.0575
		5.7429	9.3438	5.5083	8.39	9.9984	9.3709
		6.1933	9.699	5.1147	7.7159	10.1693	7.87
		5.6722	9.3157	5.3278	7.7968	11.1546	7.7226
		6.227	9.8469	5.6606	8.0537	11.8459	7.4275
		6.8709	10.4489	6.0727	8.1856	12.136	6.577
		6.2484	9.5026	5.9079	8.7693	13.0401	7.9605
		6.1016	9.9232	5.6657	8.2514	12.2226	7.4042
		5.8002	9.399	5.7503	8.3782	11.6419	7.8541
		5.5145	9.5383	5.7357	7.4263	12.3095	7.7584
		5.9682	8.9274	5.9713	8.5533	11.598	8.851
		5.9518	9.3762	5.6666	9.0612	12.4788	9.3464
		5.9785	9.3771	5.9298	9.2299	11.5688	9.2492
		6.2022	9.2291	5.7367	8.4522	10.7893	9.2845
		6.393	9.375	5.8244	8.4386	12.3565	9.2006
		6.4069	8.9407	5.6804	8.8078	12.4661	10.2577
		5.6507	9.6333	5.8287	8.3742	11.1777	9.8451
		5.4866	9.1594	5.7223	8.5605	11.8129	9.7211
		5.8644	9.2897	5.6508	8.7434	11.2872	9.8411
		5.4491	8.8546	5.4747	8.5968	10.5957	9.1834
		6.6818	9.2398	5.5051	9.4475	12.8397	9.7567
		6.6353	9.6785	6.1148	9.7565	12.101	8.4123
		6.5925	9.5449	6.0239	9.3752	12.275	8.3391
		5.685	9.2463	5.5095	9.2026	12.2972	8.4828
		6.0775	9.5375	5.1774	8.4655	11.0991	9.1186
		6.4166	9.4333	5.2967	9.2656	11.4967	10.0785
		5.9465	9.3625	5.5069	9.1408	11.5299	9.9762
		5.8487	9.6539	5.7611	8.6243	10.7381	9.6549
		5.7925	9.3797	5.4739	8.4093	10.3721	7.8592
		6.1592	9.2093	5.5968	8.806	10.6034	8.1292
		5.236	9.1821	5.6975	8.5642	10.8587	7.865
		5.6412	9.3869	5.5051	8.7377	10.4242	7.7763
		5.5904	9.3287	5.6291	8.7709	10.578	8.1627
		5.8693	9.5544	5.679	8.6691	10.2299	8.4365
		5.6368	9.1496	5.3681	8.248	10.2208	8.4623
		6.1824	9.3648	5.0835	8.5984	10.0673	8.969
		6.2081	9.586	4.8746	8.2812	11.674	7.963
		5.5382	9.8817	5.5189	8.4404	10.391	7.7099
		4.7731	9.4261	5.3763	7.6623	10.1291	7.9831
		4.7687	9.5444	5.399	8.3496	10.0155	8.2118
		5.3541	9.5724	5.7255	8.5413	10.7133	7.928
		5.4893	9.9053	5.5777	8.5909	10.5967	7.7561
		5.9651	10.26	5.7349	8.8394	11.0794	7.9548
		5.5085	9.6059	6.5405	9.4452	10.719	8.8005
		5.7714	9.8808	5.9959	9.1502	11.5453	8.2312
		6.0319	10.2547	6.4647	9.1953	10.7542	9.0138
		6.1408	10.7013	7.7988	9.5228	10.6412	9.2417
		6.5576	10.7466	8.0018	9.3758	11.2578	9.1551
		6.7259	10.4013	7.9859	8.835	10.6555	9.5865
		6.2364	11.0082	8.1154	8.4044	10.0686	9.1476
		6.6074	10.1251	8.0198	8.3784	9.7931	9.0448
		6.5732	10.379	7.9037	8.5492	9.6086	8.7131
		6.9167	10.5839	7.9441	8.2603	9.4889	8.8012
		7.4237	11.3627	8.5267	7.9711	8.8684	9.3794
		6.8444	11.1238	8.2088	8.9629	10.685	9.2461
		7.3508	11.6747	9.0187	9.2566	10.0141	9.439
		6.8057	11.2006	8.6369	9.2868	10.0872	7.982
		6.7127	10.9372	8.0924	8.4815	9.4221	8.5846
		6.8441	10.8833	8.5751	8.6522	9.6115	7.7168
		6.2074	10.6103	7.8607	8.8855	10.0328	7.8232
		6.4943	11.1254	8.5267	8.8468	9.7971	8.2791
		5.9144	10.612	7.9616	8.8006	9.7507	8.992
		5.8231	10.3916	7.7137	9.2743	9.1715	10.4237
		5.8004	10.4794	7.4695	9.1416	9.5077	9.4665
		6.3313	10.7685	7.6323	9.3737	9.7563	9.9776
		6.2932	10.0167	8.3426	9.7128	10.5068	10.1208
		6.0748	10.2135	7.9744	9.379	10.4864	9.1401
		5.2758	10.0813	7.2294	8.7967	9.8244	10.4744
		6.2931	9.7574	7.0544	9.78	9.8292	11.8687
		7.0343	10.3904	7.1131	9.8646	8.7586	12.1435
		6.9694	10.3213	7.4362	9.6132	9.3136	12.8165
		6.5808	10.4276	6.9004	9.2872	8.5382	11.831
		7.3009	11.4751	7.945	9.6483	9.0443	12.3563
		6.9776	10.4365	7.7123	10.1417	9.7825	11.5406
		7.1622	10.7546	7.5698	9.9792	9.6058	10.4659
		7.6	11.3543	7.7352	9.4532	9.3168	10.9291
		7.9222	11.7663	8.5578	9.5035	8.8706	11.2019
		7.3066	11.9959	8.4224	8.3761	8.9779	9.027
		7.2853	11.7216	8.38	8.871	8.4982	8.4377
		7.7162	11.6813	7.2355	8.3281	9.853	7.8076
		8.8638	13.7129	9.8304	11.5878	11.862	9.4172
		8.3793	12.8909	8.9482	11.4504	12.602	8.4527
		8.9032	13.8344	10.1134	11.3947	12.9121	8.3695
		9.6499	15.3384	11.5439	12.1393	13.608	9.2695
		9.1546	15.0299	11.1775	11.0628	11.3008	8.772
		8.9962	14.9976	11.4085	11.3701	11.7067	9.3033
		9.6407	15.1704	12.1368	11.625	11.8763	9.0596
		9.9206	15.209	12.7311	12.443	14.1479	8.9723
		9.474	15.4143	12.1772	11.5563	10.2321	8.5413
		8.9763	13.9564	11.6822	12.1471	11.3269	10.1999
		9.1761	14.0324	11.5529	12.658	12.7051	9.7101
		9.2308	13.2852	10.2558	11.253	13.2829	8.8041
		8.4843	12.9351	9.4286	9.8393	12.1801	7.8674
		8.59	12.1315	9.4241	10.516	14.4293	7.0535
		8.177	12.6115	9.2662	10.4108	14.2078	7.2691
		9.3319	13.1399	9.9051	11.9815	15.3356	7.4947
		8.5543	11.7881	9.1281	11.4365	15.3624	7.9225
		9.3544	12.7244	9.1296	12.4915	15.9918	7.9525
		8.9655	12.183	9.861	12.0224	15.973	6.7054
		9.2591	12.9057	9.2733	11.4839	15.752	5.8979
		8.5714	12.159	9.5551	11.0572	15.1338	5.5054
		7.8599	10.9562	7.759	11.103	14.7474	6.3596
		8.3778	11.833	8.3306	10.7379	14.6211	5.4833
		8.4754	11.3866	7.8162	10.9637	15.8567	5.7399
		8.5735	11.3891	8.6144	11.2339	15.5885	5.812
		8.9089	11.5639	8.3606	11.1392	16.1222	5.5157
		8.5299	11.1585	8.3771	11.0043	16.0683	5.2946
		8.6427	11.4748	8.8059	11.7606	16.6387	5.7384
		8.81	11.4436	8.9944	11.482	16.5159	5.6991
		8.3023	11.7764	8.9756	11.1473	16.4336	5.3663
		8.6171	11.9031	9.1003	11.444	16.5725	5.273
		8.6192	11.9475	8.5962	11.1702	16.7985	5.8451
		9.2782	11.8734	8.6341	11.1399	16.3398	5.5789
		9.2354	11.7759	7.9109	10.5238	15.844	5.2151
		9.3904	11.5584	8.2046	10.9826	16.0368	5.7846
		9.9625	12.1393	8.5723	11.481	16.4559	5.5306
		9.3266	10.3848	7.6408	11.4557	16.4352	6.3151
		9.3704	10.5651	8.0395	11.909	16.8544	6.8651
		9.9018	10.3822	8.853	12.5835	17.8453	7.6713
		9.3075	10.073	7.9713	11.9242	17.0017	6.9492
		10.1434	11.4962	8.3473	11.9156	17.1383	6.6881
		9.6918	11.3024	8.0541	11.6275	16.8866	6.4981
		9.0272	10.8772	7.7139	11.4564	16.5481	6.4225
		9.6283	11.8174	8.3099	11.5498	16.7739	6.4849
		8.9066	11.5242	7.957	11.1664	16.3762	6.0955
		8.0797	11.0752	7.3816	9.8486	15.1817	5.0028
		7.3295	10.6078	6.5755	9.2726	14.3375	4.7682
		8.0079	11.2663	7.0852	10.1461	14.6335	5.2909
		7.2928	10.912	7.3917	10.5107	15.1164	5.5901
		7.6553	11.0447	7.3293	9.8026	14.0841	5.4199
		7.1135	10.712	6.6518	9.2256	13.2744	5.5215
		6.7945	10.7155	6.6731	9.0982	13.4008	5.5206
		6.9195	10.1074	6.2519	9.4573	13.3184	6.1296
		7.0108	10.5509	6.6388	9.2458	13.2248	6.0965
		6.2226	9.5953	4.9774	8.1805	11.8544	5.5823
		6.4512	9.8929	5.6096	9.2055	12.4616	6.5348
		6.1742	9.8845	5.4987	8.8435	12.4822	6.1911
		5.9153	9.9124	5.4791	8.7572	12.2086	6.1594
		5.4398	9.6616	5.2574	8.7623	12.1031	5.8052
		5.9532	9.159	5.1701	9.002	12.8794	5.4563
		6.2099	10.272	5.6735	8.758	12.6387	5.9446
		6.0288	9.5726	4.9526	8.4971	12.6137	5.5664
		6.252	9.4625	5.2851	9.1617	13.014	5.621
		6.088	9.1326	5.5174	8.95	12.8379	6.2838
		5.4796	9.0932	5.707	9.2211	13.2419	5.506
		6.0345	9.7353	5.5375	8.2608	12.2599	5.3662
		6.504	9.9344	5.4875	8.7572	12.6172	5.9349
		6.2278	9.8532	5.3733	8.6676	11.6182	5.9817
		6.2455	10.0405	5.8936	9.2863	12.3389	5.8109
		6.7277	10.3267	5.4115	8.3827	11.7336	5.8406
		6.1991	9.9822	5.5507	8.593	11.6155	6.1618
		5.8796	9.5812	5.3851	8.6811	12.3442	5.4625
		5.6774	9.6446	5.5446	8.8161	11.789	5.8773
		5.762	10.1063	5.4199	8.4055	11.2314	5.9351
		5.7373	9.9661	5.6559	8.9048	11.9645	5.9759
		5.3145	10.3163	5.7623	8.4648	11.2975	5.8618
		5.2037	9.3474	5.3289	8.8041	12.089	5.8051
		5.7826	9.6016	5.6274	8.5557	11.6755	5.897
		5.6979	9.6492	5.2009	8.0959	12.2609	5.5061
		6.1169	9.3946	5.4024	8.6485	12.0629	5.9763
		6.0128	9.7862	5.4002	8.9041	11.8229	5.9969
		6.1434	9.4722	5.3535	9.0206	12.9908	5.6041
		6.0176	9.4351	5.3673	9.0114	12.719	5.6247
		5.2962	8.9485	5.1972	8.806	12.1333	6.0455
		5.8092	9.4566	5.8719	9.178	12.8387	6.2402
		5.836	9.5142	5.6024	8.9446	12.4853	5.9511
		6.3247	9.7855	5.5036	8.7594	12.5587	5.8029
		6.1073	9.8985	5.2755	8.7941	11.8439	6.1286
		5.5503	10.196	5.4206	8.6696	13.6559	5.7094
		5.9454	9.4757	5.1567	8.5352	12.6656	6.0713
		6.7788	10.1656	5.4533	8.6696	12.2448	5.5317
		6.0855	9.9287	5.4195	8.5851	12.4533	6.1397
		6.0308	10.3272	5.7089	8.8602	12.3168	5.5879
		6.0987	9.9002	5.7207	8.952	12.532	5.4083
		6.1352	10.1277	5.9926	8.7488	12.4199	6.0764
		5.7895	9.5565	5.3743	8.6843	11.461	6.0701
		6.0332	9.8524	5.1549	8.5875	10.9299	6.2302
		5.285	9.248	5.3739	8.5571	12.4554	5.6423
		5.7894	9.7023	5.4456	8.5386	11.8686	5.8891
		6.5165	10.0343	5.5226	8.5965	11.9239	5.6595
		6.6743	10.5349	5.7846	8.8646	13.0035	5.4282
		6.1332	9.8217	5.2661	8.1956	12.4954	5.7785
		6.2087	9.8232	5.5087	8.5649	12.3187	5.5366
		6.0739	10.2577	5.6357	8.6539	12.5692	5.5729
		5.67	9.6985	5.696	8.5781	11.7802	6.1049
		6.6897	10.0265	6.2447	10.0037	13.835	6.4065
		7.1119	10.5866	6.4478	9.8723	13.8893	6.1084
		6.478	10.514	5.7558	8.5675	11.8785	6.1338
		6.1011	10.1091	5.6577	8.4388	12.815	5.3098
		5.7557	9.4397	5.6438	8.6116	12.8777	5.5095
		6.1486	10.3375	5.9219	8.1809	11.6431	6.2556
		5.4265	9.7387	5.3215	7.9678	11.6798	5.551
		5.6488	9.6661	5.2436	8.5133	11.803	6.1648
		5.474	9.3744	5.342	8.6793	12.7507	5.6301
		5.9105	9.7851	5.8422	8.8376	12.9302	5.6518
		5.7391	9.2889	5.5475	8.931	12.5737	5.6413
		5.9381	9.7614	5.8197	9.1225	13.1275	5.6745
		5.7475	9.7086	5.3548	8.3131	11.9235	5.6241
		5.657	9.9902	6.0916	9.1733	12.2754	5.8469
		5.5322	9.5168	5.4481	9.0921	12.596	6.2311
		6.1555	9.9412	5.3289	8.3934	11.9048	5.3798
		5.8373	9.7989	5.1601	8.8995	12.1357	5.7336
		6.5513	9.8492	5.5142	8.6334	13.311	5.6653
		5.7945	9.4893	5.4644	8.7205	12.3065	5.6917
		6.2648	10.208	5.8144	8.5854	12.1962	5.4436
		6.4436	9.4318	5.4159	8.3111	12.5581	5.6283
		6.3885	9.3779	5.7077	9.3652	13.3019	5.8843
		5.6241	9.0511	5.5509	8.9871	12.6757	5.94
		5.2139	9.1558	5.2665	8.6216	12.109	5.6204
		5.9329	9.378	5.7138	9.1151	12.7079	5.6248
		6.1599	9.7012	5.6572	8.7285	12.8986	5.5184
		5.3388	9.2572	5.6423	8.6542	12.5098	5.7774
		5.681	9.4983	5.8309	8.9037	11.7511	6.1349
		6.6186	10.0698	5.8826	9.0155	13.0455	5.5863
		6.3636	9.6013	5.6759	8.576	12.3476	5.659
		6.1299	9.3551	5.5037	8.7856	12.2137	5.6545
		6.5695	9.605	5.5437	8.812	13.2238	5.2697
		6.5903	9.7224	5.7649	9.4688	13.1008	5.5492
		5.8826	8.9334	4.9859	9.3215	12.6022	5.74
		6.0749	9.8727	5.5178	9.0735	12.4722	5.7861
		5.4574	9.9949	5.8475	8.642	12.2928	5.9099
		5.6397	9.7952	5.7534	8.5709	11.497	5.8124
		5.5604	9.7051	5.6206	8.5215	11.725	5.4217
		5.7204	9.9771	5.799	8.8044	12.7148	6.0625
		5.3104	9.4484	5.5881	9.0645	12.1179	5.845
		5.3271	9.52	5.4372	9.0589	11.2205	6.1543
		5.3768	9.8931	5.5579	8.6777	11.1174	5.5307
		5.9005	10.006	6.2722	8.585	11.3228	5.7742
		5.4091	9.2553	5.2098	9.0668	12.0772	5.6649
		5.7399	9.8071	5.9128	8.8589	11.5887	5.2346
		5.8399	9.6846	5.3717	8.2473	11.6941	5.6237
		5.7887	9.5153	5.6236	8.36	11.9935	5.7104
		5.9645	9.6262	5.7843	9.0356	12.5085	5.9023
		5.6574	9.5006	5.5268	9.1671	12.8899	5.6706
		6.0982	9.4999	5.3073	8.9404	12.8357	5.5501
		5.8241	9.6637	5.5864	8.7655	13.1953	5.4044
		6.4853	9.6954	5.976	9.4954	14.4819	5.6114
		5.7511	9.3588	4.9352	9.0262	12.6643	6.3312
		6.6025	10.2972	5.9541	9.4713	12.5991	5.6147
		6.3862	9.8085	5.1831	8.8802	11.9333	6.1275
		5.7407	9.6386	5.5027	8.8518	11.8051	5.7199
		5.9009	9.748	5.3307	8.6639	11.9569	5.9604
		6.0758	9.7205	5.379	8.856	12.6389	5.64
		6.5904	10.383	5.8379	8.2181	12.2519	5.6409
		5.8846	9.9114	5.2919	8.0892	12.1619	5.7605
		5.5665	9.6639	5.6363	8.7104	12.0132	5.7348
		5.2084	9.6669	5.2614	8.4855	12.226	5.7733
		5.6552	9.7116	5.2332	8.3768	11.8157	5.7574
		5.2951	9.6668	5.4826	8.182	11.6918	5.6371
		5.4416	10.3302	6.4852	8.4637	12.005	5.3693
		4.9289	8.8787	5.2643	8.8851	12.5845	6.1862
		5.4217	9.5554	5.5952	8.8164	12.5378	5.679
		5.11	8.9966	5.2333	8.6434	12.2963	5.9755
		4.6835	9.7408	5.7169	9.0261	11.8637	5.9024
		5.5832	9.3324	5.3671	8.8105	12.2613	6.1131
		5.5887	9.6375	5.7811	8.3065	12.1272	5.727
		6.5623	10.078	5.6187	8.6934	12.6633	5.8406
		5.3242	9.2928	5.4743	8.917	12.33	6.1441
		5.6277	9.4421	5.3496	8.6406	12.3881	5.7312
		5.1715	9.5306	5.0741	8.0243	12.2685	5.6626
		5.2713	9.8914	5.6323	8.7523	13.1479	5.8968
		6.0042	9.8846	5.0386	8.058	11.8797	5.9304
		5.5073	9.3816	5.3699	8.0953	11.167	5.8761
		5.8485	10.3211	5.5847	8.486	11.4036	6.1206
		5.5376	10.1098	5.7643	8.5636	11.5439	5.7083
		5.191	9.1876	4.9392	8.7762	12.5406	5.5278
		5.4728	9.6961	5.7969	8.8754	12.1768	5.8738
		6.1863	9.5338	5.2734	9.3859	12.6942	6.1722
		5.5382	9.1868	5.466	9.477	13.8188	5.8278
		5.6729	9.3517	5.6254	9.0376	13.7331	5.6677
		5.4254	8.8543	5.7743	9.4167	13.3658	6.6823
		5.1053	8.8451	5.6618	9.2307	13.1608	6.1957
		5.0043	9.1598	5.959	9.3341	12.7377	5.7639
		4.9605	9.124	5.3885	8.7591	12.5453	5.6764
		5.3519	8.8926	5.646	9.5029	12.8727	6.9057
		5.5325	9.7056	5.8223	8.6044	12.1273	5.8689
		5.3261	9.7747	5.4789	8.9805	12.549	5.5721
		4.9855	9.3624	5.2723	8.5002	12.0589	5.7529
		5.1598	8.9457	5.3799	8.5337	12.0722	5.5083
		5.817	9.3461	5.8374	9.0871	12.4018	5.702
		5.1946	9.4436	5.7475	8.8163	12.7306	5.6001
		5.6278	9.2768	4.9678	8.3565	12.351	5.478
		5.6212	9.5195	5.4806	9.2436	11.9628	6.1479
		5.0362	9.203	5.5274	8.7965	12.4692	5.9134
		5.2565	9.6556	5.1996	8.488	12.4683	5.6109
		5.461	9.749	5.5119	8.8243	12.4595	5.7641
		5.6531	9.6629	5.4549	8.4618	11.5676	5.819
		5.2171	9.2645	5.5136	8.7664	12.4875	5.1064
		5.4164	9.4119	5.409	8.6642	12.5514	5.8649
		5.6372	9.6417	5.0709	8.8165	11.9193	6.206
		5.374	9.862	5.0064	8.5195	12.4504	5.8502
		5.7766	10.1926	5.8928	8.98	12.4231	6.1369
		5.546	9.8988	5.209	8.2732	12.0559	5.809
		5.4902	9.8806	5.553	8.7918	12.4676	6.0013
		5.8809	9.9302	5.2706	8.4369	11.3482	5.5119
		6.1611	10.244	5.4413	8.4736	11.3696	5.9844
		5.6862	9.7489	5.3105	8.6629	11.6464	5.6977
		5.8204	9.8355	5.6186	8.0437	11.5393	5.548
		6.0264	10.0254	5.2873	8.0584	12.731	5.1317
		5.5293	9.8225	5.3608	8.5233	12.1433	5.2102
		6.003	10.037	5.9212	8.641	12.8186	5.3001
		6.1314	9.3344	5.4174	8.9848	13.0627	6.0045
		5.5115	9.5324	5.1031	8.6028	12.5279	5.5708
		5.2491	9.4244	5.4777	8.4524	12.2213	5.5848
		5.6702	9.705	5.2633	8.7814	12.5053	6.0048
		5.7693	10.0803	5.5336	8.585	11.6102	5.4568
		6.1333	9.4086	5.3999	8.7063	11.8155	6.3111
		6.357	10.3319	6.1896	9.5063	12.2306	6.585
		5.912	9.2739	5.17	8.771	12.2958	5.6246
		6.0096	9.5808	5.3567	9.1911	12.8412	6.0299
		5.9556	9.703	5.3066	8.4935	13.0274	5.7131
		5.8219	9.1562	5.1818	8.8683	12.3678	5.6851
		6.3492	9.9887	5.4981	8.3699	13.0654	5.5409
		6.0028	9.739	5.434	8.6699	12.7341	5.6868
		5.3943	9.1943	5.2426	9.0048	12.6879	5.4775
		5.3106	9.4585	5.3925	8.6317	12.7754	5.8217
		6.2515	9.7096	4.8944	8.765	12.8156	5.5367
		6.1742	9.9849	5.5534	8.3007	12.3492	5.6797
		6.1646	10.0167	5.7359	8.3387	11.68	5.9695
		6.3336	9.8791	5.4294	8.5149	11.7837	5.9695
		5.6931	9.7158	5.1565	8.5363	11.7528	5.8826
		6.1128	9.4305	5.511	9.017	12.9707	5.9397
		6.7935	9.7776	5.6499	9.6093	13.2335	5.8835
		6.6469	9.8068	5.5986	8.6705	12.2206	5.3431
		5.7807	9.3694	5.3629	8.7315	12.5665	5.2215
		5.9771	10.05	5.1866	8.5994	12.6959	5.6024
		5.8497	10.2987	5.9071	8.4998	12.0741	5.6444
		5.0508	9.4633	5.8281	8.6214	12.1334	5.5434
		5.1708	9.6164	5.3091	8.5312	12.1811	5.7982
		5.3982	9.4291	5.3099	8.6646	12.2748	5.5684
		5.7651	9.6846	5.3388	8.1816	11.9664	5.5179
		6.1867	9.7197	5.1964	9.0552	12.4374	5.7409
		5.7502	9.914	5.6439	8.5521	11.9219	5.9023
		5.7902	9.3471	5.4091	9.1478	12.7101	5.8391
		6.4009	9.7605	5.0982	8.9554	12.4388	5.7292
		6.3374	9.5345	5.3661	9.4449	13.0932	5.5703
		6.0123	9.4948	5.6425	9.0031	12.8871	6.4823
		6.0014	9.8732	5.6697	8.4593	12.1528	5.8843
		5.5008	9.4081	5.474	8.4429	11.8747	5.843
		5.9882	9.6232	5.9475	9.2291	12.2968	6.8216
		5.8769	10.2501	5.6493	8.7239	12.0639	5.6437
		5.2304	9.5669	5.381	8.4446	12.1948	5.6722
		6.168	10.043	5.6181	8.7393	12.1737	6.3058
		5.9191	9.9216	5.6886	8.5797	12.2113	5.3974
		6.2738	10.3307	5.7694	8.7811	11.3729	5.8293
		6.1824	9.936	5.4291	8.6934	12.0119	6.1896
		6.1579	9.878	5.2596	8.7275	10.9571	5.7158
		6.1242	10.0448	5.3388	8.6757	11.45	5.8626
		6.7532	10.8477	6.0423	9.1699	12.4924	6.4466
		6.0546	10.1698	5.4322	8.1631	11.4162	5.7431
		6.3608	10.1517	5.6499	8.7519	12.0897	6.1829
		5.9719	9.8239	5.7111	8.8189	12.8228	5.6188
		5.6995	10.1707	5.4233	7.9256	11.9439	5.526
		5.7997	9.7184	5.411	9.1522	12.9858	5.7857
		5.896	9.9641	5.796	9.6524	13.2786	6.1478
		6.8406	10.9768	6.8673	9.7549	13.9343	5.2835
		6.0235	10.6531	6.5757	9.664	13.4431	6.0176
		6.5443	10.4857	6.4381	10.2444	14.1262	6.4199
		6.789	10.7231	6.0432	9.2408	12.8901	5.4251
		6.2129	9.9236	5.1821	8.9099	12.8579	5.5718
		6.2056	9.4707	5.4442	8.6859	12.4973	5.548
		6.057	10.0335	5.5278	8.653	12.5148	5.7512
		6.1016	9.7148	5.0652	8.3354	11.3735	6.1098
		5.981	10.0727	5.5286	8.289	11.4619	5.593
		6.3597	10.1962	5.4411	8.5247	11.4431	6.0359
		6.8674	10.2526	5.2754	8.4398	11.6842	5.879
		6.2794	9.5134	5.0667	8.449	11.548	6.2324
		5.9388	9.791	5.3937	9.0322	12.6833	5.9537
		6.5439	9.8633	5.529	8.6441	12.3638	5.5519
		6.1948	9.3868	5.4056	8.9484	12.3213	5.7081
		6.4965	10.063	5.5868	8.5683	12.0228	5.6717
		7.0804	9.9301	5.6466	8.5489	12.0789	5.5491
		6.6224	9.761	5.3656	8.4227	12.6362	5.3039
		6.2013	9.2464	4.7482	8.53	12.5382	6.1537
		5.5221	9.1683	5.4984	8.7815	12.2903	6.0282
		6.0427	9.88	5.4021	8.6078	12.0093	5.7295
		6.6836	9.8965	5.5983	8.3191	12.4513	5.8312
		6.262	9.694	5.3784	8.7277	12.5391	6.1217
		5.948	10.0537	5.8215	8.3993	12.5256	6.1746
		6.6714	10.6954	6.6784	9.1428	12.7174	5.8952
		6.7478	10.5704	5.7345	8.0083	12.3406	5.6415
		6.2053	10.5622	6.0445	8.3404	11.4627	5.6368
		6.8939	10.142	5.7224	8.8988	12.3229	5.9836
		6.7121	9.7544	5.8484	9.0255	12.6585	5.9496
		6.9826	10.0155	5.6529	8.3146	12.4805	5.4841
		6.3581	9.807	5.5962	8.951	12.7833	6.2547
		5.8681	9.6424	5.4397	8.8041	12.4015	5.2588
		6.48	10.2234	5.4456	8.7472	12.418	5.6887
		5.4941	9.2094	5.483	8.9997	12.8419	6.194
		5.6615	8.8849	5.3249	9.1551	13.4034	5.7911
		5.6043	8.6535	5.3389	8.7333	12.5166	5.5226
		6.7125	9.3977	5.2078	9.3586	12.668	6.7135
		6.809	9.3441	5.451	9.2874	13.671	6.0422
		6.1361	9.6178	5.71	8.7438	13.6305	5.4894
		5.1512	9.0223	5.4857	8.8926	12.7902	5.8953
		5.4132	8.8989	5.6952	9.1245	13.0776	6.1215
		5.5826	9.514	5.377	8.9352	12.0296	6.3183
		5.4292	9.5757	5.5258	8.5909	12.4481	5.8329
		5.6076	9.5786	5.6824	8.4834	12.0933	5.4747
		5.9558	9.7669	5.7427	8.5764	12.2188	5.4344
		6.7401	9.7459	5.844	9.0126	13.4309	5.6595
		6.2137	9.0541	5.7496	8.3491	12.3216	5.6997
		6.5778	9.1363	5.75	8.8875	13.3081	6.1064
		5.9763	8.8405	6.0921	9.106	13.4081	5.9694
		6.5351	8.9083	5.7899	8.6405	13.0736	5.7241
		6.6288	8.8946	5.957	8.766	13.4236	5.7922
		6.6916	8.7264	5.5265	8.9338	13.3993	5.9382
		7.0742	9.5683	5.4243	8.7972	13.0372	5.3746
		6.8743	9.4169	6.2147	9.0945	13.2776	5.4741
		6.2831	8.992	5.9622	8.7124	12.8555	5.7825
		7.0608	10.023	5.4479	8.2457	12.6582	5.6043
		5.956	8.994	5.6005	8.8431	12.9571	5.5203
		6.6788	9.9738	5.752	8.5887	13.0921	5.2909
		7.477	10.7509	6.8882	9.7514	13.7009	5.2704
		7.6114	11.2796	6.5331	8.7119	12.9542	5.0029
		7.577	11.4531	7.0361	9.67	14.0307	4.8971
		7.7464	11.4121	7.1402	9.1453	14.221	4.6177
		8.2172	11.6168	7.3642	9.3099	14.0809	4.7146
		8.2311	11.1398	7.1906	9.6179	14.8516	5.0838
		7.657	11.2708	7.5598	9.5313	14.6527	4.8254
		7.1361	10.368	6.9525	9.4539	14.486	5.0878
		7.1597	10.572	6.832	9.1717	14.3632	4.9898
		7.2804	10.495	6.7556	9.4618	14.5418	4.922
		6.7449	9.5725	6.4429	9.2721	13.9937	5.2749
		6.8759	9.7926	6.5514	9.6589	14.0705	6.0336
		5.9973	9.1727	5.8267	9.2293	13.5636	6.1225
		5.8056	9.3859	5.6807	8.5873	13.4496	5.4987
		6.091	9.1567	5.4967	8.7616	12.8863	5.8072
		6.1429	9.2694	5.8101	8.7426	13.2545	5.4901
		5.7294	9.124	5.3406	8.5951	12.6963	5.6908
		5.9869	9.5255	5.5793	8.6723	12.9115	5.4463
		6.2723	9.4269	5.7408	9.1293	13.5479	5.3366
		7.0696	9.8697	6.1801	9.159	13.0628	5.7471
		6.2487	9.6127	5.4616	8.5704	12.9487	5.7113
		5.9272	9.6966	5.2848	8.5717	13.1424	5.4239
		6.2349	9.6998	5.027	9.0346	13.0568	6.0903
		5.3655	8.6374	5.5812	9.1065	12.899	5.7874
		5.9768	9.5309	5.8463	8.3078	12.3326	6.3046
		5.6027	9.4902	5.9477	8.5556	13.0923	5.7071
		6.2721	9.65	5.2284	8.2111	12.0535	5.5887
		6.1608	9.466	5.3581	8.7255	12.4048	5.9428
		6.9776	9.6621	5.3781	8.6712	12.1568	6.1827
		6.9051	9.9159	5.4735	8.4222	11.4711	5.7023
		6.4511	9.6296	5.1098	8.6536	12.3954	5.9571
		6.7267	9.942	5.2797	8.7294	12.1145	5.6314
		6.5124	10.0748	5.7009	8.6155	12.3905	5.4803
		6.0508	9.9785	5.9897	8.7004	12.3485	6.2646
		6.1487	9.8005	5.4653	8.5317	11.9034	5.6326
		6.9964	9.864	5.6077	8.832	12.428	5.8686
		6.8336	9.9292	5.6945	8.8361	12.8003	6.1485
		7.3238	10.0109	5.888	8.6755	13.2906	5.7987
		6.2348	10.2646	5.71	7.9863	12.4807	5.4336
		6.4563	9.1469	5.385	8.7526	12.0479	5.8284
		6.9842	9.6943	5.4117	8.5894	12.9476	5.784
		6.3446	9.8635	5.9304	8.4264	12.7971	6.4725
		6.243	9.5023	6.2991	9.4505	12.9338	6.0661
		5.8065	9.5127	5.7449	8.1887	12.6396	6.1038
		6.5125	10.0524	6.3279	8.4378	11.9879	6.4814
		5.4873	8.8509	5.9034	9.2635	13.1811	6.3089
		5.6706	8.3838	5.3275	8.7467	11.8418	5.7379
		6.6982	9.7398	5.8232	8.3749	11.9194	6.1262
		7.3252	9.9577	5.8983	9.0003	12.9775	6.6074
		6.4939	9.5019	5.5766	9.0829	12.4698	6.033
		6.3628	9.553	5.57	8.3941	13.2466	5.9802
		6.2276	10.0483	5.5543	8.1814	12.503	5.7634
		6.5645	10.1852	6.1267	8.8648	13.6786	6.1343
		6.8067	9.8622	5.6432	8.9692	13.6389	5.7628
		6.5176	9.8502	6.0833	9.1409	13.3328	6.2682
		6.932	10.1329	5.8015	8.099	11.8559	6.4099
		7.0387	10.4414	6.3	8.9498	12.0176	5.7741
		7.3277	10.1222	5.8563	9.1072	12.0006	7.211
		6.2727	9.247	5.8288	9.2603	11.9244	7.481
		6.2717	9.6492	5.3745	9.3469	12.3458	6.9856
		6.6442	9.813	5.7553	9.7342	12.5124	7.1681
		6.856	10.0329	5.5984	9.2942	12.0291	7.1743
		7.9048	10.3531	6.0672	9.9314	13.2094	6.9618
		6.6914	9.7625	6.0551	9.6484	12.4474	7.7671
		7.226	9.8433	5.6978	9.2746	11.7385	7.4684
		6.8704	10.1902	5.9756	9.2419	10.8278	7.2572
		6.9168	10.7334	6.3778	8.9061	11.9047	7.4261
		7.4336	10.5345	5.7602	8.6724	11.9096	7.5635
		6.6421	10.2866	5.3563	8.3675	11.7662	8.4432
		6.9716	10.2474	5.4225	8.5043	11.8279	8.4631
		6.7529	10.3649	5.9889	8.572	11.9593	8.2485
		6.2578	10.1406	6.1412	8.8685	12.1324	8.3079
		6.4986	9.7531	5.9009	8.7662	12.0207	8.8994
		6.8211	10.4469	6.2435	8.5861	11.693	8.3531
		5.8192	9.923	5.581	8.2941	11.7584	7.579
		5.7463	9.3709	5.5442	8.5256	12.2821	9.4005
		6.2099	10.0701	5.8316	8.5363	12.0224	8.5081
		5.8368	9.7927	5.9552	9.2711	13.2331	8.7167
		6.0394	10.4255	5.3379	8.5097	12.5873	9.0687
		6.2085	10.2298	6.0641	8.5773	12.4179	9.1857
		6.3394	10.3108	6.0916	9.0042	12.986	9.4499
		6.8254	10.316	6.0123	9.1034	12.4806	10.2008
		6.1794	10.0699	5.7794	8.7559	11.96	9.4797
		5.7779	9.7185	6.0475	9.2388	11.828	9.4207
		6.1758	10.0984	5.6725	9.2221	10.9808	10.3725
		6.3685	10.5388	5.8642	8.7806	12.3286	8.731
		5.9523	10.0032	5.8582	8.7588	11.4741	9.6851
		6.1752	9.7633	5.5783	8.3388	11.114	8.4451
		6.6698	9.7137	5.0668	8.9021	11.3792	9.3201
		6.7616	9.8363	5.3306	8.2208	11.6655	7.4704
		6.2245	10.1436	5.6364	8.3949	12.0394	8.122
		6.4048	9.7759	5.7873	8.1349	11.3662	7.7575
		6.4253	9.5546	5.5742	8.9047	11.691	8.3037
		6.6465	9.7195	5.474	8.6487	12.3386	7.005
		6.5038	9.5235	5.686	9.1285	11.7787	7.3543
		6.3788	9.7008	5.4545	8.5086	11.851	7.1324
		6.4585	9.7488	5.023	9.2308	11.7105	7.4307
		6.4775	9.754	5.4275	9.4537	12.2545	7.8955
		6.4128	9.7673	6.1601	10.0108	12.6289	7.2523
		6.8325	9.3401	5.533	9.0695	11.916	6.9253
		6.4904	9.5968	5.3891	9.3623	12.4863	7.2495
		6.4592	9.62	5.6181	9.4951	12.9599	6.9985
		5.8545	9.5777	5.3831	9.1094	11.8763	7.3618
		5.2195	8.9011	4.9694	8.1415	11.5766	7.3158
		5.9257	9.5768	5.4253	8.2271	12.7369	6.2672
		6.3299	10.0265	5.6412	8.0997	12.4056	6.6327
		6.5543	10.031	5.8322	7.7865	12.1629	6.857
		6.7271	10.3705	6.7371	8.401	12.9705	6.2699
		6.3093	9.7953	5.605	8.6436	13.4631	6.4517
		6.5363	10.5804	6.281	8.7555	13.2247	6.6557
		6.3114	9.712	5.728	8.4181	12.9271	6.9233
		5.9973	9.6572	5.8455	8.5786	12.5972	6.9891
		5.3888	9.9354	5.9206	8.7985	12.4669	7.6931
		5.9078	9.9231	6.0142	8.6863	12.5376	6.8892
		5.4775	9.7408	5.4173	7.3147	11.814	7.0001
		6.5982	9.9434	5.2869	7.9073	11.9414	7.2366
		6.5699	10.1398	5.675	8.1298	11.9274	6.5051
		6.2435	10.1318	5.8328	8.4281	12.1429	6.6125
		6.0096	9.5353	5.5071	8.3184	11.8081	6.904
		6.9375	9.7047	5.373	8.0525	12.0994	7.5014
		6.9279	10.1599	5.6153	7.7183	11.6301	6.8838
		6.0583	9.4461	5.0255	8.2821	11.355	7.5183
		6.9168	9.7766	5.1396	8.359	11.5991	6.5915
		7.7183	10.135	5.1433	7.8737	11.5217	6.717
		7.224	9.9389	5.3294	7.7473	11.3956	7.0304
		6.7675	9.9865	5.4017	7.8092	11.6281	6.9119
		7.9567	11.1721	6.1583	8.3406	12.7827	6.6189
		7.3083	10.969	6.4561	8.4339	12.5104	7.6881
		8.2782	11.6465	6.7502	8.6217	12.5808	6.8991
		8.0988	11.1661	5.8988	7.8234	11.8191	6.2568
		7.9648	10.7954	5.9974	7.9658	12.6751	7.036
		7.6994	10.7564	5.87	8.3085	13.0854	6.8065
		7.8615	10.9415	6.0722	7.6308	12.5227	6.4966
		7.9371	11.4228	6.4248	8.1551	11.5507	7.2262
		7.5062	11.0606	6.0763	7.6899	11.6926	7.3439
		7.0885	11.1066	5.8293	7.1189	11.168	7.8405
		8.079	11.3593	6.0684	8.6288	12.4451	7.1839
		7.5198	10.5228	5.9334	8.6705	12.4122	7.0117
		7.276	10.1892	5.4754	7.926	12.385	7.062
		7.6165	10.5334	5.9969	8.013	12.0692	7.3568
		7.8737	10.6021	5.9902	9.0034	12.8532	7.0618
		7.8229	10.5475	5.7097	7.7057	11.6131	7.0217
		7.46	10.0178	5.3987	7.7436	11.83	6.84
		7.9063	11.0596	6.2325	8.1469	12.1868	7.124
		7.0548	10.026	5.4013	7.6698	11.5769	7.29
		7.7498	10.8246	6.0716	8.2084	11.8746	7.1242
		6.4792	9.7903	5.4117	7.9595	11.6465	7.1964
		6.7196	10.1455	5.3676	8.0407	12.3548	6.9271
		7.3848	10.2142	5.4568	8.2347	11.9339	7.2018
		7.2534	10.5018	5.8173	7.9884	12.6467	7.2159
		6.8883	9.8083	5.3021	7.9568	11.8428	7.022
		7.3303	10.3239	5.6826	7.9757	11.9615	6.6715
		6.246	9.8032	5.7097	7.8819	12.0836	6.6653
		6.4766	9.7083	5.2237	8.1203	12.0404	7.0574
		7.2009	10.3179	5.4024	7.633	12.0974	7.0379
		7.5534	9.7125	5.5156	9.006	13.2476	8.1263
		6.7899	9.3614	4.8821	7.6956	11.1192	7.1168
		6.7932	9.4197	5.3236	8.2046	12.3726	6.7537
		5.8065	9.0889	4.9065	7.9756	12.0237	6.8257
		6.366	9.4812	5.3465	7.9646	12.1263	6.7462
		6.4263	9.7646	5.1509	8.4898	12.7279	6.7448
		5.7476	9.5102	5.5928	7.7712	11.8855	6.9284
		6.1196	10.0883	5.7938	8.8063	13.3112	6.714
		6.0001	9.5247	5.2928	7.971	12.073	6.608
		6.7717	10.0909	5.1455	8.1466	11.9014	6.5966
		6.3907	9.7779	5.6888	7.7451	12.455	7.0319
		6.0432	9.7989	5.6197	8.2112	12.2746	6.6995
		6.1631	9.8503	5.6081	8.1938	12.6084	6.9963
		6.7565	10.3137	5.9437	8.3252	12.0424	6.6539
		7.2044	10.2785	5.7442	8.8604	12.4424	8.0087
		7.2143	9.8874	5.6678	8.3103	11.6562	7.8921
		8.0368	10.2494	6.0493	8.4378	12.1913	8.2471
		7.9395	10.4031	5.5379	8.2169	11.1033	8.0117
		7.5326	10.2742	5.4504	8.1803	11.4822	7.5462
		7.3777	9.9243	5.452	8.5102	12.1663	7.4622
		7.5819	10.2104	5.8873	8.3851	12.3447	6.4056
		7.2366	10.2617	5.6687	8.0127	12.1603	7.213
		7.0431	9.7545	5.3969	8.0535	12.1834	6.7683
		7.388	10.5907	5.796	7.7849	11.7365	7.3825
		7.9003	10.2998	5.5311	8.5098	11.7377	7.7781
		6.7528	9.9819	5.4033	8.4329	12.2125	6.6555
		6.0889	9.7307	5.3359	8.0745	11.9421	7.4766
		6.1234	9.6426	5.3845	7.877	11.8845	7.0343
		6.6393	9.7437	5.6428	8.0469	12.3351	6.9259
		6.2739	10.2303	5.7066	8.094	11.7751	6.9152
		5.4079	9.7495	5.7745	8.3743	12.5413	6.9734
		6.3811	9.7193	5.4316	7.9807	12.1912	6.7838
		6.0833	9.6383	5.5496	8.4259	12.2615	7.4408
		6.954	10.3985	5.6647	8.3033	11.952	7.0065
		6.5776	10.191	6.1232	8.806	13.0124	6.2538
		5.7475	9.5959	6.1792	8.6155	12.5807	5.8618
		5.3641	9.6886	5.87	8.279	12.4159	5.3722
		5.5979	9.6447	5.8289	8.2932	12.4536	5.6484
		6.1684	9.7284	5.5619	8.8291	12.2747	5.6794
		5.8489	9.753	5.778	8.9856	12.4955	5.7027
		6.0182	9.88	5.4301	8.5201	12.5689	5.5572
		6.0118	10.1017	6.0086	8.4859	12.3236	5.8898
		6.1974	9.8799	6.0585	8.839	12.6231	5.7818
		6.5285	9.9286	5.6301	8.7031	12.5825	5.8807
		6.2375	10.0568	5.7058	8.4657	11.7663	5.76
		6.0648	9.875	5.5163	8.8293	12.9744	5.7702
		6.4105	9.5945	5.7288	8.797	13.2277	5.8294
		6.3939	9.505	5.9992	9.0778	13.5605	5.8611
		6.2865	9.2308	5.2071	8.7263	12.9722	5.6301
		6.3937	9.7836	5.6386	8.7569	12.5376	5.7322
		6.5223	9.8905	5.5684	8.6414	12.7011	5.5709
		6.4886	9.3837	5.4157	9.1242	12.2588	5.7334
		6.2988	9.3977	5.6867	9.0153	13.4356	5.6779
		6.2333	9.5588	5.1204	9.0092	13.0276	5.8838
		6.35	9.852	5.807	9.1279	13.1802	5.8535
		6.0525	9.7438	4.8181	8.7206	12.0603	5.755
		6.2323	9.3398	5.1866	8.591	11.8854	5.9436
		6.5458	9.746	5.3871	8.9111	12.1485	6.031
		6.4418	9.9945	5.5996	8.48	12.2526	5.2575
		7.0343	10.4238	5.4393	8.5059	12.0449	5.7397
		6.5511	9.9551	5.2781	8.3811	11.8546	6.0133
		6.2291	9.3678	5.3901	8.9058	12.166	5.7921
		5.9738	9.3205	5.4114	8.8652	12.1202	6.085
		5.9908	9.2144	5.2781	8.4349	12.3997	5.5874
		5.1515	9.5999	5.4949	8.0267	11.8651	5.4271
		5.1572	9.7301	6.2036	8.9968	12.5736	5.8535
		5.0973	9.6246	5.9034	9.0879	12.8236	6.3661
		5.7949	9.9851	5.5217	8.114	12.0788	5.6129
		5.2837	9.3106	5.5301	9.1203	12.6566	6.5724
		5.4996	9.3546	5.637	8.3909	12.6999	6.1839
		5.5411	9.8491	5.9967	8.4592	12.3336	5.603
		5.4795	9.2371	5.4778	8.8132	12.8879	5.679
		5.8989	9.4045	5.766	8.842	12.8632	5.7128
		6.2909	9.8837	5.5252	8.949	12.7676	5.5832
		5.9967	9.5869	5.3906	8.7898	12.7422	5.7983
		5.4099	9.6759	5.7064	8.8478	12.2315	5.8207
		5.0176	9.6893	5.5242	8.4852	12.2064	5.9171
		5.5018	9.4809	5.5513	8.5744	12.4901	5.9791
		5.3993	9.6011	5.7844	8.96	12.4444	5.8639
		5.2191	9.1584	5.1435	8.9127	12.2859	5.9743
		5.391	9.7775	5.95	8.3226	11.9107	5.4949
		5.2385	9.6706	5.8586	8.9316	12.5602	6.306
		5.9769	10.0024	5.255	8.7624	12.5023	5.7916
		6.0594	9.6427	5.5464	9.2102	12.9395	5.8947
		5.6075	9.7803	5.5429	8.9393	12.8569	5.8074
		5.7475	9.6964	5.7865	8.7853	12.0438	5.5353
		6.1321	9.4742	5.4279	9.0675	12.5239	5.9915
		5.6929	9.3296	5.6922	8.9558	13.2486	5.7651
		5.9647	9.4685	5.6887	9.0663	13.4539	6.0934
		5.78	9.6119	5.8272	8.4874	11.7643	5.734
		5.6307	9.4983	5.8809	8.7913	12.9099	5.484
		5.0241	9.1649	5.7576	8.854	12.5889	5.5828
		4.6728	9.0962	5.3546	8.7389	12.2656	5.948
		5.1371	9.8481	6.1083	8.4909	12.2365	5.716
		5.2658	9.4073	5.6657	8.806	12.4641	5.7445
		5.0191	9.5447	5.6566	8.961	12.9817	5.7133
		3.8511	9.0253	5.422	8.702	12.4294	6.1793
		4.8824	9.4393	5.7134	8.5619	13.287	5.3632
		5.0011	9.4901	5.5573	8.886	13.2571	6.1258
		4.6149	9.1982	5.8445	9.1539	12.8171	6.1999
		4.8109	9.3647	5.3995	8.9513	12.4769	5.7052
		4.9528	9.3832	5.5641	8.9486	12.4037	5.8694
		4.5179	9.267	5.7634	9.0625	12.5981	5.9621
		4.1137	9.0757	5.6529	9.0926	12.6096	5.6597
		4.945	9.2151	5.6315	9.002	12.8821	6.2209
		4.837	9.3315	5.644	9.1335	12.5992	6.1899
		5.4879	9.1962	5.5882	9.4057	13.6719	5.7319
		6.0506	9.5219	5.5751	8.7151	12.1043	5.7428
		6.2531	9.6202	5.7131	8.3264	12.7076	5.3113
		6.6242	10.3343	6.1206	8.8322	12.2148	6.4068
		5.8995	9.5811	5.7359	8.9256	12.3724	5.8331
		5.3065	9.1746	5.282	8.7204	12.2403	6.2638
		5.5261	9.3374	5.3015	8.8342	12.4395	6.2576
		5.789	9.2073	5.4677	9.311	13.2527	6.2849
		5.1916	9.1151	5.6761	9.2372	12.4294	5.7703
		6.187	9.3856	5.4329	9.3211	13.5231	5.8004
		5.4379	9.4538	5.3377	8.4961	13.1369	5.6596
		5.7532	9.6064	5.4242	8.8725	12.5796	6.3059
		5.5031	9.5051	5.3926	8.4453	12.3329	5.8143
		5.2592	8.9525	5.2456	8.2715	12.3415	5.621
		5.6013	9.6499	5.9945	9.3228	13.4459	6.3357
		5.1009	9.3615	5.4236	8.8998	12.8203	5.6628
		5.477	9.9542	5.7888	8.8826	12.7457	5.6417
		4.948	9.2809	5.38	9.2265	12.6715	6.3028
		5.3149	9.3135	5.5406	8.987	12.4992	6.0141
		4.9439	9.145	5.6185	9.65	13.0779	6.0731
		5.1157	9.0985	5.5364	9.1576	13.1654	6.2492
		4.766	8.695	5.4014	8.8323	11.993	6.0747
		4.6389	8.899	5.5443	8.7248	11.6887	6.1977
		5.136	9.497	5.7158	8.697	11.9893	5.8641
		5.3743	9.7174	5.7043	8.633	12.1868	5.9257
		5.4776	9.3445	5.6611	9.2636	12.9612	6.151
		5.3416	9.5391	5.4126	9.0004	12.4296	6.0878
		5.0086	9.4726	5.4015	8.8713	12.9675	5.6323
		6.1198	9.3507	5.3876	8.8592	12.5219	5.6615
		5.7966	9.6175	5.849	9.4332	13.0685	5.8437
		5.2271	9.3398	5.3445	9.5665	13.1227	6.5001
		4.6233	9.4632	5.4939	8.8611	13.1554	6.1451
		4.8594	9.2478	5.6708	8.8041	12.4763	5.8981
		4.7319	9.312	5.1676	8.7039	12.1092	5.635
		4.8603	9.4532	5.2546	8.3593	11.3613	6.1522
		4.7429	9.7501	5.6192	8.8419	12.655	5.6453
		5.4569	9.725	5.7219	8.7906	12.7043	5.4953
		4.5919	9.1498	5.2479	8.7321	12.2465	5.8788
		4.4843	9.3897	5.3736	8.5891	11.9213	5.7671
		4.5916	9.2663	5.5061	8.7771	12.7412	5.6618
		5.2174	10.0884	5.7408	8.9864	12.7757	5.7224
		4.7716	9.0725	5.2487	8.4129	12.1173	5.7377
		5.1929	9.7558	5.5478	8.4102	12.3959	5.5925
		4.6824	9.354	5.6508	8.3473	12.0667	5.6866
		4.8362	9.5391	5.8136	8.5155	12.2157	5.5092
		5.2559	9.4192	5.499	8.5172	12.4983	6.1377
		5.3427	9.3337	5.4766	8.483	12.6258	5.6319
		5.3938	9.7822	5.4892	8.3033	11.6448	5.6039
		5.3528	9.0487	5.2985	9.1048	13.058	5.8255
		4.9458	9.2911	5.6714	8.7578	12.6617	6.6585
		5.2715	9.5199	5.7353	8.8856	12.7481	5.9236
		5.1983	10.0154	5.7966	8.9602	13.0226	6.0201
		5.8476	9.4076	5.8542	8.7819	12.9853	6.1162
		5.3273	9.277	5.5627	9.1759	12.9994	6.2017
		5.5936	9.5759	5.5555	8.66	12.5041	5.7162
		5.1257	9.7824	5.7926	9.2127	13.0796	5.8597
		4.5949	9.3323	5.6345	9.2491	13.1274	6.1641
		5.0949	10.0999	5.9105	8.7436	12.5197	6.0272
		4.8054	9.1666	5.3293	8.5693	12.8238	5.8592
		4.9022	9.4634	5.5559	8.8277	12.9848	5.7019
		4.6771	9.7446	6.0771	9.0815	12.945	6.1669
		4.8647	9.2785	5.8613	8.8687	12.5919	6.8648
		5.1423	9.5573	5.7067	8.7403	12.6213	5.9264
		5.1382	9.5236	5.8478	8.6597	13.2482	5.8203
		5.4565	9.5839	5.7627	8.9725	13.2143	5.5517
		5.2855	9.774	5.9964	8.6554	12.6514	5.1613
		5.135	9.9465	5.4411	8.4606	11.484	5.7185
		4.9137	9.3548	5.4383	8.2312	11.7759	5.6031
		5.0847	9.4768	5.5144	8.5837	12.102	5.5247
		4.7706	8.8352	4.8919	8.5307	11.6251	5.8653
		5.1859	9.8583	5.2167	8.8238	11.5805	5.9015
		5.3821	9.6226	5.5849	8.5404	11.2878	5.6273
		5.5305	9.4955	5.6323	9.0324	11.7991	6.2306
		5.0677	9.6761	5.3159	8.7763	11.5634	6.2836
		5.1946	9.4584	5.5497	8.7789	12.5907	5.6753
		5.6018	9.7394	5.5336	9.0067	12.5677	5.6876
		4.8035	10.0214	5.5354	8.7353	10.8189	6.2214
		4.7995	9.3619	5.2883	8.6693	11.3852	5.9286
		5.3087	9.51	5.6344	8.8492	11.6267	6.0537
		5.168	9.7281	5.4761	8.2317	11.6668	5.7195
		5.0943	9.5562	5.8668	8.9327	12.654	5.7731
		4.6564	9.3998	5.5347	9.1852	11.736	6.894
		4.7543	9.3995	5.5511	8.5827	12.0034	6.4318
		4.9709	9.3211	5.3615	8.522	12.5405	5.6211
		4.4469	9.1822	5.6426	8.8102	12.8306	5.7211
		4.7196	9.2911	5.811	8.7894	12.2385	6.0826
		5.0793	9.3727	5.1662	8.8893	12.7623	6.0649
		4.6254	8.7225	5.3496	9.097	13.3003	6.114
		4.4808	9.2728	5.3173	8.517	12.0744	5.9546
		4.9129	9.5775	5.6567	8.8506	12.6862	5.8276
		4.5607	9.4038	5.3372	8.5982	12.8241	5.7989
		4.7204	9.1902	5.4368	8.474	12.4616	5.9176
		5.6743	9.475	5.4347	8.9711	12.3268	5.8429
		5.7002	9.4436	5.6906	8.8978	12.049	5.7689
		6.0356	9.4334	5.5392	8.917	11.5165	6.2755
		5.7088	9.4343	5.5704	8.6526	11.8267	5.5787
		5.3141	9.7861	5.8294	8.5544	12.1397	5.7931
		5.2104	9.1864	5.7759	8.9196	12.676	5.8172
		4.6745	9.4829	5.8427	8.6642	12.9919	5.6865
		4.7925	9.2723	5.6597	8.5881	12.2544	6.2696
		5.0147	9.2404	5.6175	9.0051	13.3577	5.9917
		5.1705	8.9877	5.5713	9.4726	12.9644	6.0244
		4.9779	9.1679	5.158	8.8509	12.5791	6.0809
		5.2159	9.5946	5.6613	8.8654	12.538	5.6181
		5.1308	9.203	5.7994	9.3868	13.4527	6.1833
		5.3899	9.2647	5.6134	9.2663	12.8173	6.5142
		5.3364	9.556	5.7906	9.4145	13.204	6.4617
		5.1893	9.0516	5.1107	8.7884	13.0101	5.9394
		5.6639	9.5523	5.8182	8.7091	12.1003	5.894
		5.6524	9.5123	5.529	8.5055	11.9574	5.3793
		5.3205	9.4024	5.8272	9.1376	12.732	5.9288
		4.7609	9.2165	5.5239	8.4028	12.3549	5.7579
		5.9444	9.712	5.6036	9.2164	12.1989	6.5359
		5.2909	9.4155	5.4549	9.2825	12.6386	6.0894
		4.9418	9.2973	5.2995	8.6874	12.9917	5.8207
		4.8512	9.6754	5.6437	8.8921	12.5433	5.9125
[truncated: 28,002 more rows]

## Sheet: H-contact
	#Acceptor	DonorH	Donor	Frames	Frac	AvgDist	AvgAng
	4YB_111@O2N	LIG_116@H11	LIG_116@N19	1892	0.0631	2.9333	152.699
	LIG_116@O29	LIG_116@H11	LIG_116@N19	1059	0.0353	2.7406	139.298
	0MA_114@O6	LIG_116@H23	LIG_116@N22	782	0.0261	2.9663	155.549
	0MA_114@O4	LIG_116@H11	LIG_116@N19	748	0.0249	2.943	152.901
	0MA_114@O6	LIG_116@H11	LIG_116@N19	623	0.0208	2.9793	153.379
	4YB_111@O3	LIG_116@H11	LIG_116@N19	429	0.0143	2.9451	154.388
	PHE_93@O	LIG_116@H23	LIG_116@N22	327	0.0109	3.0188	158.623
	LIG_116@O29	4YB_111@H3O	4YB_111@O3	3528	0.1176	2.7988	156.496
	LIG_116@O29	VMB_112@H2O	VMB_112@O2	3123	0.1041	2.8507	151.935
	LIG_116@O29	4YB_111@H2N	4YB_111@N2	1854	0.0618	2.9943	160.208
	LIG_116@O29	LIG_116@H11	LIG_116@N19	1059	0.0353	2.7406	139.298
	LIG_116@O29	0MA_114@H2O	0MA_114@O2	978	0.0326	2.7648	156.18
	LIG_116@N38	4YB_111@H2N	4YB_111@N2	619	0.0206	3.1056	160.635
	LIG_116@N2	0MA_113@H6O	0MA_113@O6	492	0.0164	2.9234	159.534
	LIG_116@O21	4YB_111@H2N	4YB_111@N2	393	0.0131	3.1342	158.297
